# Supplementary material for: Genetic Differences in Dorsal Hippocampus Acetylcholinesterase Activity Predict Contextual Fear Learning Across Inbred Mouse Strains
Source: Front Psychiatry. 2021 Oct 18;12:737897. doi: 10.3389/fpsyt.2021.737897 (PMC8558262; doi:10.3389/fpsyt.2021.737897)
Supplement: Supplementary file 14 [file Table_1.XLSX]

## Sheet: Summary
Ach-related Gene Polymorphism Summary
Gene	Protein	Polymorphisms in surveyed strains (SNPs and indels)	Gene length (bps)		Heading Abbreviation	Meaning
Ache	Acetylcholinesterase	18	6220		chr	Chromosomal coordinates
Chat	Choline acetyltransferase; VAChT	111	57707		bp38	Chromosomal coordinates
Ric3	RIC3 acetylcholine receptor chaperone	1	49020		rs	dbSNP rs number
Bche	Butyrylcholinesterase	236	72608		observed	Polymorphism type
Chrna7	Cholinergic receptor, nicotinic, alpha polypeptide 7	1212	113835		dbsnp142annot	dbSNP functional annotation
Chrna3	Cholinergic receptor, nicotinic, alpha polypeptide 3	71	16446		requested	Gene entry
Chrna4	Cholinergic receptor, nicotinic, alpha polypeptide 4	117	21269
Chrnb2	Cholinergic receptor, nicotinic, beta polypeptide 2 (neuronal)	1	11185		Strains in SNP survey: DBA/1J, C57BL/6J, LP/J, BALB/cJ, DBA/2J, 129S1/SvImJ, CBA/J, C3H/HeJ, A/J, AKR/J, NZB/BINJ, FVB/NJ, BTBR T+ Itpr3tf/J
Chrna1	Cholinergic receptor, nicotinic, alpha polypeptide 1 (muscle)	206	17058
Chrna5	Cholinergic receptor, nicotinic, alpha polypeptide 5	124	26900
Chrnb1	Cholinergic receptor, nicotinic, beta polypeptide 1 (muscle)	91	11908
Chrnb3	Cholinergic receptor, nicotinic, beta polypeptide 3	143	31020		Polymorphisms surveyed using Mouse Phenome Database SNP data retrieval tool and Sanger4 data set. Protein and gene length info from MGI (Mouse Genome Informatics) database.
Chrnb4	Cholinergic receptor, nicotinic, beta polypeptide 4	216	20626
Chrna2	Cholinergic receptor, nicotinic, alpha polypeptide 2 (neuronal)	13	17910
Chrnd	Cholinergic receptor, nicotinic, delta polypeptide	47	9464
Chrna6	Cholinergic receptor, nicotinic, alpha polypeptide 6	49	10733
Chrna9	Cholinergic receptor, nicotinic, alpha polypeptide 9	47	42406
Chrne	Cholinergic receptor, nicotinic, epsilon polypeptide	16	4331
Chrng	Cholinergic receptor, nicotinic, gamma polypeptide	26	6025
Chrm3	Cholinergic receptor, muscarinic 3, cardiac	0	485362
Chrm1	Cholinergic receptor, muscarinic 1, CNS	34	19602
Chrm2	Cholinergic receptor, muscarinic 2, cardiac	141	140331
Chrm4	Cholinergic receptor, muscarinic 4	1	1440
Chrm5	Cholinergic receptor, muscarinic 5	14	1599
Chrna10	Cholinergic receptor, nicotinic, alpha polypeptide 10	9	5563

## Sheet: Ache
chr	bp38	rs	observed	dbsnp142annot	requested	DBA/1J	C57BL/6J	LP/J	BALB/cJ	DBA/2J	129S1/SvImJ	CBA/J	C3H/HeJ	A/J	AKR/J	FVB/NJ	BTBR T<+> Itpr3<tf>/J	NZB/BlNJ
5	137288803		indel		Ache		0	3	0
5	137289310	rs3150276	C/T	I:Ache U5:Ache NC:Ache	Ache	C	T	C	C	C	C	C	C	C	T	C	C	C
5	137289331	rs251133460	A/G	I:Ache U5:Ache NC:Ache	Ache	G	G	G	G	G	G	G	G	G	A	G	G	G
5	137289451	rs3150279	A/T	I:Ache U5:Ache NC:Ache	Ache	T	A	T	T	T	T	T	T	T	A	T	T	T
5	137291117	rs265054748	indel	I:Ache	Ache	1	0	1	1	1	1	1	1	1		1	1	1
5	137291301	rs262201350	indel	I:Ache	Ache	1	0	1	1	1	1	1	1	1		1	1	1
5	137291625	rs3144896	A/G	Cs:Ache:A:405 I:Ache	Ache	G	A	G	G	G	G	G	G	G	A	G	G	G
5	137291659	rs3150087	C/T	Cs:Ache:L:417 I:Ache	Ache	T	C	T	T	T	T	T	T	T	C	T	T	T
5	137292186	rs3150088	C/T	I:Ache	Ache	C	T	C	C	C	C	C	C	C	T	C	C	C
5	137292734	rs3150092	C/T	I:Ache	Ache	C	T	C	C	C	C	C	C	C	T	C	C	C
5	137292976				Ache		A	T		A	T			T			T	A
5	137292978	rs578958284	A/C/T	I:Ache	Ache		A			A	C	C	C	C		C	C	A
5	137292980	rs582976249	A/T	I:Ache	Ache		A	T		A	T		T	T	T	T	T
5	137292982	rs586484810	A/T	I:Ache	Ache		A	T	T	A	T	T	T	T	A	T	T
5	137292984	rs579167600	A/T	I:Ache	Ache	A	A	T	T	A	T	T	T	T	A	T	T
5	137293002	rs52101014	A/T	I:Ache	Ache	T	A	T	T	T	T	T	T	T	A	T	T	T
5	137293739	rs242440269	indel	I:Ache U3:Ache	Ache		0								1
5	137293742	rs245220993	indel	I:Ache U3:Ache	Ache	1	0	1	1	1	1	1	1	1		1	1	1

## Sheet: Chat
chr	bp38	rs	observed	dbsnp142annot	requested	DBA/1J	C57BL/6J	LP/J	BALB/cJ	DBA/2J	129S1/SvImJ	CBA/J	C3H/HeJ	A/J	AKR/J	FVB/NJ	BTBR T<+> Itpr3<tf>/J	NZB/BlNJ
14	32408203	rs581722943	C/T	U3:Chat	Chat	C	C	C	C	C	C	C	C	C	C	C	C	T
14	32408207	rs583840583	C/T	U3:Chat	Chat	C	C		C	C		C	C	C	C			T
14	32411127	rs255929055	indel	I:Chat	Chat		0	1			1							1
14	32411379	rs229603187	indel	I:Chat	Chat		0	1			1							1
14	32412562	rs252814711	indel	I:Chat	Chat		0					3	3
14	32412605	rs258191898	indel	I:Chat	Chat		0											3
14	32412605	rs581823503	A/T	I:Chat	Chat	T	T	A	T	T	T	T	T	T	T	T	T	T
14	32421991	rs211901218	indel	I:Chat	Chat		0	1			1
14	32422255	rs31542088	A/G	I:Chat	Chat	A	A	G	A	A	G	A	A	A	A	A	A	G
14	32424292	rs31012185	A/G	I:Chat	Chat	A	A	G	A	A	G	A	A	A	A	A	A	G
14	32425598	rs30148759	A/G	I:Chat	Chat	G	G	A	G	G	A	G	G	G	G	G	G	A
14	32427276	rs47003921	G/T	I:Chat	Chat	G	G	T	G	G	T	G	G	G	G	G	G	T
14	32427374	rs6172631	C/T	I:Chat	Chat	T	T	C	T	T	C	T	T	T	T	T	T	C
14	32428787	rs217388479	indel	I:Chat	Chat		0	1			1							1
14	32428922	rs47247476	A/T	I:Chat	Chat	T	T	A	T	T	A	T	T	T	T	T	T	A
14	32429495	rs213820795	indel	I:Chat	Chat		0	1			1							1
14	32432150	rs30490869	A/G	I:Chat	Chat	A	A	G	A	A	G	A	A	A	A	A	A	G
14	32432199	rs30190653	C/T	I:Chat	Chat	T	T	C	T	T	C	T	T	T	T	T	T	C
14	32432461	rs221236859	indel	I:Chat	Chat		0	1			1							1
14	32432800	rs30734207	C/T	I:Chat	Chat	C	C	T	C	C	T	C	C	C	C	C	C	T
14	32433445	rs223044130	indel	I:Chat	Chat		0	1			1							1
14	32433636	rs244924198	indel	I:Chat	Chat		0	1
14	32433723	rs52629045	A/G	I:Chat	Chat	A	A	G	A	A	G	A	A	A	A	A	A	G
14	32434297	rs244255640	indel	I:Chat	Chat		0	1			1							1
14	32434640	rs247869909	indel	I:Chat	Chat		0	1			1							1
14	32435010	rs228410932	A/G/T	I:Chat	Chat	A	A	G	A	A	G	A	A	A	A	A	A	G
14	32435639		indel		Chat		0									1
14	32436130	rs3658485	C/T	I:Chat	Chat	C	C	T	C	C	T	C	C	C	C	C	C	T
14	32436285	rs6222246	A/C	I:Chat	Chat	C	C	A	C	C	A	C	C	C	C	C	C	A
14	32436598	rs248903609	indel	I:Chat	Chat		0	1			1							1
14	32438015	rs228411432	C/T	I:Chat	Chat	C	C	T	C	C	T	C	C	C	C	C	C	T
14	32438817	rs241271545	A/G	I:Chat	Chat	A	A	G	A	A	G	A	A	A	A	A	A	G
14	32439222	rs31091388	A/G	I:Chat	Chat	G	G	A	G	G	A	G	G	G	G	G	G	A
14	32439424	rs30590606	A/G	I:Chat	Chat	A	A	G	A	A	G	A	A	A	A	A	A	G
14	32439501	rs31159052	A/G	I:Chat	Chat	A	A	G	A	A	G	A	A	A	A	A	A	G
14	32440036	rs248802455	G/T	I:Chat	Chat	T	T	G	T	T	G	T	T	T	T	T	T	G
14	32441811	rs30163311	G/T	I:Chat	Chat	T	T	G	T	T	G	T	T	T	T	T	T	G
14	32442283	rs252785119	indel	I:Chat	Chat		0	1										1
14	32442728	rs51138733	C/T	I:Chat	Chat	T	T	C	T	T	C	T	T	T	T	T	T	C
14	32442849	rs52017666	C/T	I:Chat	Chat	C	C	T	C	C	T	C	C	C	C	C	C	T
14	32443608	rs48040544	C/T	I:Chat	Chat	C	C	T	C	C	T	C	C	C	C	C	C	T
14	32443709	rs30832246	A/G	I:Chat	Chat	G	G	A	G	G	A	G	G	G	G	G	G	A
14	32444329	rs30203833	A/G	I:Chat	Chat	G	G	A	G	G	A	G	G	G	G	G	G	A
14	32445004	rs30159772	C/T	I:Chat	Chat	T	T	C	T	T	C	T	T	T	T	T	T	C
14	32445474	rs31013978	A/G	I:Chat	Chat	G	G	A	G	G	A	G	G	G	G	G	G	A
14	32445593	rs30258647	G/T	I:Chat	Chat	T	T	G	T	T	G	T	T	T	T	T	T	G
14	32445739	rs253302759	indel	I:Chat	Chat		0					1
14	32447398	rs263560610	indel	I:Chat	Chat		0	1			1						0	1
14	32447528	rs30882177	A/G	I:Chat	Chat	A	A	G	A	A	G	A	A	A	A	A	A	G
14	32447566	rs261594491	indel	I:Chat	Chat		0	1			1
14	32447629	rs30732533	A/C	I:Chat	Chat	C	C	A	C	C	A	C	C	C	C	C	C	A
14	32447642	rs261151715	indel	I:Chat	Chat		0	1			1							1
14	32447888	rs46654310	A/T	I:Chat	Chat	A	A	T	A	A	T	A	A	A	A	A	A	T
14	32448044	rs30566489	C/T	I:Chat	Chat	T	T	C	T	T	C	T	T	T	T	T	T	C
14	32448139	rs31509293	C/T	I:Chat	Chat	C	C	T	C	C	T	C	C	C	C	C	C	T
14	32448228	rs30920468	A/G	I:Chat	Chat	A	A	G	A	A	G	A	A	A	A	A	A	G
14	32448433	rs214326302	A/G	I:Chat	Chat	A	A	G	A	A	G	A	A	A	A	A	A	G
14	32448541	rs45999067	G/T	I:Chat	Chat	T	T	G	T	T	G	T	T	T	T	T	T	G
14	32449654	rs247163819	indel	I:Chat	Chat		0	1			1							1
14	32449858	rs240223821	indel	I:Chat	Chat		0	1			1							1
14	32450227	rs215009936	indel	I:Chat	Chat		0	1			1							1
14	32450322	rs222615321	indel	I:Chat	Chat		0	1			1
14	32450600	rs218952949	indel	I:Chat	Chat		0	1			1							1
14	32450651	rs261387811	indel	I:Chat	Chat		0	1			1							1
14	32450694	rs262311502	indel	I:Chat	Chat		0	1							0			1
14	32450748	rs30454736	C/T	I:Chat	Chat	C	C	T	C	C	T	C	C	C	C	C	C	T
14	32450773	rs240556864	G/T	I:Chat	Chat	T	T	G	T	T	G	T	T	T	T	T	T	G
14	32451185	rs30795329	A/G	I:Chat	Chat	G	G	A	G	G	A	G	G	G	G	G	G	A
14	32451605	rs31375839	A/G	I:Chat	Chat	G	G	A	G	G	A	G	G	G	G	G	G	A
14	32451810				Chat	C	C	C	C	C	C	C	C	C	C	C	T	C
14	32451913	rs30352336	A/G	I:Chat	Chat	A	A	G	A	A	G	A	A	A	A	A	A	G
14	32452372	rs30245287	A/G	I:Chat	Chat	A	A	G	A	A	G	A	A	A	A	A	A	G
14	32452672	rs264767456	indel	I:Chat	Chat		0	1			1							1
14	32452824	rs30653432	C/T	I:Chat	Chat	T	T	C	T	T	C	T	T	T	T	T	T	C
14	32452941	rs31092066	A/T	I:Chat	Chat	A	A	T	A	A	T	A	A	A	A	A	A	T
14	32452968	rs30309305	A/T	I:Chat	Chat	A	A	T	A	A	T	A	A	A	A	A	A	T
14	32453163	rs31056477	C/T	I:Chat	Chat	C	C	T	C	C	T	C	C	C	C	C	C	T
14	32453646	rs48234330	C/T	I:Chat	Chat	C	C	T	C	C	T	C	C	C	C	C	C	T
14	32454023	rs232155046	indel	I:Chat	Chat		0	1			1							1
14	32454179	rs214975149	indel	I:Chat	Chat		0	1			1							1
14	32454186	rs587033621	A/C/G	I:Chat	Chat	C	C		C	C		C	C	C	C	C	C	A
14	32454199	rs30240945	A/G	I:Chat	Chat	G	G	A	G	G	A	G	G	G	G	G	G	A
14	32455319	rs31195392	A/G	I:Chat	Chat	A	A	G	A	A	G	A	A	A	A	A	A	G
14	32455902	rs52616164	G/T	I:Chat	Chat	T	T	G	T	T	G	T	T	T	T	T	T	G
14	32455933	rs52655187	C/T	I:Chat	Chat	T	T	C	T	T	C	T	T	T	T	T	T	C
14	32456106	rs258553611	indel	I:Chat	Chat		0	1			1							1
14	32456138	rs51522281	C/T	I:Chat	Chat	C	C	T	C	C	T	C	C	C	C	C	C	T
14	32456222	rs50954412	C/T	I:Chat	Chat	T	T	C	T	T	C	T	T	T	T	T	T	C
14	32456231	rs47602981	C/T	I:Chat	Chat	C	C	T	C	C	T	C	C	C	C	C	C	T
14	32456256	rs49303157	A/G	I:Chat	Chat	G	G	A	G	G	A	G	G	G	G	G	G	A
14	32456325	rs51986100	A/G	I:Chat	Chat	A	A	G	A	A	G	A	A	A	A	A	A	G
14	32456622	rs46274031	A/G	I:Chat	Chat	G	G	A	G	G	A	G	G	G	G	G	G	A
14	32458144	rs255871478	indel	I:Chat	Chat		0	1			1							3
14	32458777	rs30539038	C/T	I:Chat	Chat	C	C	T	C	C	T	C	C	C	C	C	C	T
14	32459089				Chat	C	C	C	C	C	C	C	C	C	C	C	C	T
14	32459627		indel		Chat		0	1
14	32459700		indel		Chat		0											1
14	32459700	rs3654135	A/G	I:Chat	Chat	G	G	A	G	G	A	G	G	G	G	G	G	G
14	32459829	rs3668823	C/T	I:Chat	Chat	C	C	T	C	C	T	C	C	C	C	C	C	T
14	32460006	rs31092373	A/G	I:Chat	Chat	A	A	G	A	A	G	A	A	A	A	A	A	G
14	32460132	rs51084058	A/G	I:Chat	Chat	A	A	G	A	A	G	A	A	A	A	A	A	G
14	32460279	rs247372541	A/C	I:Chat	Chat	C	C	A	C	C	A	C	C	C	C	C	C	A
14	32461523	rs30313789	C/T	I:Chat	Chat	T	T	C	T	T	C	T	T	T	T	T	T	C
14	32461553	rs233608149	A/G	I:Chat	Chat	G	G	G	G	G	A	G	G	G	G	G	G	G
14	32461562	rs31435610	A/G	I:Chat	Chat	G	G	A	G	G	A	G	G	G	G	G	G	A
14	32461877	rs232865661	A/G	I:Chat	Chat	G	G	A	G	G	A	G	G	G	G	G	G	A
14	32462026	rs46136354	C/G/T	I:Chat	Chat	T	T	C	T	T	C	T	T	T	T	T	T	C
14	32462267	rs30935160	C/T	I:Chat	Chat		T	C	T	T	C	T	T	T	T	T	T	C
14	32462279	rs225318512	indel	I:Chat	Chat		0											2
14	32462281	rs231260684	indel	I:Chat	Chat		0	1
14	32464146	rs237838284	A/G	I:Chat Cs:Slc18a3:Y:93	Chat	G	G	A	G	G	A	G	G	G	G	G	G	A

## Sheet: Ric3
chr	bp38	rs	observed	dbsnp142annot	requested	DBA/1J	C57BL/6J	LP/J	BALB/cJ	DBA/2J	129S1/SvImJ	CBA/J	C3H/HeJ	A/J	AKR/J	FVB/NJ	BTBR T<+> Itpr3<tf>/J	NZB/BlNJ
7	109046515	rs226577911	indel	I:Ric3	Ric3		0								1

## Sheet: Bche
chr	bp38	rs	observed	dbsnp142annot	requested	DBA/1J	C57BL/6J	LP/J	BALB/cJ	DBA/2J	129S1/SvImJ	CBA/J	C3H/HeJ	A/J	AKR/J	FVB/NJ	BTBR T<+> Itpr3<tf>/J	NZB/BlNJ
3	73635862	rs260007792	C/T	U3:Bche	Bche	C	C	C	C	C	C	C	C	C	T	T	C	C
3	73635975	rs31491474	A/G	U3:Bche	Bche	G	G	A	G	G	A	G	G	A	G	G	A	A
3	73636115	rs30256587	G/T	U3:Bche	Bche	G	G	T	G	G	T	G	G	T	G	G	T	T
3	73636211	rs30746902	A/C	U3:Bche	Bche	A	A	C	A	A	C	A	A	C	A	A	C	C
3	73636417	rs31547694	A/C/G	U3:Bche	Bche	C	C	A	C	C	A	C	C	A	C	C	A	A
3	73636670	rs30896490	A/G	U3:Bche	Bche	G	G	A	G	G	A	G	G	A	G	G	A	A
3	73638190	rs244018875	indel	U3:Bche	Bche		0	1			1			1			1	1
3	73638204	rs47565486	A/G	U3:Bche	Bche	A	A	G	A	A	G	A	A	G	G	G	G	G
3	73638645	rs31024577	A/T	U3:Bche	Bche	A	A	A	A	A	A	A	A	A	T	T	A	A
3	73639033	rs3724107	C/T	U3:Bche	Bche	T	T	C	T	T	C	T	T	C	C	C	C	C
3	73639675	rs31025340	A/T	U3:Bche	Bche	A	A	T	A	A	T	A	A	T	A	A	T	T
3	73640275	rs31015637	C/T	I:Bche	Bche	C	C	T	C	C	T	C	C	T	C	C	T	T
3	73640549	rs31025343	A/G	I:Bche	Bche	A	A	G	A	A	G	A	A	G	A	A	G	G
3	73640750	rs235588324	indel	I:Bche	Bche		0	1			1			1	1	1	1	1
3	73640764	rs31026225	A/G	I:Bche	Bche	G	G	G	G	G	G	G	G	G	A	A	G	G
3	73640814	rs221420788	indel	I:Bche	Bche		0	1			1			1			1	1
3	73640868	rs30695717	A/G	I:Bche	Bche	G	G	A	G	G	A	G	G	A	G	G	A	A
3	73640912	rs30954663	A/C	I:Bche	Bche	A	A	C	A	A	C	A	A	C	A	A	C	C
3	73640995	rs31019045	C/T	I:Bche	Bche	T	T	C	T	T	C	T	T	C	T	T	C	C
3	73641170	rs30309646	A/G	I:Bche	Bche	A	A	G	A	A	G	A	A	G	A	A	G	G
3	73641172	rs213706787	indel	I:Bche	Bche		0	1			1			1			1	1
3	73641571	rs259100910	indel	I:Bche	Bche		0	1			1			1			1	1
3	73641761	rs31019047	A/T	I:Bche	Bche	A	A	T	A	A	T	A	A	T	A	A	T	T
3	73642071	rs30658396	C/T	I:Bche	Bche	C	C	T	C	C	T	C	C	T	C	C	T	T
3	73642485	rs31019776	C/G	I:Bche	Bche	G	G		G				G	C	G	G	C	C
3	73642523	rs231136501	indel	I:Bche	Bche		0							1			1	1
3	73642619	rs31196213	C/T	I:Bche	Bche	T	T	C	T	T	C	T	T	C	T	T	C	C
3	73642792	rs31297580	G/T	I:Bche	Bche	T	T	G	T	T	G	T	T	G	T	T	G	G
3	73642904	rs30309951	A/T	I:Bche	Bche	A	A	T	A	A	T	A	A	T	A	A	T	T
3	73643087	rs31007790	A/G	I:Bche	Bche	G	G	A	G	G	A	G	G	A	G	G	A	A
3	73643269	rs30894731	G/T	I:Bche	Bche	T	T	G	T	T	G	T	T	G	T	T	G	G
3	73643334	rs50814889	C/T	I:Bche	Bche	C	C	T	C	C	T	C	C	T	C	C	T	T
3	73643485	rs30410937	C/T	I:Bche	Bche	T	T	C	T	T	C	T	T	C	T	T	C	C
3	73643679	rs30506122	A/T	I:Bche	Bche	T	T	A	T	T	A	T	T	A	T	T	A	A
3	73643835	rs30991608	A/G	I:Bche	Bche	G	G	A	G	G	A	G	G	A	G	G	A	A
3	73644325	rs31020925	C/T	I:Bche	Bche	C	C	T	C	C	T	C	C	T	C	C	T	T
3	73644933	rs31020927	C/T	I:Bche	Bche	T	T	C	T	T	C	T	T	C	T	T	C	C
3	73645097	rs30316765	A/G	I:Bche	Bche	A	A	G	A	A	G	A	A	G	A	A	G	G
3	73645302	rs31290078	C/T	I:Bche	Bche	T	T	C	T	T	C	T	T	C	T	T	C	C
3	73645704	rs33860750	C/T	I:Bche	Bche	C	C	T	C	C	T	C	C	T	C	C	T	T
3	73646350	rs585050375	C/G/T	I:Bche	Bche	G	G	T	G	G	T	G	G	T	G	G	T	T
3	73646458		indel		Bche		0							1			1	1
3	73646465	rs257795694	indel	I:Bche	Bche		0	1			1							1
3	73646499	rs52343558	G/T	I:Bche	Bche	T	T		T	T	T	T	T		T	T	T	G
3	73646508		indel		Bche		0		1			1	1
3	73646571	rs581748357	C/T	I:Bche	Bche	T	T	C	T	T	C	T	T	C	T	T	C	C
3	73646954		indel		Bche		0	1			1			1			1	1
3	73647533	rs30457841	C/T	I:Bche	Bche	C	C	T	C	C	T	C	C	T	C	C	T	T
3	73647992	rs31744991	G/T	I:Bche	Bche	G	G	T	G	G		G	G	T	G	G	T	T
3	73648047	rs30846301	A/T	I:Bche	Bche	A	A	T	A	A	T	A	A	T	A	A	T	T
3	73648274	rs30411020	C/T	I:Bche	Bche	T	T	C	T	T	C	T	T	C	T	T	C	C
3	73648346	rs30152353	C/T	I:Bche	Bche	T	T	C	T	T	C	T	T	C	T	T	C	C
3	73649425	rs30991269	A/G	I:Bche	Bche	G	G	A	G	G	A	G	G	A	G	G	A	A
3	73649549	rs246738732	indel	I:Bche	Bche		0							1			2
3	73649658	rs31336089	C/T	I:Bche	Bche	C	C	T	C	C	T	C	C	T	C	C	T	T
3	73649665	rs30651772	G/T	I:Bche	Bche	T	T	G	T	T	G	T	T	G	T	T	G	G
3	73650292	rs218125476	indel	I:Bche	Bche		0	1			1			1	2	2	1	1
3	73651296	rs31024225	C/G	I:Bche	Bche	G	G	C	G	G	C	G	G	C	G	G	C	C
3	73651553	rs31024229	A/G	I:Bche	Bche	A	A	G	A	A	G	A	A	G	A	A	G	G
3	73651652	rs50532588	A/G	I:Bche	Bche	A	A	G	A	A	G	A	A	G	A	A	G	G
3	73651893	rs265789952	indel	I:Bche	Bche		0								1	1
3	73651914	rs227343500	indel	I:Bche	Bche		0	1			1			1			1	1
3	73651920	rs52414167	C/T	I:Bche	Bche	T	T	C	T	T	C	T	T		T	T	C	T
3	73651946	rs214191323	indel	I:Bche	Bche		0	1			1			1	1	1	1	1
3	73652016	rs31024231	A/C	I:Bche	Bche	C	C	A	A	C	A	A	A	A	A	A	A	A
3	73652079		indel		Bche		0	1			1			1	1	1		1
3	73652125		indel		Bche		0				1			1			1
3	73652150	rs241431851	indel	I:Bche	Bche		0	1			1			1			1	1
3	73652216	rs49234167	A/C/T	I:Bche	Bche	A	A	T	A	A	T	A	A	T	A	A	T	T
3	73652396	rs254607197	indel	I:Bche	Bche		0	1			1			1			1	1
3	73653266	rs259639728	C/T	I:Bche	Bche	C	C	T	C	C	T	C	C	T	C	C	T	T
3	73653357	rs30457674	A/G	I:Bche	Bche	A	A	G	A	A	G	A	A	G	A	A	G	G
3	73653671	rs238796897	indel	I:Bche	Bche		0	1			1			1			1	1
3	73654119	rs31140860	A/G	I:Bche	Bche	A	A	G	A	A	G	A	A	G	A	A	G	G
3	73654141		indel		Bche		0	1			1			1			1	1
3	73654445	rs31730247	A/G	I:Bche	Bche	A	A	G	A	A	G	A	A	G	A	A	G	G
3	73654670	rs30503909	A/T	I:Bche	Bche	T	T	A	T	T	A	T	T	A	T	T	A	A
3	73655010	rs235437448	indel	I:Bche	Bche		0	1			1			1	1	1	1	1
3	73655141	rs31527917	C/G	I:Bche	Bche	C	C	G	C	C	G	C	C	G	G	G	G	G
3	73655868	rs31743472	A/G	I:Bche	Bche	G	G	A	G	G	A	G	G	A	G	G	A	A
3	73656306	rs30797766	A/G	I:Bche	Bche	G	G	A	G	G	A	G	G	A	G	G	A	A
3	73656938	rs30950290	A/C	I:Bche	Bche	C	C	A	C	C	A	C	C	A	C	C	A	A
3	73657291	rs31704994	A/G	I:Bche	Bche	G	G	A	G	G	A	G	G	A	G	G	A	A
3	73657416	rs30987415	A/C/T	I:Bche	Bche	T	T	A	T	T	A	T	T	A	T	T	A	A
3	73657478	rs31249063	G/T	I:Bche	Bche	G	G	T	G	G	T	G	G	T	G	G	T	T
3	73657651	rs30670004	A/G	I:Bche	Bche	G	G	A	G	G	A	G	G	A	G	G	A	A
3	73657867	rs30061550	A/G	I:Bche	Bche	G	G	A	G	G	A	G	G	A	G	G	A	A
3	73657888	rs265717792	indel	I:Bche	Bche		0			0				1	1	1
3	73657997	rs238755864	indel	I:Bche	Bche		0							1	2	2		0
3	73661800	rs30458094	C/T	I:Bche	Bche	C	C	T	T	C	T	T	T	T			T	T
3	73662182	rs30152727	A/G	I:Bche	Bche	A	A	G	A	A	G	A	A	G	A	A	G	G
3	73662454	rs253267708	indel	I:Bche	Bche		0				1	3		1				1
3	73662484				Bche	C	C	G	C	C		C	C	C	C	C	G	G
3	73663072	rs257129483	indel	I:Bche	Bche		0	1			1			1				1
3	73663621	rs236901539	indel	I:Bche	Bche		0	1							2	2		1
3	73663711	rs30752507	C/G	I:Bche	Bche	G	G	C	G	G	C	G	G	C	G	G	C	C
3	73663741	rs31019269	C/T	I:Bche	Bche	C	C	T	C	C	T	C	C	T	C	C	T	T
3	73664483		indel		Bche		0					1	1			1
3	73664531		indel		Bche		0				1
3	73664841	rs31020085	C/T	I:Bche	Bche	T	T	C	T	T	C	T	T	C	T	T	C	C
3	73665003	rs243655764	indel	I:Bche	Bche		0			2		3		3
3	73665125	rs266213401	indel	I:Bche	Bche		0							1
3	73665485	rs46209935	A/C	I:Bche	Bche	A	A	C	A	A	C	A	A	C	C	C	C	C
3	73665938	rs229793424	indel	I:Bche	Bche		0	1									1	1
3	73666969	rs30758150	C/G	I:Bche	Bche	G	G	C	C	G	C	C	C	C	C	C	C	C
3	73667158	rs31007770	A/C/T	I:Bche	Bche	A	A	T	A	A	T	A	A	T	A	A	T	T
3	73667194	rs30961634	A/C/T	I:Bche	Bche	A	A	T	A	A	T	A	A	T	A	A	T	T
3	73667602	rs30770282	A/C	I:Bche	Bche	G	G	T	G	G	T	G	G	T	G	G	T	T
3	73668138	rs30828317	C/T	I:Bche	Bche	A	A	G	A	A	G	A	A	G	A	A	G	G
3	73668420	rs246181305	indel	I:Bche	Bche		0	1			1			1			1	1
3	73668742	rs30617747	A/T	I:Bche	Bche	A	A	T	A	A	T	A	A	T	A	A	T	T
3	73668812	rs252575972	A/G	I:Bche	Bche	G	G	G	G	G	G	G	G	G	A	A	G	G
3	73668955	rs30946688	A/C	I:Bche	Bche	T	T	G	T	T	G	T	T	G	T	T	G	G
3	73668956	rs30618880	A/T	I:Bche	Bche	T	T	A	T	T	A	T	T	A	T	T	A	A
3	73669132	rs31017957	G/T	I:Bche	Bche	C	C	A	C	C	A	C	C	A	C	C	A	A
3	73669210	rs30623736	C/T	I:Bche	Bche	G	G	A	G	G	A	G	G	A	G	G	A	A
3	73669405	rs31009820	C/G	I:Bche	Bche	C	C	G	C	C	G	C	C	G	C	C	G	G
3	73669627	rs31021785	A/G	I:Bche	Bche	G	G	G	A	G	G	A	A	G	G	G	G	G
3	73669862	rs30669513	A/C	I:Bche	Bche	G	G	T	G	G	T	G	G	T	G	G	T	T
3	73669865	rs30625099	C/T	I:Bche	Bche	A	A	G	A	A	G	A	A	G	A	A	G	G
3	73670317	rs582320016	A/T	I:Bche	Bche	A	A	T	A	A	T	A	A	T	A	A	T	T
3	73670386		indel		Bche		0										1
3	73670388		indel		Bche		0							1
3	73670404		indel		Bche		0	0										1
3	73670420		indel		Bche		0					3			1	1	2
3	73670616	rs30830401	A/C	I:Bche	Bche	T	T	G	T	T	G	T	T	G	T	T	G	G
3	73670762	rs229985534	indel	I:Bche	Bche		0								1
3	73670967	rs228611267	indel	I:Bche	Bche		0	1			1			1			1	1
3	73670995	rs580632718	C/G	I:Bche	Bche	C	C	G	C	C	G	C	C	C	C	C	G	G
3	73671001	rs30813697	C/G	I:Bche	Bche	C	C	G	C	C	G	C	C	G	C	C	G	G
3	73671110	rs30780746	C/G	I:Bche	Bche	G	G	C	G	G	C	G	G	C	G	G	C	C
3	73671170	rs48382081	A/G	I:Bche	Bche	G	G	A	G	G	A	G	G	A	G	G	A	A
3	73671384	rs51190923	G/T	I:Bche	Bche	T	T	G	T	T	G	T	T	G	T	T	G	G
3	73671683	rs31022726	C/T	I:Bche	Bche	T	T	C	T	T	C	T	T	C	T	T	C	C
3	73672134	rs216025090	indel	I:Bche	Bche		0	1			1			1			1	1
3	73672390	rs250985406	indel	I:Bche	Bche		0	1			1							1
3	73672659	rs31022732	C/T	I:Bche	Bche	C	C	T	C	C	T	C	C	T	C	C	T	T
3	73672776	rs243505619	indel	I:Bche	Bche		0	1			1			1			1	1
3	73672847	rs31023384	C/T	I:Bche	Bche	T	T	C	T	T	C	T	T	C	T	T	C	C
3	73672942	rs50648413	G/T	I:Bche	Bche	G	G	T	G	G	T	G	G	T	G	G	T	T
3	73672943	rs240390547	G/T	I:Bche	Bche	T	T	G	T	T	G	T	T	G	T	T	G	G
3	73673006	rs30807026	A/C	I:Bche	Bche	A	A	C	A	A	C	A	A	C	A	A	C	C
3	73673395	rs3693736	C/G	I:Bche	Bche	C	C	G	C	C	G	C	C	G	C	C	G	G
3	73673425	rs3693802	A/G	I:Bche	Bche	A	A	G	A	A	G	A	A	G	A	A	G	G
3	73673488	rs253729941	G/T	I:Bche	Bche	G	G	G	G	G	G	G	G	G	T	T	G	G
3	73673673	rs31193556	A/G	I:Bche	Bche	A	A	G	A	A	G	A	A	G	A	A	G	G
3	73673757	rs30159205	A/G	I:Bche	Bche	G	G	A	G	G	A	G	G	A	G	G	A	A
3	73673981	rs251189553	indel	I:Bche	Bche		0	1			1			1			1	1
3	73673988				Bche	G	G	A	G	G		G	G		G	G
3	73674034	rs31024734	A/G	I:Bche	Bche	A	A	G	A	A	G	A	A	G	A	A	G	G
3	73674075	rs31024735	A/G	I:Bche	Bche	A	A	G	A	A	G	A	A	G	A	A	G	G
3	73674273	rs30209401	A/C/G	I:Bche	Bche	G	G	A	G	G	A	G	G	A	G	G	A	A
3	73674356	rs31024738	A/C	I:Bche	Bche	A	A	C	A	A	C	A	A	C	A	A	C	C
3	73674632	rs257086396	indel	I:Bche	Bche		0	1			1			1			1	1
3	73675121	rs31025686	A/G	I:Bche	Bche	A	A	G	A	A	G	A	A	G	A	A	G	G
3	73675877	rs30018845	A/G	I:Bche	Bche	A	A	G	A	A	G	A	A	G	A	A	G	G
3	73676024	rs212417919	indel	I:Bche	Bche		0	1			1			1	2		1	1
3	73676075	rs223386187	indel	I:Bche	Bche		0	1			1						1	1
3	73676083		indel		Bche		0							1
3	73676094	rs253404234	indel	I:Bche	Bche		0								1	1
3	73676297	rs30357828	A/G	I:Bche	Bche	A	A	G	A	A	G	A	A	G	A	A	G	G
3	73676460	rs30104950	C/T	I:Bche	Bche	T	T	C	T	T	C	T	T	C	T	T	C	C
3	73676836	rs3697210	C/T	I:Bche	Bche	T	T	C	T	T	C	T	T	C	T	T	C	C
3	73676893	rs3697736	A/G	I:Bche	Bche	G	G	A	G	G	A	G	G	A	G	G	A	A
3	73677168	rs30810744	A/G	I:Bche	Bche	A	A	G	A	A	G	A	A	G	A	A	G	G
3	73677209	rs30067876	A/G	I:Bche	Bche	A	A	G	A	A	G	A	A	G	A	A	G	G
3	73677223	rs31681931	A/G	I:Bche	Bche	A	A	G	A	A	G	A	A	G	A	A	G	G
3	73678753	rs31020510	C/T	I:Bche	Bche	T	T	C	T	T	C	T	T	C	T	T	C	C
3	73678783	rs31020512	A/G	I:Bche	Bche	G	G	A	G	G	A	G	G	A	G	G	A	A
3	73678845	rs31296504	G/T	I:Bche	Bche	T	T	G	T	T	G	T	T	G	G	G	G	G
3	73679068	rs31021364	C/T	I:Bche	Bche	C	C	T	C	C	T	C	C	T	C	C	T	T
3	73679075	rs254531048	indel	I:Bche	Bche		0	1							2	2	1
3	73679810	rs31021371	A/G	I:Bche	Bche	G	G	A	G	G	A	G	G	A	G	G	A	A
3	73682198	rs214281695	C/T	I:Bche	Bche	C	C	C	C	C	C	C	C	T	C	C	C	C
3	73682818	rs231343187	A/G	I:Bche	Bche	G	G	G	G	G	G	G	G	G	A	A	G	G
3	73682986	rs31092345	A/G	I:Bche	Bche	A	A	A	A	A	A	A	A	G	A	A	A	A
3	73683031	rs242242357	indel	I:Bche	Bche		0								1	1
3	73683032				Bche	A	A	A	A	A	A	A	A	A	C	C	A	A
3	73683033				Bche	A	A	A	A	A	A	A	A	A	T		A	A
3	73685341	rs213215871	indel	I:Bche	Bche		0										1	1
3	73685670	rs237589912	indel	I:Bche	Bche		0	1			1			1			1	1
3	73685762	rs225301824	indel	I:Bche	Bche		0										1
3	73685797		indel		Bche		0										1
3	73686212	rs226784609	A/G	I:Bche	Bche	G	G	G	G	G	G	G	G	G	A	A	G	G
3	73687539	rs30706856	A/G	I:Bche	Bche	G	G	A	G	G	A	G	G	A	G	G	A	A
3	73690258	rs254608508	C/T	I:Bche	Bche	C	C	C	T	C	C	T	T	C	C	C	C	C
3	73691286	rs240463841	indel	I:Bche	Bche		0	1			1			1			1	1
3	73691628	rs31143948	C/T	I:Bche	Bche	T	T	C	T	T	C	T	T	C	T	T	C	C
3	73692426	rs31024637	C/G	I:Bche	Bche	C	C	C	C	C	C	C	C	C	C	G	C	C
3	73692742	rs30302915	A/G	I:Bche	Bche	G	G	A	G	G	A	G	G	A	G	G	A	A
3	73693025	rs31437068	C/T	I:Bche	Bche	C	C	T	C	C	T	C	C	T	C	C	T	T
3	73693253	rs238079161	indel	I:Bche	Bche		0								1		0
3	73693400	rs30409044	A/C	I:Bche	Bche	C	C	A	C	C	A	C	C	A	C	C	A	A
3	73693717				Bche	G	G	G	G	G	G	G	G	G	G	G	G	A
3	73694044	rs30263975	C/T	I:Bche	Bche	T	T	C	T	T	C	T	T	C	T	T	C	C
3	73694375	rs30352643	A/C	I:Bche	Bche	C	C	A	C	C	A	C	C	A	C	C	A	A
3	73694392	rs239418112	G/T	I:Bche	Bche	G	G	T	G	G	T	G	G	T	G	G	T	T
3	73694615	rs255695371	G/T	I:Bche	Bche	T	T	G	T	T	G	T	T	G	T	T	G	G
3	73694663	rs30985257	A/C	I:Bche	Bche	A	A	C	A	A	C	A	A	C	A	A	C	C
3	73695069	rs212311285	A/G	I:Bche	Bche	G	G	A	G	G	A	G	G	A	G	G	A	A
3	73695134	rs255499587	A/G	I:Bche	Bche	G	G	G	G	G	G	G	G	G	A	A	G	G
3	73695282	rs30356096	A/G	I:Bche	Bche	A	A	G	A	A	G	A	A	G	G	G	G	G
3	73696014	rs31250658	A/G	I:Bche	Bche	A	A	G	A	A	G	A	A	G	A	A	G	G
3	73696096	rs31690250	G/T	I:Bche	Bche	T	T	G	T	T	G	T	T	G	T	T	G	G
3	73696646	rs30760700	A/C	I:Bche	Bche	A	A	C	A	A	C	A	A	C	C	C	C	C
3	73696675	rs234134730	indel	I:Bche	Bche		0	1			1			1			1	1
3	73696777	rs31024643	C/T	I:Bche	Bche	C	C	T	C	C	T	C	C	T	C	C	T	T
3	73697500	rs30700385	C/T	I:Bche	Bche	T	T	C	T	T	C	T	T	C	T	T	C	C
3	73697510	rs30651088	A/G	I:Bche	Bche	A	A	G	A	A	G	A	A	G	A	A	G	G
3	73697542	rs31026596	A/T	I:Bche	Bche	T	T	T	T	T	T	T	T	T	A	A	T	T
3	73697800	rs31026600	A/G	I:Bche	Bche	A	A	G	A	A	G	A	A	G	G	G	G	G
3	73698151	rs31027428	C/T	I:Bche	Bche	C	C	T	C	C	T	C	C	T	C	C	T	T
3	73699287	rs31292192	A/G	I:Bche	Bche	A	A	G	A	A	G	A	A	G	G	G	G	G
3	73699330	rs31027432	C/T	I:Bche	Bche	C	C	C	C	C	C	C	C	C	T	T	C	C
3	73699890	rs264916795	indel	I:Bche	Bche		0	1			1	0			1	1	1
3	73699898		indel		Bche		0	1			1						1	1
3	73699910		indel		Bche		0				0			1
3	73700653	rs31028176	C/T	Cn:Bche:GE:480	Bche	C	C	C	C	C	C	C	C	T	C	C	C	C
3	73700712	rs30216827	C/T	Cs:Bche:P:460	Bche	C	C	T	C	C	T	C	C	T	C	C	T	T
3	73700919	rs31028178	G/T	Cn:Bche:SR:391	Bche	G	G	G	G	G	G	G	G	G	T	T	G	G
3	73702261	rs30947342	A/G	I:Bche	Bche	G	G	A	G	G	A	G	G	A	A	A	A	A
3	73702528	rs30215238	A/G	I:Bche	Bche	A	A	G	A	A	G	A	A	G	A	A	G	G
3	73702644	rs263360076	indel	I:Bche	Bche		0		2		1							1
3	73702646		indel		Bche		0							1
3	73702929	rs31020050	C/T	I:Bche	Bche	C	C	T	C	C	T	C	C	T	C	C	T	T
3	73703549	rs31020052	A/C	I:Bche	Bche	C	C	A	C	C	A	C	C	A	C	C	A	A
3	73703933	rs259013809	indel	I:Bche	Bche		0								1	1
3	73704142	rs31333912	A/G	I:Bche	Bche	G	G	A	G	G	A	G	G	A	G	G	A	A
3	73704703	rs31021056	C/T	I:Bche	Bche	T	T	C	T	T	C	T	T	C	T	T	C	C
3	73704849	rs31021058	A/G	I:Bche	Bche	A	A	G	A	A	G	A	A	G	A	A	G	G
3	73704855	rs31021060	C/G	I:Bche	Bche	C	C	G	C	C	G	C	C	G	C	C	G	G
3	73704989	rs255162696	indel	I:Bche	Bche		0	1			1			1			1	1
3	73706808	rs31005880	C/T	I:Bche	Bche	C	C	T	C	C	T	C	C	T	C	C	T	T
3	73706966	rs31022520	A/G	I:Bche	Bche	G	G	A	G	G	A	G	G	A	G	G	A	A
3	73708045	rs250825709	indel	I:Bche	Bche		0	1			1			1			1	1
3	73708238	rs30055939	A/G	U5:Bche	Bche	A	A	G	A	A	G	A	A	G	A	A	G	G

## Sheet: Chrna7
chr	bp38	rs	observed	dbsnp142annot	requested	DBA/1J	C57BL/6J	LP/J	BALB/cJ	DBA/2J	129S1/SvImJ	CBA/J	C3H/HeJ	A/J	AKR/J	FVB/NJ	BTBR T<+> Itpr3<tf>/J	NZB/BlNJ
7	63099210	rs33061173	C/T	U3:Chrna7	Chrna7	T	C	C	C	T	C	C	C	C	C	C	C	C
7	63099583	rs31340375	A/G	Cs:Chrna7:L:384	Chrna7	A	G	G	G	A	G	G	G	G	G	G	G	G
7	63099788	rs31813339	A/T	I:Chrna7	Chrna7	T	A	A	A	T	A	A	A	A	A	A	A	A
7	63099829	rs32134265	A/C	I:Chrna7	Chrna7	A	C	C	C	A	C	C	C	C	C	C	C	C
7	63099837	rs31819553	C/T	I:Chrna7	Chrna7	T	C	C	C	T	C	C	C	C	C	C	C	C
7	63099939	rs33062374	A/C/G	I:Chrna7	Chrna7	C	A	A	A	C	A	A	A	A	A	A	A	A
7	63100106	rs220050791	indel	I:Chrna7	Chrna7	1	0			1
7	63100743	rs47246855	C/T	I:Chrna7	Chrna7	C	T	T	T	C	T	T	T	T	T	T	T	T
7	63100883	rs31091982	A/G	I:Chrna7	Chrna7	G	A	A	A	G	A	A	A	A	A	A	A	A
7	63100966	rs31057802	A/G	I:Chrna7	Chrna7	A	G	G	G	A	G	G	G	G	G	G	G	G
7	63101250	rs31852257	C/G	I:Chrna7	Chrna7	G	C	C	C	G	C	C	C	C	C	C	C	C
7	63101287	rs32158008	C/T	I:Chrna7	Chrna7	C	T	T	T	C	T	T	T	T	T	T	T	T
7	63101323	rs32399805	A/G	I:Chrna7	Chrna7	A	G	G	G	A	G	G	G	G	G	G	G	G
7	63101389	rs32078301	A/G	I:Chrna7	Chrna7	G	A	A	A	G	A	A	A	A	A	A	A	A
7	63101494	rs31757575	A/G	I:Chrna7	Chrna7	G	A	A	A	G	A	A	A	A	A	A	A	A
7	63102452	rs31828539	C/T	I:Chrna7	Chrna7	C	T	T	T	C	T	T	T	T	T	T	T	T
7	63102525	rs262277707	indel	I:Chrna7	Chrna7	1	0			1
7	63102536	rs32098018	A/G	I:Chrna7	Chrna7	G	A	A	A	G	A	A	A	A	A	A	A	A
7	63102794	rs240227289	indel	I:Chrna7	Chrna7	1	0			1
7	63102835	rs32353413	A/G	I:Chrna7	Chrna7	G	A	A	A	G	A	A	A	A	A	A	A	A
7	63103192	rs228319561	indel	I:Chrna7	Chrna7		0		1	1
7	63103583	rs31468977	A/G	I:Chrna7	Chrna7	A	G	G	G	A	G	G	G	G	G	G	G	G
7	63103737	rs51279797	C/T	I:Chrna7	Chrna7	C	T	T	T	C	T	T	T	T	T	T	T	T
7	63103837	rs13479294	A/T	Cs:Chrna7:T:311	Chrna7	A	T	T	T	A	T	T	T	T	T	T	T	T
7	63103934	rs32465367	C/T	I:Chrna7	Chrna7	C	T	T	T	C	T	T	T	T	T	T	T	T
7	63104010	rs31578428	A/G	I:Chrna7	Chrna7	A	G	G	G	A	G	G	G	G	G	G	G	G
7	63104041	rs32263587	C/T	I:Chrna7	Chrna7	C	T	T	T	C	T	T	T	T	T	T	T	T
7	63104159	rs31484364	A/G	I:Chrna7	Chrna7	G	A	A	A	G	A	A	A	A	A	A	A	A
7	63104262	rs31610037	A/G	I:Chrna7	Chrna7	A	G	G	G	A	G	G	G	G	G	G	G	G
7	63104463		indel		Chrna7	1	0
7	63104477		indel		Chrna7	1	0			1
7	63104528		indel		Chrna7	1	0
7	63104552	rs246087838	indel	I:Chrna7	Chrna7		0	1			1	1	1		1		1
7	63104577	rs254390941	indel	I:Chrna7	Chrna7	1	0			1
7	63104628	rs32046522	A/G	I:Chrna7	Chrna7	G	A	A	A	G	A	A	A	A	A	A	A	A
7	63104755	rs246230522	indel	I:Chrna7	Chrna7	1	0			1
7	63104792	rs31873798	A/G	I:Chrna7	Chrna7	A	G	G	G	A	G	G	G	G	G	G	G	G
7	63105348	rs32286764	A/G	I:Chrna7	Chrna7	A	G	G	G	A	G	G	G	G	G	G	G	G
7	63105398	rs32499305	A/G	I:Chrna7	Chrna7	A	G	G	G	A	G	G	G	G	G	G	G	G
7	63105455	rs31694934	C/T	I:Chrna7	Chrna7	T	C	C	C	T	C	C	C	C	C	C	C	C
7	63105577	rs234289873	indel	I:Chrna7	Chrna7	1	0			1
7	63105851	rs31544317	C/T	I:Chrna7	Chrna7	T	C	C	C	T	C	C	C	C	C	C	C	C
7	63105975	rs31395031	C/T	I:Chrna7	Chrna7	C	T	T	T	C	T	T	T	T	T	T	T	T
7	63106262	rs212047761	indel	I:Chrna7	Chrna7	1	0			1
7	63106282		indel		Chrna7	1	0			1
7	63106478	rs32033066	G/T	I:Chrna7	Chrna7	G	T	T	T	G	T	T	T	T	T	T	T	T
7	63106769	rs31646247	C/T	I:Chrna7	Chrna7	T	C	C	C	T	C	C	C	C	C	C	C	C
7	63106778	rs261874777	indel	I:Chrna7	Chrna7	1	0			1
7	63106861	rs31373106	G/T	I:Chrna7	Chrna7	T	G	G	G	T	G	G	G	G	G	G	G	G
7	63107082	rs32422404	C/G	I:Chrna7	Chrna7	G	C	C	C	G	C	C	C	C	C	C	C	C
7	63107161	rs31623625	A/G	I:Chrna7	Chrna7	G	A	A	A	G	A	A	A	A	A	A	A	A
7	63107200	rs31650903	C/T	I:Chrna7	Chrna7	C	T	T	T	C	T	T	T	T	T	T	T	T
7	63107280	rs32202796	C/T	I:Chrna7	Chrna7	C	T	T	T	C	T	T	T	T	T	T	T	T
7	63107371	rs32438604	C/G	I:Chrna7	Chrna7	C	G	G	G	C	G	G	G	G	G	G	G	G
7	63107518	rs32303888	A/G	I:Chrna7	Chrna7	G	A	A	A	G	A	A	A	A	A	A	A	A
7	63107770	rs32059239	C/G	I:Chrna7	Chrna7	C	G	G	G	C	G	G	G	G	G	G	G	G
7	63107812	rs31432570	C/T	I:Chrna7	Chrna7	T	C	C	C	T	C	C	C	C	C	C	C	C
7	63108147	rs240165978	indel	I:Chrna7	Chrna7	1	0			1
7	63108158		indel		Chrna7	1	0			1
7	63108241	rs253330613	indel	I:Chrna7	Chrna7	1	0			1
7	63108892	rs31528927	C/T	I:Chrna7	Chrna7	C	T	T	T	C	T	T	T	T	T	T	T	T
7	63109092	rs32069593	C/T	I:Chrna7	Chrna7	C	T	T	T	C	T	T	T	T	T	T	T	T
7	63109314	rs32476543	G/T	I:Chrna7	Chrna7	T	G	G	G	T	G	G	G	G	G	G	G	G
7	63109583	rs33060311	A/G	I:Chrna7	Chrna7	A	G	G	G	A	G	G	G	G	G	G	G	G
7	63110046	rs32239691	A/T	I:Chrna7	Chrna7	A	T	T	T	A	T	T	T	T	T	T	T	T
7	63110093	rs31232653	A/C	I:Chrna7	Chrna7	A	C	C	C	A	C	C	C	C	C	C	C	C
7	63110221	rs31103809	C/T	I:Chrna7	Chrna7	C	T	T	T	C	T	T	T	T	T	T	T	T
7	63110553	rs31585756	C/T	I:Chrna7	Chrna7	T	C	C	C	T	C	C	C	C	C	C	C	C
7	63110608	rs31338945	A/G	I:Chrna7	Chrna7	G	A	A	A	G	A	A	A	A	A	A	A	A
7	63110651	rs31592268	A/G	I:Chrna7	Chrna7	G	A	A	A	G	A	A	A	A	A	A	A	A
7	63110749	rs32196629	A/G	I:Chrna7	Chrna7	A	G	G	G	A	G	G	G	G	G	G	G	G
7	63110887	rs31729941	C/T	I:Chrna7	Chrna7	T	C	C	C	T	C	C	C	C	C	C	C	C
7	63111552	rs32218369	C/T	I:Chrna7	Chrna7	T	C	C	C	T	C	C	C	C	C	C	C	C
7	63111705	rs50410333	A/G	I:Chrna7	Chrna7	A	G	G	G	A	G	G	G	G	G	G	G	G
7	63111731	rs46406770	C/T	I:Chrna7	Chrna7	C	T	T	T	C	T	T	T	T	T	T	T	T
7	63111760	rs49332568	C/T	I:Chrna7	Chrna7	T	C	C	C	T	C	C	C	C	C	C	C	C
7	63111764	rs259502499	indel	I:Chrna7	Chrna7	1	0			1
7	63111894	rs46900563	A/G	I:Chrna7	Chrna7	G	A	A	A	G	A	A	A	A	A	A	A	A
7	63111988	rs47077417	G/T	I:Chrna7	Chrna7	G	T	T	T	G	T	T	T	T	T	T	T	T
7	63112050	rs31700133	A/C	I:Chrna7	Chrna7	C	A	A	A	C	A	A	A	A	A	A	A	A
7	63112060	rs51619273	C/T	I:Chrna7	Chrna7	C	T	T	T	C	T	T	T	T	T	T	T	T
7	63112074	rs32483118	G/T	I:Chrna7	Chrna7	G	T	T	T	G	T	T	T	T	T	T	T	T
7	63112214	rs236602171	indel	I:Chrna7	Chrna7	1	0			1
7	63112305	rs233862683	C/G	I:Chrna7	Chrna7	C	G	G	G	C	G	G	G	G	G	G	G	G
7	63112473	rs31903787	A/G	I:Chrna7	Chrna7	A	G	G	G	A	G	G	G	G	G	G	G	G
7	63112679	rs253899327	G/T	I:Chrna7	Chrna7	G	T	T	T	G	T	T	T	T	T	T	T	T
7	63112680	rs219004394	G/T	I:Chrna7	Chrna7	T	G	G	G	T	G	G	G	G	G	G	G	G
7	63112686	rs245289702	indel	I:Chrna7	Chrna7	1	0			1
7	63112706	rs234597025	G/T	I:Chrna7	Chrna7	G	T	T	T	G	T	T	T	T	T	T	T	T
7	63112760	rs586674418	G/T	I:Chrna7	Chrna7	T	G	G	G		G	G	G	G	G	G	G	G
7	63112770	rs228587777	indel	I:Chrna7	Chrna7	1	0			1
7	63112928	rs47223267	A/G	I:Chrna7	Chrna7	A	G	G	G	A	G	G	G	G	G	G	G	G
7	63112934	rs231634137	A/G	I:Chrna7	Chrna7	G	A	A	A	G	A	A	A	A	A	A	A	A
7	63112980	rs33063047	A/G	I:Chrna7	Chrna7	G	A	A	A	G	A	A	A	A	A	A	A	A
7	63113001	rs33063048	C/T	I:Chrna7	Chrna7	T	C	C	C	T	C	C	C	C	C	C	C	C
7	63113048	rs215866379	indel	I:Chrna7	Chrna7		0					1	1
7	63113079	rs214578047	A/G	I:Chrna7	Chrna7	A	G	G	G	A	G	G	G	G	G	G	G	G
7	63113112	rs247049927	C/T	I:Chrna7	Chrna7	T	C	C	C	T	C	C	C	C	C	C	C	C
7	63113190	rs229998099	G/T	I:Chrna7	Chrna7	T	G	G	G	T	G	G	G	G	G	G	G	G
7	63113254	rs256367153	G/T	I:Chrna7	Chrna7	T	G	G	G	T	G	G	G	G	G	G	G	G
7	63113307	rs256978218	indel	I:Chrna7	Chrna7	1	0			1
7	63113422	rs108438890	C/T	I:Chrna7	Chrna7	C	T	T	T	C	T	T	T	T	T	T	T	T
7	63113431	rs239486978	C/T	I:Chrna7	Chrna7	C	T	T	T	C	T	T	T	T	T	T	T	T
7	63113438	rs248069995	indel	I:Chrna7	Chrna7	1	0			1
7	63113550	rs33063049	A/C	I:Chrna7	Chrna7	A	C	C	C	A	C	C	C	C	C	C	C	C
7	63113621	rs250034689	indel	I:Chrna7	Chrna7	1	0			1
7	63114150	rs31946845	A/C	I:Chrna7	Chrna7	A	C	C	C	A	C	C	C	C	C	C	C	C
7	63114154	rs50129357	A/G	I:Chrna7	Chrna7	A	G	G	G	A	G	G	G	G	G	G	G	G
7	63114412	rs262558756	indel	I:Chrna7	Chrna7	1	0			1
7	63114419				Chrna7	T	A	A	A	T	A	A	A	A	A	A	A	A
7	63114465	rs239400926	indel	I:Chrna7	Chrna7	1	0			1
7	63114523	rs33063052	A/G	I:Chrna7	Chrna7	A	G	G	G	A	G	G	G	G	G	G	G	G
7	63114567	rs230701530	C/T	I:Chrna7	Chrna7	T	C	C	C	T	C	C	C	C	C	C	C	C
7	63114569	rs252315141	A/C	I:Chrna7	Chrna7	C	A	A	A	C	A	A	A	A	A	A	A	A
7	63114599	rs33063053	A/G	I:Chrna7	Chrna7	G	A	A	A	G	A	A	A	A	A	A	A	A
7	63114634		indel		Chrna7	1	0			1
7	63114728	rs33063944	A/G	I:Chrna7	Chrna7	G	A	A	A	G	A	A	A	A	A	A	A	A
7	63114770	rs234141091	indel	I:Chrna7	Chrna7	1	0			1
7	63114794	rs261691321	A/G	I:Chrna7	Chrna7	A	G	G	G	A	G	G	G	G	G	G	G	G
7	63114795	rs33063945	C/T	I:Chrna7	Chrna7	C	T	T	T	C	T	T	T	T	T	T	T	T
7	63114838	rs33063946	C/T	I:Chrna7	Chrna7	T	C	C	C	T	C	C	C	C	C	C	C	C
7	63114847	rs33063947	C/T	I:Chrna7	Chrna7	T	C	C	C	T	C	C	C	C	C	C	C	C
7	63114876	rs264636202	indel	I:Chrna7	Chrna7	1	0			1
7	63114893	rs33063948	A/C	I:Chrna7	Chrna7	A	C	C	C	A	C	C	C	C	C	C	C	C
7	63114982	rs33063949	A/T	I:Chrna7	Chrna7	A	T	T	T	A	T	T	T	T	T	T	T	T
7	63115199	rs33063950	A/G	I:Chrna7	Chrna7	G	A	A	A	G	A	A	A	A	A	A	A	A
7	63115224	rs33063951	A/T	I:Chrna7	Chrna7	T	A	A	A	T	A	A	A	A	A	A	A	A
7	63115556	rs33064795	A/C	I:Chrna7	Chrna7	A	C	C	C	A	C	C	C	C	C	C	C	C
7	63115620	rs244835466	indel	I:Chrna7	Chrna7	1	0			1
7	63115622	rs220548670	C/T	I:Chrna7	Chrna7		T	T	T	C	T		T			T	T
7	63115683	rs233818117	indel	I:Chrna7	Chrna7	1	0			1
7	63115727	rs33064796	A/C	I:Chrna7	Chrna7	C	A	A	A	C	A	A	A	A	A	A	A	A
7	63115818	rs33064797	C/T	I:Chrna7	Chrna7	C	T	T	T	C	T	T	T	T	T	T	T	T
7	63116081	rs32254521	A/G	I:Chrna7	Chrna7	G	A	A	A	G	A	A	A	A	A	A	A	A
7	63116380	rs31424660	A/C	I:Chrna7	Chrna7	A	C	C	C	A	C	C	C	C	C	C	C	C
7	63116875	rs216504668	indel	I:Chrna7	Chrna7	1	0			1
7	63116915	rs213839378	indel	I:Chrna7	Chrna7	1	0			1
7	63117096	rs31478499	C/T	I:Chrna7	Chrna7	T	C	C	C	T	C	C	C	C	C	C	C	C
7	63117260	rs32015374	C/G	I:Chrna7	Chrna7	G	C	C	C	G	C	C	C	C	C	C	C	C
7	63117270	rs235801995	indel	I:Chrna7	Chrna7	1	0			1
7	63117314	rs31671865	C/T	I:Chrna7	Chrna7	T	C	C	C	T	C	C	C	C	C	C	C	C
7	63117749	rs32168195	C/T	I:Chrna7	Chrna7	C	T	C	C	C	C	C	C	T	C	T	C	T
7	63118027	rs31665012	A/G	I:Chrna7	Chrna7	A	G	G	G	A	G	G	G	G	G	G	G	G
7	63118146	rs32346434	A/G	I:Chrna7	Chrna7	G	A	A	A	G	A	A	A	A	A	A	A	A
7	63118222	rs211901857	A/C/T	I:Chrna7	Chrna7	A	C	C	C	A	C	C	C	C	C	C	C	C
7	63118674	rs31150501	C/T	I:Chrna7	Chrna7	T	C	C	C	T	C	C	C	C	C	C	C	C
7	63119556	rs252955862	indel	I:Chrna7	Chrna7	1	0			1
7	63121061	rs31757466	A/G	I:Chrna7	Chrna7	G	A	A	A	G	A	A	A	A	A	A	A	A
7	63121999	rs258278260	indel	I:Chrna7	Chrna7	2	0
7	63122006		indel		Chrna7	1	0			1
7	63122015		indel		Chrna7		0			1
7	63122033	rs31150117	A/G	I:Chrna7	Chrna7	A	G	G	G	A	G	G	G	G	G	G	G	G
7	63122108	rs31971375	C/T	I:Chrna7	Chrna7	C	T	T	T	C	T	T	T	T	T	T	T	T
7	63122176	rs251374807	indel	I:Chrna7	Chrna7	1	0			1
7	63122228	rs32087848	A/T	I:Chrna7	Chrna7	A	T	T	T	A	T	T	T	T	T	T	T	T
7	63122701	rs241970173	indel	I:Chrna7	Chrna7	1	0	1	1	1	1	1	1		1		1	1
7	63122960	rs32154960	A/C/G	I:Chrna7	Chrna7	A	G	G	G	A	G	G	G	G	G	G	G	G
7	63123068	rs32171173	A/G	I:Chrna7	Chrna7	G	A	A	A	G	A	A	A	A	A	A	A	A
7	63123196	rs31154035	C/T	I:Chrna7	Chrna7	T	C	C	C	T	C	C	C	C	C	C	C	C
7	63123301	rs31945931	A/C	I:Chrna7	Chrna7	C	A	A	A	C	A	A	A	A	A	A	A	A
7	63123486	rs33065970	C/T	I:Chrna7	Chrna7	C	T	T	T	C	T	T	T	T	T	T	T	T
7	63123604	rs33065971	C/T	I:Chrna7	Chrna7	T	C	C	C	T	C	C	C	C	C	C	C	C
7	63123660	rs52213625	G/T	I:Chrna7	Chrna7	G	T	T	T	G	T	T	T	T	T	T	T	T
7	63123745	rs49663602	C/G	I:Chrna7	Chrna7	C	G	C	C	C	C	C	C	G	C	G	C	C
7	63123835	rs50547602	A/G	I:Chrna7	Chrna7	G	A	A	A	G	A	A	A	A	A	A	A	A
7	63123857	rs48213173	A/G	I:Chrna7	Chrna7	G	A	A	A	G	A	A	A	A	A	A	A	A
7	63123884	rs50968153	C/T	I:Chrna7	Chrna7	C	T	T	T	C	T	T	T	T	T	T	T	T
7	63123964	rs48762694	A/C	I:Chrna7	Chrna7	A	C	C	C	A	C	C	C	C	C	C	C	C
7	63124094	rs33065972	A/T	I:Chrna7	Chrna7	T	A	A	A	T	A	A	A	A	A	A	A	A
7	63124108	rs49393070	A/G	I:Chrna7	Chrna7	G	A	A	A	G	A	A	A	A	A	A	A	A
7	63124147	rs51566743	A/C	I:Chrna7	Chrna7	A	C	C	C	A	C	C	C	C	C	C	C	C
7	63124159	rs49337757	G/T	I:Chrna7	Chrna7	T	G	G	G	T	G	G	G	G	G	G	G	G
7	63124170	rs48588642	A/G	I:Chrna7	Chrna7	G	A	A	A	G	A	A	A	A	A	A	A	A
7	63124188	rs51680771	A/C/G	I:Chrna7	Chrna7	A	G	G	G	A	G	G	G	G	G	G	G	G
7	63124207	rs46880434	C/T	I:Chrna7	Chrna7	C	T	T	T	C	T	T	T	T	T	T	T	T
7	63124232	rs33065973	C/T	I:Chrna7	Chrna7	C	T	T	T	C	T	T	T	T	T	T	T	T
7	63124236	rs51341055	C/T	I:Chrna7	Chrna7	T	C	C	C	T	C	C	C	C	C	C	C	C
7	63124317	rs236663424	G/T	I:Chrna7	Chrna7	G	T	T	T	G	T	T	T	T	T	T	T	T
7	63124482	rs33067285	C/G	I:Chrna7	Chrna7	G	C	C	C	G	C	C	C	C	C	C	C	C
7	63124530	rs33067286	A/G	I:Chrna7	Chrna7	G	A	A	A	G	A	A	A	A	A	A	A	A
7	63124660	rs33067288	G/T	I:Chrna7	Chrna7	T	G	G	G	T	G	G	G	G	G	G	G	G
7	63124942	rs32167497	C/T	I:Chrna7	Chrna7	T	C	C	C	T	C	C	C	C	C	C	C	C
7	63124961	rs32415564	A/G	I:Chrna7	Chrna7	A	G	G	G	A	G	G	G	G	G	G	G	G
7	63125215	rs31194650	C/T	I:Chrna7	Chrna7	T	C	C	C	T	C	C	C	C	C	C	C	C
7	63125268	rs32025297	A/G	I:Chrna7	Chrna7	G	A	A	A	G	A	A	A	A	A	A	A	A
7	63125273	rs32414341	A/G	I:Chrna7	Chrna7	A	G	G	G	A	G	G	G	G	G	G	G	G
7	63125296	rs32209867	A/G	I:Chrna7	Chrna7	G	A	A	A	G	A	A	A	A	A	A	A	A
7	63125347	rs580719215	A/C/G	I:Chrna7	Chrna7	A	C	C	C	A	C	C	C	C	C	C	C	C
7	63125355	rs258334986	indel	I:Chrna7	Chrna7	1	0			1
7	63125356	rs253787970	indel	I:Chrna7	Chrna7		0		1
7	63125512	rs31098350	A/G	I:Chrna7	Chrna7	G	A	A	A	G	A	A	A	A	A	A	A	A
7	63125565	rs31600934	A/G	I:Chrna7	Chrna7	A	G	G	G	A	G	G	G	G	G	G	G	G
7	63125596	rs32306865	A/G	I:Chrna7	Chrna7	G	A	A	A	G	A	A	A	A	A	A	A	A
7	63125619	rs31913545	C/G	I:Chrna7	Chrna7	C	G	G	G	C	G	G	G	G	G	G	G	G
7	63125851	rs31244296	C/T	I:Chrna7	Chrna7	T	C	C	C	T	C	C	C	C	C	C	C	C
7	63125859	rs32239755	C/T	I:Chrna7	Chrna7	T	C	C	C	T	C	C	C	C	C	C	C	C
7	63125866	rs31727440	A/G	I:Chrna7	Chrna7	G	A	A	A	G	A	A	A	A	A	A	A	A
7	63125945	rs31377643	G/T	I:Chrna7	Chrna7	G	T	T	T	G	T	T	T	T	T	T	T	T
7	63126003	rs32517387	A/G	I:Chrna7	Chrna7	A	G	G	G	A	G	G	G	G	G	G	G	G
7	63126108	rs33060624	A/G	I:Chrna7	Chrna7	A	G	G	G	A	G	G	G	G	G	G	G	G
7	63126149		indel		Chrna7		0			1
7	63126151	rs265004333	indel	I:Chrna7	Chrna7		0	1			1						0	1
7	63126337	rs223507122	C/T	I:Chrna7	Chrna7	T	C	C	C	T	C	C	C	C	C	C	C	C
7	63126338	rs245416073	C/T	I:Chrna7	Chrna7	C	T	T	T	C	T	T	T	T	T	T	T	T
7	63126435	rs47276571	G/T	I:Chrna7	Chrna7	T	G	G	G	T	G	G	G	G	G	G	G	G
7	63126640	rs240082308	indel	I:Chrna7	Chrna7	1	0			1
7	63126653	rs51645063	A/C	I:Chrna7	Chrna7	A	C	C	C	A	C	C	C	C	C	C	C	C
7	63126822	rs46552344	A/G	I:Chrna7	Chrna7	G	A	A	A	G	A	A	A	A	A	A	A	A
7	63126855	rs46355746	A/G	I:Chrna7	Chrna7	A	G	G	G	A	G	G	G	G	G	G	G	G
7	63126882	rs47934416	A/G	I:Chrna7	Chrna7	G	A	A	A	G	A	A	A	A	A	A	A	A
7	63126886	rs262365055	C/T	I:Chrna7	Chrna7	C	T	T	T	C	T	T	T	T	T	T	T	T
7	63126888	rs46464588	A/G	I:Chrna7	Chrna7	G	A	A	A	G	A	A	A	A	A	A	A	A
7	63126895	rs46805443	A/T	I:Chrna7	Chrna7	T	A	A	A	T	A	A	A	A	A	A	A	A
7	63126899	rs247847784	C/T	I:Chrna7	Chrna7	C	T	T	T	C	T	T	T	T	T	T	T	T
7	63126979	rs48690291	A/C	I:Chrna7	Chrna7	A	C	C	C	A	C	C	C	C	C	C	C	C
7	63127322	rs33060626	A/C	I:Chrna7	Chrna7	A	C	C	C	A	C	C	C	C	C	C	C	C
7	63127344	rs33060628	C/T	I:Chrna7	Chrna7	C	T	T	T	C	T	T	T	T	T	T	T	T
7	63127381	rs50584482	C/T	I:Chrna7	Chrna7	C	T	T	T	C	T	T	T	T	T	T	T	T
7	63127414	rs51653603	C/T	I:Chrna7	Chrna7	C	T	T	T	C	T	T	T	T	T	T	T	T
7	63127483	rs46262665	A/G	I:Chrna7	Chrna7	G	A	A	A	G	A	A	A	A	A	A	A	A
7	63127515	rs51896459	C/G	I:Chrna7	Chrna7	C	G	G	G	C	G	G	G	G	G	G	G	G
7	63127518	rs48294294	C/T	I:Chrna7	Chrna7	T	C	C	C	T	C	C	C	C	C	C	C	C
7	63127561	rs220990009	indel	I:Chrna7	Chrna7	1	0			1
7	63127650	rs51984345	C/T	I:Chrna7	Chrna7	T	C	C	C	T	C	C	C	C	C	C	C	C
7	63127746	rs49325264	A/C	I:Chrna7	Chrna7	A	C	C	C	A	C	C	C	C	C	C	C	C
7	63127748		indel		Chrna7	1	0			1
7	63127841	rs226511178	indel	I:Chrna7	Chrna7	1	0			1
7	63127963	rs31690623	G/T	I:Chrna7	Chrna7	T	G	G	G	T	G	G	G	G	G	G	G	G
7	63127974	rs31151352	A/T	I:Chrna7	Chrna7	T	A	A	A	T	A	A	A	A	A	A	A	A
7	63128189	rs32085618	A/C	I:Chrna7	Chrna7	C	A	A	A	C	A	A	A	A	A	A	A	A
7	63128314	rs31277620	A/G	I:Chrna7	Chrna7	A	G	G	G	A	G	G	G	G	G	G	G	G
7	63128506	rs32311639	A/G	I:Chrna7	Chrna7	G	A	A	A	G	A	A	A	A	A	A	A	A
7	63128561	rs32524917	A/G	I:Chrna7	Chrna7	G	A	A	A	G	A	A	A	A	A	A	A	A
7	63128619	rs249534819	A/G	I:Chrna7	Chrna7	G	A	A	A	G	A	A	A	A	A	A	A	A
7	63128794	rs31378714	C/T	I:Chrna7	Chrna7	C	T	T	T	C	T	T	T	T	T	T	T	T
7	63129146	rs46734487	C/T	I:Chrna7	Chrna7	T	C	C	C	T	C	C	C	C	C	C	C	C
7	63129164	rs48224345	C/T	I:Chrna7	Chrna7	T	C	C	C	T	C	C	C	C	C	C	C	C
7	63129318	rs32074519	C/T	I:Chrna7	Chrna7	C	T	T	T	C	T	T	T	T	T	T	T	T
7	63129372	rs32469631	C/T	I:Chrna7	Chrna7	T	C	C	C	T	C	C	C	C	C	C	C	C
7	63130047	rs253012866	indel	I:Chrna7	Chrna7		0	1							1			1
7	63130092		indel		Chrna7	1	0			1
7	63130123	rs32118028	C/T	I:Chrna7	Chrna7	T	C	C	C	T	C	C	C	C	C	C	C	C
7	63130263	rs31286896	C/T	I:Chrna7	Chrna7	C	T	T	T	C	T	T	T	T	T	T	T	T
7	63130358	rs31522025	C/G	I:Chrna7	Chrna7	C	G	G	G	C	G	G	G	G	G	G	G	G
7	63130918	rs31465632	C/T	I:Chrna7	Chrna7	T	C	C	C	T	C	C	C	C	C	C	C	C
7	63131021	rs226332985	indel	I:Chrna7	Chrna7	1	0			1
7	63131031	rs31768204	C/T	I:Chrna7	Chrna7	T	C	C	C	T	C	C	C	C	C	C	C	C
7	63131077	rs33060632	C/G	I:Chrna7	Chrna7	C	G	G	G	C	G	G	G	G	G	G	G	G
7	63132646	rs264709800	indel	I:Chrna7	Chrna7	1	0			1
7	63132712	rs219845210	A/T	I:Chrna7	Chrna7	T	A	A	A	T	A	A	A	A	A	A	A	A
7	63133256	rs31718092	C/T	I:Chrna7	Chrna7	T	C	C	C	T	C	C	C	C	C	C	C	C
7	63133763	rs33061824	A/G	I:Chrna7	Chrna7	G	A	A	A	G	A	A	A	A	A	A	A	A
7	63133788	rs33061825	A/C	I:Chrna7	Chrna7	C	A	A	A	C	A	A	A	A	A	A	A	A
7	63133812	rs47525355	C/T	I:Chrna7	Chrna7	C	T	T	T	C	T	T	T	T	T	T	T	T
7	63133818	rs33061826	C/T	I:Chrna7	Chrna7	C	T	T	T	C	T	T	T	T	T	T	T	T
7	63133909	rs33061827	C/T	I:Chrna7	Chrna7	T	C	C	C	T	C	C	C	C	C	C	C	C
7	63134086	rs254409073	indel	I:Chrna7	Chrna7	1	0			1
7	63134179	rs228883337	indel	I:Chrna7	Chrna7		0	1	1		1	1	1		1		1	1
7	63134267	rs250902847	indel	I:Chrna7	Chrna7	1	0	2	2	1	2	2	2		2		2	2
7	63134307	rs33061830	A/G	I:Chrna7	Chrna7	G	A	A	A	G	A	A	A	A	A	A	A	A
7	63134398	rs33061831	A/G	I:Chrna7	Chrna7	G	A	A	A	G	A	A	A	A	A	A	A	A
7	63134409	rs33061832	A/T	I:Chrna7	Chrna7	A	T	T	T	A	T	T	T	T	T	T	T	T
7	63134491	rs33062604	A/G	I:Chrna7	Chrna7	G	A	A	A	G	A	A	A	A	A	A	A	A
7	63134586	rs47085876	A/G/T	I:Chrna7	Chrna7	G	A	A	A	G	A	A	A	A	A	A	A	A
7	63134597	rs47109156	A/G	I:Chrna7	Chrna7	A	G	G	G	A	G	G	G	G	G	G	G	G
7	63134773	rs50446408	A/G	I:Chrna7	Chrna7	G	A	A	A	G	A	A	A	A	A	A	A	A
7	63134845	rs48196404	A/G	I:Chrna7	Chrna7	A	G	G	G	A	G	G	G	G	G	G	G	G
7	63134859	rs48539870	A/T	I:Chrna7	Chrna7	A	T	T	T	A	T	T	T	T	T	T	T	T
7	63134901	rs51929042	A/G	I:Chrna7	Chrna7	G	A	A	A	G	A	A	A	A	A	A	A	A
7	63134936	rs45805597	C/G	I:Chrna7	Chrna7	G	C	C	C	G	C	C	C	C	C	C	C	C
7	63134956	rs49002388	A/T	I:Chrna7	Chrna7	T	A	A	A	T	A	A	A	A	A	A	A	A
7	63135030	rs33062605	A/G	I:Chrna7	Chrna7	A	G	G	G	A	G	G	G	G	G	G	G	G
7	63135063	rs33062606	C/G	I:Chrna7	Chrna7	C	G	G	G	C	G	G	G	G	G	G	G	G
7	63135268	rs33062608	A/G	I:Chrna7	Chrna7	A	G	G	G	A	G	G	G	G	G	G	G	G
7	63135839	rs32205600	A/G	I:Chrna7	Chrna7	A	G	G	G	A	G	G	G	G	G	G	G	G
7	63135954	rs32340078	A/G	I:Chrna7	Chrna7	A	G	G	G	A	G	G	G	G	G	G	G	G
7	63136137	rs31813835	A/G	I:Chrna7	Chrna7	G	A	A	A	G	A	A	A	A	A	A	A	A
7	63136294	rs213499252	indel	I:Chrna7	Chrna7		0							1		1
7	63136302	rs217293555	indel	I:Chrna7	Chrna7		0	1	1		1	1	1		1		1	1
7	63136302	rs32359963	A/C	I:Chrna7	Chrna7	A	C	C	C	A	C	C	C	C	C	C	C	C
7	63136326		indel		Chrna7	1	0			1
7	63136340				Chrna7	A	G	G	G	G	G	G	G	G	G	G	G	G
7	63136370		indel		Chrna7		0						1
7	63136391	rs263961158	indel	I:Chrna7	Chrna7	1	0			1
7	63136636	rs32395732	A/C/T	I:Chrna7	Chrna7	C	T	T	T	C	T	T	T	T	T	T	T	T
7	63137078	rs248958253	indel	I:Chrna7	Chrna7	1	0			1
7	63137222		indel		Chrna7	1	0			1
7	63137229		indel		Chrna7		0										1
7	63137293	rs387037298	indel	I:Chrna7	Chrna7	1	0			1
7	63137432	rs52225082	C/T	I:Chrna7	Chrna7	T	C	C	C	T	C	C	C	C	C	C	C	C
7	63137487	rs47935336	C/T	I:Chrna7	Chrna7	T	C	C	C	T	C	C	C	C	C	C	C	C
7	63137675	rs226115428	C/T	I:Chrna7	Chrna7	C	T	T	T	C	T	T	T	T	T	T	T	T
7	63138155		indel		Chrna7		0		1
7	63138273	rs249303661	C/T	I:Chrna7	Chrna7	T	C	C	C	T	C	C	C	C	C	C	C	C
7	63138376	rs239909164	C/T	I:Chrna7	Chrna7	C	T	T	T	C	T	T	T	T	T	T	T	T
7	63138406	rs255311139	C/T	I:Chrna7	Chrna7	C	T	T	T	C	T	T	T	T	T	T	T	T
7	63138522	rs387880444	indel	I:Chrna7	Chrna7	1	0	2	2	1	2	2	2				2	2
7	63138723	rs214746519	indel	I:Chrna7	Chrna7	1	0			1
7	63138787	rs230227026	A/G	I:Chrna7	Chrna7	A	A	G	G	A	G	G	G	A	G	A	G	G
7	63138831	rs32077264	A/G	I:Chrna7	Chrna7	G	A	A	A	G	A	A	A	A	A	A	A	A
7	63138889	rs32166350	C/T	I:Chrna7	Chrna7	T	C	C	C	T	C	C	C	C	C	C	C	C
7	63138995	rs31641629	C/T	I:Chrna7	Chrna7	C	T	T	T	C	T	T	T	T	T	T	T	T
7	63139034	rs32057533	C/T	I:Chrna7	Chrna7	T	C	C	C	T	C	C	C	C	C	C	C	C
7	63139099	rs31493437	C/T	I:Chrna7	Chrna7	T	C	C	C	T	C	C	C	C	C	C	C	C
7	63139728	rs33902405	C/T	I:Chrna7	Chrna7	C	C	T	T	C	T	T	T	C	T	C	T	T
7	63140039	rs263495389	indel	I:Chrna7	Chrna7	1	0			1
7	63140047	rs32223908	A/T	I:Chrna7	Chrna7	A	T	T	T	A	T	T	T	T	T	T	T	T
7	63140294	rs31402753	A/T	I:Chrna7	Chrna7	T	A	A	A	T	A	A	A	A	A	A	A	A
7	63140583	rs32329418	C/T	I:Chrna7	Chrna7	C	T	T	T	C	T	T	T	T	T	T	T	T
7	63140737	rs31432988	C/T	I:Chrna7	Chrna7	C	T	T	T	C	T	T	T	T	T	T	T	T
7	63141294	rs32293528	A/G	I:Chrna7	Chrna7	G	A	A	A	G	A	A	A	A	A	A	A	A
7	63141357	rs31815449	A/G	I:Chrna7	Chrna7	G	A	A	A	G	A	A	A	A	A	A	A	A
7	63141378	rs31386447	A/G	I:Chrna7	Chrna7	G	A	A	A	G	A	A	A	A	A	A	A	A
7	63141636	rs238053047	indel	I:Chrna7	Chrna7	1	0			1
7	63142349	rs32253668	A/G	I:Chrna7	Chrna7	G	A	A	A	G	A	A	A	A	A	A	A	A
7	63142907	rs31186306	C/T	I:Chrna7	Chrna7	T	C	C	C	T	C	C	C	C	C	C	C	C
7	63142910	rs31925156	C/T	I:Chrna7	Chrna7	T	C	C	C	T	C	C	C	C	C	C	C	C
7	63142928	rs33902416	C/T	I:Chrna7	Chrna7	C	T	T	T	C	T	T	T	T	T	T	T	T
7	63143166	rs261709174	A/G	I:Chrna7	Chrna7	A	G	G	G	A	G	G	G	G	G	G	G	G
7	63143348	rs33902419	A/G	I:Chrna7	Chrna7	A	G	G	G	A	G	G	G	G	G	G	G	G
7	63143400	rs33902420	C/T	I:Chrna7	Chrna7	T	C	C	C	T	C	C	C	C	C	C	C	C
7	63143458	rs33902422	C/T	I:Chrna7	Chrna7	C	T	T	T	C	T	T	T	T	T	T	T	T
7	63143490	rs221309498	indel	I:Chrna7	Chrna7	1	0			1
7	63143548	rs33902423	C/T	I:Chrna7	Chrna7	C	T	T	T	C	T	T	T	T	T	T	T	T
7	63143613	rs33902424	C/T	I:Chrna7	Chrna7	T	C	C	C	T	C	C	C	C	C	C	C	C
7	63143850	rs33902428	A/G	I:Chrna7	Chrna7	G	A	A	A	G	A	A	A	A	A	A	A	A
7	63143903	rs33902429	C/T	I:Chrna7	Chrna7	T	C	C	C	T	C	C	C	C	C	C	C	C
7	63143924	rs33902430	A/G	I:Chrna7	Chrna7	A	G	G	G	A	G	G	G	G	G	G	G	G
7	63143960	rs33902431	C/T	I:Chrna7	Chrna7	T	C	C	C	T	C	C	C	C	C	C	C	C
7	63143983	rs50737768	A/G	I:Chrna7	Chrna7	A	G	G	G	A	G	G	G	G	G	G	G	G
7	63144071	rs48000911	A/G	I:Chrna7	Chrna7	A	G	G	G	A	G	G	G	G	G	G	G	G
7	63144073	rs33902432	A/G	I:Chrna7	Chrna7	G	A	G	G	G	G	G	G	A	G	A	G	G
7	63144107	rs33902433	A/G	I:Chrna7	Chrna7	G	A	A	A	G	A	A	A	A	A	A	A	A
7	63144111	rs47014383	C/T	I:Chrna7	Chrna7	T	C	C	C	T	C	C	C	C	C	C	C	C
7	63144138	rs33902434	A/T	I:Chrna7	Chrna7	A	T	T	T	A	T	T	T	T	T	T	T	T
7	63144183	rs33902435	C/T	I:Chrna7	Chrna7	T	C	C	C	T	C	C	C	C	C	C	C	C
7	63144275	rs33902436	C/T	I:Chrna7	Chrna7	C	T	T	T	C	T	T	T	T	T	T	T	T
7	63144303	rs33902437	A/C	I:Chrna7	Chrna7	C	A	A	A	C	A	A	A	A	A	A	A	A
7	63144374	rs33902438	C/T	I:Chrna7	Chrna7	T	C	C	C	T	C	C	C	C	C	C	C	C
7	63144446	rs33902439	A/G	I:Chrna7	Chrna7	A	G	G	G	A	G	G	G	G	G	G	G	G
7	63144460	rs33902440	A/G	I:Chrna7	Chrna7	A	G	G	G	A	G	G	G	G	G	G	G	G
7	63144501	rs33902441	A/T	I:Chrna7	Chrna7	T	A	A	A	T	A	A	A	A	A	A	A	A
7	63144671	rs49984481	A/G	I:Chrna7	Chrna7	A	G	G	G	A	G	G	G	G	G	G	G	G
7	63144678	rs46728269	C/T	I:Chrna7	Chrna7	C	T	T	T	C	T	T	T	T	T	T	T	T
7	63144734	rs33902442	A/G	I:Chrna7	Chrna7	G	A	A	A	G	A	A	A	A	A	A	A	A
7	63144885	rs33902444	G/T	I:Chrna7	Chrna7	T	G	G	G	T	G	G	G	G	G	G	G	G
7	63145002	rs33902445	C/T	I:Chrna7	Chrna7	T	C	C	C	T	C	C	C	C	C	C	C	C
7	63145229	rs32152578	A/G	I:Chrna7	Chrna7	G	A	A	A	G	A	A	A	A	A	A	A	A
7	63145355	rs256916594	indel	I:Chrna7	Chrna7	1	0			1
7	63145384	rs387762348	indel	I:Chrna7	Chrna7	1	0			1
7	63145626	rs33902446	A/G	I:Chrna7	Chrna7	A	G	G	G	A	G	G	G	G	G	G	G	G
7	63145878	rs50256570	C/T	I:Chrna7	Chrna7	C	T	T	T	C	T	T	T	T	T	T	T	T
7	63146000	rs254246593	indel	I:Chrna7	Chrna7	1	0			1
7	63146071	rs33902448	C/T	I:Chrna7	Chrna7	C	T	T	T	C	T	T	T	T	T	T	T	T
7	63146094	rs33902449	A/C	I:Chrna7	Chrna7	C	A	A	A	C	A	A	A	A	A	A	A	A
7	63146172	rs47398402	C/T	I:Chrna7	Chrna7	C	T	C	C	C	C	C	C	T	C	T	C	C
7	63146266	rs33902450	G/T	I:Chrna7	Chrna7	T	G	G	G	T	G	G	G	G	G	G	G	G
7	63146343	rs33902452	A/G	I:Chrna7	Chrna7	A	G	G	G	A	G	G	G	G	G	G	G	G
7	63146392	rs51065859	G/T	I:Chrna7	Chrna7	G	T	T	T	G	T	T	T	T	T	T	T	T
7	63146412	rs48315426	A/C	I:Chrna7	Chrna7	C	A	A	A	C	A	A	A	A	A	A	A	A
7	63146420	rs33902453	G/T	I:Chrna7	Chrna7	G	T	T	T	G	T	T	T	T	T	T	T	T
7	63146434	rs33902454	A/G	I:Chrna7	Chrna7	A	G	G	G	A	G	G	G	G	G	G	G	G
7	63146481	rs33902455	A/C/T	I:Chrna7	Chrna7	A	C	C	C	A	C	C	C	C	C	C	C	C
7	63146495	rs261811959	indel	I:Chrna7	Chrna7	1	0			1
7	63146499	rs586076939	A/G	I:Chrna7	Chrna7	G	A	A	A	G	A	A	A	A	A	A	A	A
7	63146553	rs33902456	A/G	I:Chrna7	Chrna7	G	A	A	A	G	A	A	A	A	A	A	A	A
7	63146573	rs50809444	A/G	I:Chrna7	Chrna7	G	A	A	A	G	A	A	A	A	A	A	A	A
7	63146609	rs33902457	A/G	I:Chrna7	Chrna7	A	G	G	G	A	G	G	G	G	G	G	G	G
7	63146622	rs33902458	C/T	I:Chrna7	Chrna7	C	T	T	T	C	T	T	T	T	T	T	T	T
7	63146770	rs33902459	C/T	I:Chrna7	Chrna7	T	C	C	C	T	C	C	C	C	C	C	C	C
7	63146804	rs33902460	A/G	I:Chrna7	Chrna7	G	A	A	A	G	A	A	A	A	A	A	A	A
7	63147174	rs244230682	indel	I:Chrna7	Chrna7	1	0	2	2	1	2	2	2		2			2
7	63147190		indel		Chrna7	0	0			1
7	63147192	rs52300732	A/G	I:Chrna7	Chrna7	A	G			A	G		G	G		G	G	G
7	63147194	rs579986471	A/G	I:Chrna7	Chrna7	A	G			A			G	G		G	G
7	63147198	rs582774375	A/G	I:Chrna7	Chrna7	A	G			A				G		G
7	63147210	rs586659028	A/G	I:Chrna7	Chrna7	G	G			G				G		G	A
7	63147214	rs52231700	A/G	I:Chrna7	Chrna7	G	A	A	A	G	A	A	A	A	A	A	A	A
7	63147230	rs52430237	A/G	I:Chrna7	Chrna7	A	G	G	G	A	G	G	G	G	G	G	G	G
7	63147647	rs33902461	C/T	I:Chrna7	Chrna7	T	C	C	C	T	C	C	C	C	C	C	C	C
7	63147687	rs33902462	A/T	I:Chrna7	Chrna7	T	A	A	A	T	A	A	A	A	A	A	A	A
7	63147758	rs33902464	C/T	I:Chrna7	Chrna7	T	C	C	C	T	C	C	C	C	C	C	C	C
7	63147803	rs45963419	A/C	I:Chrna7	Chrna7	C	A	A	A	C	A	A	A	A	A	A	A	A
7	63147807	rs49003289	C/G	I:Chrna7	Chrna7	C	G	G	G	C	G	G	G	G	G	G	G	G
7	63147821	rs49868362	C/G	I:Chrna7	Chrna7	G	C	C	C	G	C	C	C	C	C	C	C	C
7	63147867	rs33902465	C/T	I:Chrna7	Chrna7	T	C	C	C	T	C	C	C	C	C	C	C	C
7	63147882	rs45989696	C/T	I:Chrna7	Chrna7	T	C	C	C	T	C	C	C	C	C	C	C	C
7	63147913	rs33902466	C/T	I:Chrna7	Chrna7	C	C	T	T	C	T	T	T	C	T	C	T	T
7	63147928	rs253502594	indel	I:Chrna7	Chrna7	1	0			1
7	63147939	rs48424194	A/G	I:Chrna7	Chrna7	G	A	A	A	G	A	A	A	A	A	A	A	A
7	63147956	rs33902467	C/T	I:Chrna7	Chrna7	T	C	C	C	T	C	C	C	C	C	C	C	C
7	63148036	rs240562651	indel	I:Chrna7	Chrna7	1	0			1
7	63148081	rs33902469	C/T	I:Chrna7	Chrna7	C	T	T	T	C	T	T	T	T	T	T	T	T
7	63148091	rs33902470	C/T	I:Chrna7	Chrna7	C	T	T	T	C	T	T	T	T	T	T	T	T
7	63148113	rs33902471	C/T	I:Chrna7	Chrna7	C	T	T	T	C	T	T	T	T	T	T	T	T
7	63148208	rs33902472	C/T	I:Chrna7	Chrna7	T	C	C	C	T	C	C	C	C	C	C	C	C
7	63148241	rs33902473	C/G	I:Chrna7	Chrna7	G	C	C	C	G	C	C	C	C	C	C	C	C
7	63148286	rs226765370	indel	I:Chrna7	Chrna7	1	0			1
7	63148296	rs48346605	C/T	I:Chrna7	Chrna7	T	C	C	C	T	C	C	C	C	C	C	C	C
7	63148372	rs33902475	C/T	I:Chrna7	Chrna7	C	T	T	T	C	T	T	T	T	T	T	T	T
7	63148569	rs33902477	C/T	I:Chrna7	Chrna7	T	C	C	C	T	C	C	C	C	C	C	C	C
7	63148853	rs33902478	A/G/T	I:Chrna7	Chrna7	A	G	G	G	A	G	G	G	G	G	G	G	G
7	63148999	rs51427173	C/T	I:Chrna7	Chrna7	C	T	T	T	C	T	T	T	T	T	T	T	T
7	63149055	rs231243509	indel	I:Chrna7	Chrna7		0	1	1		1	1	1		1		1	1
7	63149056	rs33902479	A/G	I:Chrna7	Chrna7	G	A	A		G	A	A	A	A	A	A	A	A
7	63149153	rs33902480	A/G	I:Chrna7	Chrna7	A	G	G	G	A	G	G	G	G	G	G	G	G
7	63149297	rs212322837	A/G	I:Chrna7	Chrna7	G	G	G	G	G	G	A	G	G	G	G	G	G
7	63149300	rs33902481	C/T	I:Chrna7	Chrna7	C	T	T	T	C	T	T	T	T	T	T	T	T
7	63149329	rs33902482	A/G	I:Chrna7	Chrna7	A	G	G	G	A	G	G	G	G	G	G	G	G
7	63149401	rs33902483	A/G	I:Chrna7	Chrna7	A	G	G	G	A	G	G	G	G	G	G	G	G
7	63149425	rs33902484	A/G	I:Chrna7	Chrna7	G	A	A	A	G	A	A	A	A	A	A	A	A
7	63149508	rs33902485	C/T	I:Chrna7	Chrna7	C	T	T	T	C	T	T	T	T	T	T	T	T
7	63149529	rs33902486	A/C	I:Chrna7	Chrna7	A	C	C	C	A	C	C	C	C	C	C	C	C
7	63149575	rs252260855	indel	I:Chrna7	Chrna7	1	0
7	63149577		indel		Chrna7		0			2
7	63149578	rs248932572	indel	I:Chrna7	Chrna7		0	1	1		1	1	1		1		1	1
7	63149755	rs33902487	A/G	I:Chrna7	Chrna7	A	G	G	G	A	G	G	G	G	G	G	G	G
7	63149825	rs33902488	C/T	I:Chrna7	Chrna7	C	T	T	T	C	T	T	T	T	T	T	T	T
7	63149951	rs215937278	indel	I:Chrna7	Chrna7	1	0			1
7	63150024	rs33902490	C/T	I:Chrna7	Chrna7	T	C	C	C	T	C	C	C	C	C	C	C	C
7	63150045	rs33902491	C/G	I:Chrna7	Chrna7	G	C	C	C	G	C	C	C	C	C	C	C	C
7	63150129	rs33902492	A/G	I:Chrna7	Chrna7	A	G	G	G	A	G	G	G	G	G	G	G	G
7	63150211	rs49807742	A/G	I:Chrna7	Chrna7	G	A	A	A	G	A	A	A	A	A	A	A	A
7	63150228	rs51801412	A/G	I:Chrna7	Chrna7	G	A	A	A	G	A	A	A	A	A	A	A	A
7	63150276	rs33902493	C/G	I:Chrna7	Chrna7	G	C	C	C	G	C	C	C	C	C	C	C	C
7	63150308	rs46075980	A/G	I:Chrna7	Chrna7	G	A	A	A	G	A	A	A	A	A	A	A	A
7	63150330	rs46095151	C/T	I:Chrna7	Chrna7	T	C	C	C	T	C	C	C	C	C	C	C	C
7	63150731	rs33902497	C/T	I:Chrna7	Chrna7	C	T	T	T	C	T	T	T	T	T	T	T	T
7	63150767	rs33902499	A/C	I:Chrna7	Chrna7	A	C	C	C	A	C	C	C	C	C	C	C	C
7	63150785	rs47342546	A/G	I:Chrna7	Chrna7	G	A	A	A	G	A	A	A	A	A	A	A	A
7	63150999	rs33902500	G/T	I:Chrna7	Chrna7	G	T	T	T	G	T	T	T	T	T	T	T	T
7	63151038	rs33902501	A/G/T	I:Chrna7	Chrna7	A	T	T	T	A	T	T	T	T	T	T	T	T
7	63151116	rs33902502	C/T	I:Chrna7	Chrna7	T	C	C	C	T	C	C	C	C	C	C	C	C
7	63151180	rs33902503	C/G	I:Chrna7	Chrna7	C	G	G	G	C	G	G	G	G	G	G	G	G
7	63151201	rs33902504	A/G/T	I:Chrna7	Chrna7	T	A	A	A	T	A	A	A	A	A	A	A	A
7	63151290	rs49002307	A/G	I:Chrna7	Chrna7	G	A	A	A	G	A	A	A	A	A	A	A	A
7	63151295	rs46644102	A/G	I:Chrna7	Chrna7	G	A	A	A	G	A	A	A	A	A	A	A	A
7	63151303	rs46220384	A/G	I:Chrna7	Chrna7	A	G	G	G	A	G	G	G	G	G	G	G	G
7	63151339	rs240977372	indel	I:Chrna7	Chrna7	1	0			1
7	63151426	rs46745512	A/G	I:Chrna7	Chrna7	G	A	A	A	G	A	A	A	A	A	A	A	A
7	63151626	rs45683851	G/T	I:Chrna7	Chrna7	T	G	G	G	T	G	G	G	G	G	G	G	G
7	63151659	rs47919483	A/G	I:Chrna7	Chrna7	A	G	G	G	A	G	G	G	G	G	G	G	G
7	63151761	rs46561234	A/G	I:Chrna7	Chrna7	A	G	G	G	A	G	G	G	G	G	G	G	G
7	63151876	rs48353437	A/G	I:Chrna7	Chrna7	A	G	G	G	A	G	G	G	G	G	G	G	G
7	63151926	rs31815869	G/T	I:Chrna7	Chrna7	T	G	G	G	T	G	G	G	G	G	G	G	G
7	63152000	rs32315828	C/T	I:Chrna7	Chrna7	C	T	T	T	C	T	T	T	T	T	T	T	T
7	63152120	rs31298822	A/G	I:Chrna7	Chrna7	A	G	G	G	A	G	G	G	G	G	G	G	G
7	63152210	rs31492807	A/G	I:Chrna7	Chrna7	G	A	A	A	G	A	A	A	A	A	A	A	A
7	63152238	rs32227188	A/G	I:Chrna7	Chrna7	G	A	A	A	G	A	A	A	A	A	A	A	A
7	63152244	rs31141010	A/G	I:Chrna7	Chrna7	G	A	A	A	G	A	A	A	A	A	A	A	A
7	63152325	rs213348582	C/T	I:Chrna7	Chrna7	T	C	C	C	T	C	C	C	C	C	C	C	C
7	63152355	rs238749607	C/T	I:Chrna7	Chrna7	C	T	T	T	C	T	T	T	T	T	T	T	T
7	63152358	rs242558059	A/C/T	I:Chrna7	Chrna7	A	C	C	C	A	C	C	C	C	C	C	C	C
7	63152388	rs582047745	A/C	I:Chrna7	Chrna7	A	C	C	C	A	C	C	C	C	C	C	C	C
7	63152400	rs46764831	C/T	I:Chrna7	Chrna7	T	C	C	C	T	C	C	C	C	C	C	C	C
7	63152402	rs253069147	C/T	I:Chrna7	Chrna7	T	C	C	C	T	C	C	C	C	C	C	C	C
7	63152488	rs31340267	A/G	I:Chrna7	Chrna7	G	A	A	A	G	A	A	A	A	A	A	A	A
7	63152531	rs31579091	C/T	I:Chrna7	Chrna7	T	C	C	C	T	C	C	C	C	C	C	C	C
7	63152690	rs31465713	C/T	I:Chrna7	Chrna7	C	T	T	T	C	T	T	T	T	T	T	T	T
7	63152746	rs31492834	G/T	I:Chrna7	Chrna7	T	G	G	G	T	G	G	G	G	G	G	G	G
7	63152833	rs33902506	C/T	I:Chrna7	Chrna7	C	T	T	T	C	T	T	T	T	T	T	T	T
7	63152880	rs33864061	C/T	I:Chrna7	Chrna7	T	C	C	C	T	C	C	C	C	C	C	C	C
7	63152881	rs31875105	A/G	I:Chrna7	Chrna7	G	A	A	A	G	A	A	A	A	A	A	A	A
7	63152963	rs33902508	C/T	I:Chrna7	Chrna7	C	T	T	T	C	T	T	T	T	T	T	T	T
7	63152976	rs46637247	C/T	I:Chrna7	Chrna7	T	C	C	C	T	C	C	C	C	C	C	C	C
7	63152984	rs46992137	A/G	I:Chrna7	Chrna7	G	A	A	A	G	A	A	A	A	A	A	A	A
7	63152991	rs46387906	A/T	I:Chrna7	Chrna7	A	T	T	T	A	T	T	T	T	T	T	T	T
7	63153034	rs33902511	A/G	I:Chrna7	Chrna7	A	G	G	G	A	G	G	G	G	G	G	G	G
7	63153100	rs33902512	A/C	I:Chrna7	Chrna7	A	C	C	C	A	C	C	C	C	C	C	C	C
7	63153113	rs47573601	C/T	I:Chrna7	Chrna7	T	C	C	C	T	C	C	C	C	C	C	C	C
7	63153128	rs51488184	C/T	I:Chrna7	Chrna7	C	T	T	T	C	T	T	T	T	T	T	T	T
7	63153154	rs47296501	A/T	I:Chrna7	Chrna7	T	A	A	A	T	A	A	A	A	A	A	A	A
7	63153160	rs51092353	C/T	I:Chrna7	Chrna7	T	C	C	C	T	C	C	C	C	C	C	C	C
7	63153202	rs46778790	A/G	I:Chrna7	Chrna7	G	A	A	A	G	A	A	A	A	A	A	A	A
7	63153270	rs33902513	A/T	I:Chrna7	Chrna7	T	A	A	A	T	A	A	A	A	A	A	A	A
7	63153284	rs257029982	indel	I:Chrna7	Chrna7	1	0			1
7	63153319	rs33902514	A/G	I:Chrna7	Chrna7	G	A	A	A	G	A	A	A	A	A	A	A	A
7	63153509	rs33902515	A/T	I:Chrna7	Chrna7	A	T	T	T	A	T	T	T	T	T	T	T	T
7	63153675	rs33902516	A/G	I:Chrna7	Chrna7	A	G	G	G	A	G	G	G	G	G	G	G	G
7	63153842	rs51421440	A/C	I:Chrna7	Chrna7	C	A	A	A	C	A	A	A	A	A	A	A	A
7	63153918	rs33902517	A/G	I:Chrna7	Chrna7	G	A	A	A	G	A	A	A	A	A	A	A	A
7	63154108	rs33902518	A/G	I:Chrna7	Chrna7	A	G	G	G	A	G	G	G	G	G	G	G	G
7	63154119	rs33902519	C/T	I:Chrna7	Chrna7	T	C	C	C	T	C	C	C	C	C	C	C	C
7	63154135	rs33902520	A/G	I:Chrna7	Chrna7	A	G	G	G	A	G	G	G	G	G	G	G	G
7	63154321	rs33902521	A/G	I:Chrna7	Chrna7	A	G	G	G	A	G	G	G	G	G	G	G	G
7	63154360	rs33902522	C/T	I:Chrna7	Chrna7	T	C	C	C	T	C	C	C	C	C	C	C	C
7	63154445	rs33902523	A/G	I:Chrna7	Chrna7	A	G	G	G	A	G	G	G	G	G	G	G	G
7	63154528	rs45978139	G/T	I:Chrna7	Chrna7	T	G	G	G	T	G	G	G	G	G	G	G	G
7	63154628	rs50662332	C/G	I:Chrna7	Chrna7	G	C	C	C	G	C	C	C	C	C	C	C	C
7	63154640	rs258857288	indel	I:Chrna7	Chrna7	1	0			1
7	63154871	rs51245080	A/G	I:Chrna7	Chrna7	G	A	A	A	G	A	A	A	A	A	A	A	A
7	63155143	rs33902524	C/T	I:Chrna7	Chrna7	T	C	C	C	T	C	C	C	C	C	C	C	C
7	63155193	rs33902525	C/T	I:Chrna7	Chrna7	C	T	T	T	C	T	T	T	T	T	T	T	T
7	63155233	rs33902526	A/T	I:Chrna7	Chrna7	T	A	A	A	T	A	A	A	A	A	A	A	A
7	63155392	rs48107105	C/T	I:Chrna7	Chrna7	C	T	T	T	C	T	T	T	T	T	T	T	T
7	63155398	rs33902528	C/T	I:Chrna7	Chrna7	C	T	T	T	C	T	T	T	T	T	T	T	T
7	63155431	rs33902529	A/T	I:Chrna7	Chrna7	A	T	T	T	A	T	T	T	T	T	T	T	T
7	63155482	rs45808252	A/G	I:Chrna7	Chrna7	G	A	A	A	G	A	A	A	A	A	A	A	A
7	63155523	rs46379819	C/G	I:Chrna7	Chrna7	G	C	C	C	G	C	C	C	C	C	C	C	C
7	63155568	rs33902530	C/T	I:Chrna7	Chrna7	T	C	C	C	T	C	C	C	C	C	C	C	C
7	63155591		indel		Chrna7	1	0			1
7	63155642	rs33902531	C/T	I:Chrna7	Chrna7	T	C	C	C	T	C	C	C	C	C	C	C	C
7	63155691	rs33902532	A/T	I:Chrna7	Chrna7	T	A	A	A	T	A	A	A	A	A	A	A	A
7	63155710	rs235736583	indel	I:Chrna7	Chrna7	1	0			1
7	63155766	rs46927066	C/T	I:Chrna7	Chrna7	T	C	C	C	T	C	C	C	C	C	C	C	C
7	63155767	rs231529605	A/G	I:Chrna7	Chrna7	G	A	A	A	G	A	A	A	A	A	A	A	A
7	63155789	rs46585571	G/T	I:Chrna7	Chrna7	T	G	G	G	T	G	G	G	G	G	G	G	G
7	63155853	rs213148244	indel	I:Chrna7	Chrna7	1	0			1
7	63155888	rs46762994	A/C	I:Chrna7	Chrna7	A	C	C	C	A	C	C	C	C	C	C	C	C
7	63155908	rs51416847	C/T	I:Chrna7	Chrna7	C	T	T	T	C	T	T	T	T	T	T	T	T
7	63155924	rs51312646	A/G	I:Chrna7	Chrna7	A	G	G	G	A	G	G	G	G	G	G	G	G
7	63155982	rs33902535	A/G	I:Chrna7	Chrna7	G	A	A	A	G	A	A	A	A	A	A	A	A
7	63156080	rs33902536	A/T	I:Chrna7	Chrna7	A	T	T	T	A	T	T	T	T	T	T	T	T
7	63156106	rs260506683	indel	I:Chrna7	Chrna7	2	0			2
7	63156109	rs33902537	A/T	I:Chrna7	Chrna7	T	A	A	A	T	A	A	A	A	A	A	A	A
7	63156196	rs33902539	A/G/T	I:Chrna7	Chrna7	A	G	G	G	A	G	G	G	G	G	G	G	G
7	63156227	rs33902540	A/T	I:Chrna7	Chrna7	A	T	T	T	A	T	T	T	T	T	T	T	T
7	63156258	rs47879158	A/T	I:Chrna7	Chrna7	A	T	T	T	A	T	T	T	T	T	T	T	T
7	63156261	rs33902541	C/G	I:Chrna7	Chrna7	G	C	C	C	G	C	C	C	C	C	C	C	C
7	63156269	rs238721733	indel	I:Chrna7	Chrna7	1	0			1
7	63156401	rs49699342	A/G	I:Chrna7	Chrna7	A	G	G	G	A	G	G	G	G	G	G	G	G
7	63156450	rs49125616	A/G	I:Chrna7	Chrna7	G	A	A	A	G	A	A	A	A	A	A	A	A
7	63156557	rs48380201	A/G	I:Chrna7	Chrna7	A	G	G	G	A	G	G	G	G	G	G	G	G
7	63156708	rs48106269	C/T	I:Chrna7	Chrna7	T	C	C	C	T	C	C	C	C	C	C	C	C
7	63156714	rs50764013	C/T	I:Chrna7	Chrna7	C	T	T	T	C	T	T	T	T	T	T	T	T
7	63156780	rs45737011	A/G	I:Chrna7	Chrna7	A	G	G	G	A	G	G	G	G	G	G	G	G
7	63156872	rs45673746	A/T	I:Chrna7	Chrna7	T	A	A	A	T	A	A	A	A	A	A	A	A
7	63156914	rs47227247	A/G	I:Chrna7	Chrna7	A	G	G	G	A	G	G	G	G	G	G	G	G
7	63156968	rs247567586	A/C	I:Chrna7	Chrna7	C	C	C	C	A	C	C	C	C	C	C	C	C
7	63156995	rs49854305	A/G	I:Chrna7	Chrna7	A	G	G	G	A	G	G	G	G	G	G	G	G
7	63157032	rs51768462	A/C	I:Chrna7	Chrna7	C	A	A	A	C	A	A	A	A	A	A	A	A
7	63157043	rs46580158	C/T	I:Chrna7	Chrna7	C	T	T	T	C	T	T	T	T	T	T	T	T
7	63157059	rs48479227	A/G	I:Chrna7	Chrna7	G	A	A	A	G	A	A	A	A	A	A	A	A
7	63157060	rs47949092	A/T	I:Chrna7	Chrna7	A	T	T	T	A	T	T	T	T	T	T	T	T
7	63157228	rs244637867	C/T	I:Chrna7	Chrna7	C	T	T	T	C	T	T	T	T	T	T	T	T
7	63157372	rs266178086	A/G	I:Chrna7	Chrna7	G	A	A	A	G	A	A	A	A	A	A	A	A
7	63157418	rs258510304	G/T	I:Chrna7	Chrna7	G	T	T	T	G	T	T	T	T	T	T	T	T
7	63158084	rs33902552	A/C	I:Chrna7	Chrna7	A	C	C	C	A	C	C	C	C	C	C	C	C
7	63158118	rs33902553	A/G	I:Chrna7	Chrna7	A	G	G	G	A	G	G	G	G	G	G	G	G
7	63158154	rs33902554	A/T	I:Chrna7	Chrna7	T	A	A	A	T	A	A	A	A	A	A	A	A
7	63158208	rs33902556	G/T	I:Chrna7	Chrna7	G	T	G	G	G	G	G	G	T	G	T	G	G
7	63158248	rs226625435	indel	I:Chrna7	Chrna7	1	0			1
7	63158292	rs33902557	A/C	I:Chrna7	Chrna7	A	C	C	C	A	C	C	C	C	C	C	C	C
7	63158346	rs33902558	C/T	I:Chrna7	Chrna7	C	T	T	T	C	T	T	T	T	T	T	T	T
7	63158387	rs33902559	C/T	I:Chrna7	Chrna7	C	T	T	T	C	T	T	T	T	T	T	T	T
7	63158521	rs52192326	A/G	I:Chrna7	Chrna7	G	A	A	A	G	A	A	A	A	A	A	A	A
7	63158685	rs33902560	A/G	I:Chrna7	Chrna7	A	G	G	G	A	G	G	G	G	G	G	G	G
7	63158747	rs33902561	C/T	I:Chrna7	Chrna7	T	C	C	C	T	C	C	C	C	C	C	C	C
7	63158766	rs33902562	A/T	I:Chrna7	Chrna7	A	T	T	T	A	T	T	T	T	T	T	T	T
7	63158801	rs33902563	G/T	I:Chrna7	Chrna7	G	T	T	T	G	T	T	T	T	T	T	T	T
7	63158805	rs213382964	A/T	I:Chrna7	Chrna7	A	T	T	T	A	T	T	T	T	T	T	T	T
7	63158806	rs231911544	C/T	I:Chrna7	Chrna7	T	C	C	C	T	C	C	C	C	C	C	C	C
7	63158816	rs242147731	A/G	I:Chrna7	Chrna7	G	A	A	A	G	A	A	A	A	A	A	A	A
7	63158922	rs212757756	A/T	I:Chrna7	Chrna7	T	A	A	A	T	A	A	A	A	A	A	A	A
7	63158924	rs241933400	C/T	I:Chrna7	Chrna7	C	T	T	T	C	T	T	T	T	T	T	T	T
7	63158927	rs260845067	C/T	I:Chrna7	Chrna7	T	C	C	C	T	C	C	C	C	C	C	C	C
7	63158942	rs224187620	A/G	I:Chrna7	Chrna7	G	A	A	A	G	A	A	A	A	A	A	A	A
7	63158950	rs48422098	C/T	I:Chrna7	Chrna7	C	T	T	T	C	T	T	T	T	T	T	T	T
7	63159203	rs33902565	A/C	I:Chrna7	Chrna7	A	C	C	C	A	C	C	C	C	C	C	C	C
7	63159232	rs33902566	A/G	I:Chrna7	Chrna7	A	G	G	G	A	G	G	G	G	G	G	G	G
7	63159315	rs33902568	C/G	I:Chrna7	Chrna7	G	C	C	C	G	C	C	C	C	C	C	C	C
7	63159343	rs33902569	C/G	I:Chrna7	Chrna7	G	C	C	C	G	C	C	C	C	C	C	C	C
7	63159386	rs33902570	A/G	I:Chrna7	Chrna7	A	G	G	G	A	G	G	G	G	G	G	G	G
7	63159520	rs33902574	A/G	I:Chrna7	Chrna7	G	A	A	A	G	A	A	A	A	A	A	A	A
7	63159524	rs46863885	G/T	I:Chrna7	Chrna7	T	G	G	G	T	G	G	G	G	G	G	G	G
7	63159543	rs49537684	A/T	Cs:Chrna7:L:78	Chrna7	A	T	T	T	A	T	T	T	T	T	T	T	T
7	63159598	rs33902575	A/G	I:Chrna7	Chrna7	A	G	G	G	A	G	G	G	G	G	G	G	G
7	63159628	rs33902577	C/T	I:Chrna7	Chrna7	C	T	T	T	C	T	T	T	T	T	T	T	T
7	63159639	rs47052876	A/G	I:Chrna7	Chrna7	G	A	A	A	G	A	A	A	A	A	A	A	A
7	63159644	rs50368459	C/T	I:Chrna7	Chrna7	T	C	C	C	T	C	C	C	C	C	C	C	C
7	63159663	rs33902578	C/T	I:Chrna7	Chrna7	C	T	T	T	C	T	T	T	T	T	T	T	T
7	63159687	rs248933993	indel	I:Chrna7	Chrna7	1	0			1
7	63159862	rs33902579	G/T	I:Chrna7	Chrna7	T	G	G	G	T	G	G	G	G	G	G	G	G
7	63159901	rs238292235	indel	I:Chrna7	Chrna7	1	0			1
7	63159903	rs250314033	indel	I:Chrna7	Chrna7		0	1	1		1	1	1		1		1	1
7	63159911		indel		Chrna7	1	0			1
7	63159939	rs33902580	A/G	I:Chrna7	Chrna7	G	A	A	A	G	A	A	A	A	A	A	A	A
7	63159962	rs33902581	C/T	I:Chrna7	Chrna7	T	C	C	C	T	C	C	C	C	C	C	C	C
7	63160029	rs33902583	A/G	I:Chrna7	Chrna7	G	A	A	A	G	A	A	A	A	A	A	A	A
7	63160093	rs33902584	A/G	I:Chrna7	Chrna7	A	G	G	G	A	G	G	G	G	G	G	G	G
7	63160134	rs33902586	A/T	I:Chrna7	Chrna7	T	A	A	A	T	A	A	A	A	A	A	A	A
7	63160188	rs33902587	A/G	I:Chrna7	Chrna7	A	G	G	G	A	G	G	G	G	G	G	G	G
7	63160199	rs33902588	A/C	I:Chrna7	Chrna7	C	A	A	A	C	A	A	A	A	A	A	A	A
7	63160230	rs33902589	A/G	I:Chrna7	Chrna7	G	A	A	A	G	A	A	A	A	A	A	A	A
7	63160240	rs33902590	A/G	I:Chrna7	Chrna7	G	A	A	A	G	A	A	A	A	A	A	A	A
7	63160264	rs33902591	A/G	I:Chrna7	Chrna7	A	G	G	G	A	G	G	G	G	G	G	G	G
7	63160268	rs33902592	C/T	I:Chrna7	Chrna7	C	T	T	T	C	T	T	T	T	T	T	T	T
7	63160298	rs33902593	C/T	I:Chrna7	Chrna7	C	T	T	T	C	T	T	T	T	T	T	T	T
7	63160306	rs33902594	A/G	I:Chrna7	Chrna7	A	G	G	G	A	G	G	G	G	G	G	G	G
7	63160373	rs33902595	A/G	I:Chrna7	Chrna7	G	A	A	A	G	A	A	A	A	A	A	A	A
7	63160421	rs47737845	A/G	I:Chrna7	Chrna7	G	A	A	A	G	A	A	A	A	A	A	A	A
7	63160428	rs46943274	A/G	I:Chrna7	Chrna7	G	A	A	A	G	A	A	A	A	A	A	A	A
7	63160534	rs52454937	A/T	I:Chrna7	Chrna7	T	A	A	A	T	A	A	A	A	A	A	A	A
7	63160548	rs52527282	C/T	I:Chrna7	Chrna7	C	T	T	T	C	T	T	T	T	T	T	T	T
7	63160576	rs579534581	A/C	I:Chrna7	Chrna7	A	C	C	C	A	C	C	C	C	C	C	C	C
7	63160580	rs214995714	indel	I:Chrna7	Chrna7	1	0			1
7	63160630	rs33902596	C/T	I:Chrna7	Chrna7	T	C	C	C	T	C	C	C	C	C	C	C	C
7	63160669	rs51280031	A/G	I:Chrna7	Chrna7	G	A	A	A	G	A	A	A	A	A	A	A	A
7	63160671	rs33902599	A/G	I:Chrna7	Chrna7	A	G	G	G	A	G	G	G	G	G	G	G	G
7	63160698	rs33902600	A/G	I:Chrna7	Chrna7	G	A	A	A	G	A	A	A	A	A	A	A	A
7	63160721	rs46121316	A/C	I:Chrna7	Chrna7	C	A	A	A	C	A	A	A	A	A	A	A	A
7	63160723	rs219076589	indel	I:Chrna7	Chrna7	1	0			1
7	63160778	rs231566814	A/G	I:Chrna7	Chrna7	A	G	G	G	A	G	G	G	G	G	G	G	G
7	63160779	rs244747311	C/T	I:Chrna7	Chrna7	C	T	T	T	C	T	T	T	T	T	T	T	T
7	63160827	rs33902601	C/T	I:Chrna7	Chrna7	T	C	C	C	T	C	C	C	C	C	C	C	C
7	63160903	rs33902603	C/G	I:Chrna7	Chrna7	G	C	C	C	G	C	C	C	C	C	C	C	C
7	63160928	rs107849826	C/T	I:Chrna7	Chrna7	T	C	C	C	T	C	C	C	C	C	C	C	C
7	63161422	rs240487963	C/T	I:Chrna7	Chrna7	T	C	C	C	T	C	C	C	C	C	C	C	C
7	63161480	rs258304066	C/G	I:Chrna7	Chrna7	C	G	G	G	C	G	G	G	G	G	G	G	G
7	63161486	rs221531686	C/T	I:Chrna7	Chrna7	T	C	C	C	T	C	C	C	C	C	C	C	C
7	63161546	rs238620068	G/T	I:Chrna7	Chrna7	T	T	T	G	T	T	T	T	T	T	T	T	T
7	63161577	rs33902604	C/T	I:Chrna7	Chrna7	C	T	T	T	C	T	T	T	T	T	T	T	T
7	63161578	rs218000356	A/G	I:Chrna7	Chrna7	G	A	A	A	G	A	A	A	A	A	A	A	A
7	63161586	rs242071763	A/C	I:Chrna7	Chrna7	A	C	C	C	A	C	C	C	C	C	C	C	C
7	63161613	rs253369582	indel	I:Chrna7	Chrna7	1	0			1
7	63161732	rs33902605	A/C/G	I:Chrna7	Chrna7	G	G	A		G	A			G		G	A
7	63161835	rs32015238	A/G	I:Chrna7	Chrna7	G	A	A	A	G	A	A	A	A	A	A	A	A
7	63161886	rs31090872	A/C	I:Chrna7	Chrna7	C	A	A	A	C	A	A	A	A	A	A	A	A
7	63161953	rs32471397	A/C/T	I:Chrna7	Chrna7	C	T	T	T	C	T	T	T	T	T	T	T	T
7	63161958	rs31649227	C/T	I:Chrna7	Chrna7	C	T	T	T	C	T	T	T	T	T	T	T	T
7	63162060	rs31306884	A/G	I:Chrna7	Chrna7	A	G	G	G	A	G	G	G	G	G	G	G	G
7	63162493	rs31649594	C/T	I:Chrna7	Chrna7	C	T	T	T	C	T	T	T	T	T	T	T	T
7	63162983	rs33902615	C/G	I:Chrna7	Chrna7	C	C	G	G	C	G	G	G	C	G	C	G	G
7	63163027	rs32494738	C/T	I:Chrna7	Chrna7	T	C	C	C	T	C	C	C	C	C	C	C	C
7	63163148	rs31426792	A/G	I:Chrna7	Chrna7	G	A	A	A	G	A	A	A	A	A	A	A	A
7	63163402	rs33902620	C/T	I:Chrna7	Chrna7	C	T	T	T	C	T	T	T	T	T	T	T	T
7	63163404	rs231876201	C/T	I:Chrna7	Chrna7	C	T	T	T	C	T	T	T	T	T	T	T	T
7	63163433	rs33902621	A/G	I:Chrna7	Chrna7	A	G	G	G	A	G	G	G	G	G	G	G	G
7	63163494	rs226944185	A/G	I:Chrna7	Chrna7	A	G	G	G	A	G	G	G	G	G	G	G	G
7	63163501	rs211701415	A/G	I:Chrna7	Chrna7	A	G	G	G	A	G	G	G	G	G	G	G	G
7	63163674	rs251826117	A/G	I:Chrna7	Chrna7	G	G			G				G		G	A	A
7	63163860	rs584149810	C/G	I:Chrna7	Chrna7		G	G	G	C	G	G	G	G		G	G
7	63163929	rs33902622	C/T	I:Chrna7	Chrna7	T	C	C	C	T	C	C	C	C	C	C	C	C
7	63164012	rs229751309	indel	I:Chrna7	Chrna7		0	1	1		1	1	1		1		1	1
7	63164021		indel		Chrna7	1	0			1
7	63164234	rs51230615	A/C	I:Chrna7	Chrna7	C	A	A	A	C	A	A	A	A	A	A	A	A
7	63164415	rs243833792	C/G	I:Chrna7	Chrna7	C	G	G	G	C	G	G	G	G	G	G	G	G
7	63164428	rs264964593	C/G	I:Chrna7	Chrna7	C	G	G	G	C	G	G	G	G	G	G	G	G
7	63164508	rs48923570	G/T	I:Chrna7	Chrna7	G	T	T	T	G	T	T	T	T	T	T	T	T
7	63164517	rs258826233	A/G	I:Chrna7	Chrna7	G	A	A	A	G	A	A	A	A	A	A	A	A
7	63164524	rs218767725	C/T	I:Chrna7	Chrna7	C	T	T	T	C	T	T	T	T	T	T	T	T
7	63164526	rs232654868	A/T	I:Chrna7	Chrna7	T	A	A	A	T	A	A	A	A	A	A	A	A
7	63164544	rs245816435	C/T	I:Chrna7	Chrna7	C	T	T	T	C	T	T	T	T	T	T	T	T
7	63164568	rs232025482	A/C	I:Chrna7	Chrna7	A	C	C	C	A	C	C	C	C	C	C	C	C
7	63164653	rs248127903	A/T	I:Chrna7	Chrna7	T	A	A	A	T	A	A	A	A	A	A	A	A
7	63164665	rs45985414	A/G	I:Chrna7	Chrna7	A	G	G	G	A	G	G	G	G	G	G	G	G
7	63164676	rs47039404	A/G	I:Chrna7	Chrna7	A	G	G	G	A	G	G	G	G	G	G	G	G
7	63164710	rs48084211	A/C	I:Chrna7	Chrna7	C	A	A	A	C	A	A	A	A	A	A	A	A
7	63164713	rs52414684	C/T	I:Chrna7	Chrna7	T	C	C	C	T	C	C	C	C	C	C	C	C
7	63164816	rs33902625	C/G	I:Chrna7	Chrna7	C	G	G	G	C	G	G	G	G	G	G	G	G
7	63164837	rs33902626	A/G	I:Chrna7	Chrna7	G	A	A	A	G	A	A	A	A	A	A	A	A
7	63164979	rs32390537	C/T	I:Chrna7	Chrna7	T	C	C	C	T	C	C	C	C	C	C	C	C
7	63165138	rs32010329	A/G	I:Chrna7	Chrna7	A	G	G	G	A	G	G	G	G	G	G	G	G
7	63165144	rs31569027	C/T	I:Chrna7	Chrna7	T	C	C	C	T	C	C	C	C	C	C	C	C
7	63165160	rs215324600	indel	I:Chrna7	Chrna7	1	0			1
7	63165225	rs31276931	A/G	I:Chrna7	Chrna7	G	A	A	A	G	A	A	A	A	A	A	A	A
7	63165339	rs253951006	indel	I:Chrna7	Chrna7	1	0			1
7	63165533	rs32204929	A/G	I:Chrna7	Chrna7	G	A	A	A	G	A	A	A	A	A	A	A	A
7	63165538	rs31185222	A/T	I:Chrna7	Chrna7	T	A	A	A	T	A	A	A	A	A	A	A	A
7	63165796	rs31836284	A/C	I:Chrna7	Chrna7	A	C	C	C	A	C	C	C	C	C	C	C	C
7	63165849	rs234801994	indel	I:Chrna7	Chrna7	1	0			1
7	63165880	rs32381857	A/C	I:Chrna7	Chrna7	A	C	C	C	A	C	C	C	C	C	C	C	C
7	63165892	rs32079178	A/T	I:Chrna7	Chrna7	T	A	A	A	T	A	A	A	A	A	A	A	A
7	63165905	rs219363923	indel	I:Chrna7	Chrna7	1	0			1
7	63166197	rs32308267	G/T	I:Chrna7	Chrna7	G	T	T	T	G	T	T	T	T	T	T	T	T
7	63166214	rs237925478	indel	I:Chrna7	Chrna7		0	2	2		2	2					2	2
7	63166219	rs251117496	indel	I:Chrna7	Chrna7	1	0			1
7	63166358	rs31065995	C/T	I:Chrna7	Chrna7	T	C	C	C	T	C	C	C	C	C	C	C	C
7	63166369	rs32024614	C/T	I:Chrna7	Chrna7	T	C	C	C	T	C	C	C	C	C	C	C	C
7	63166472	rs32153817	A/G	I:Chrna7	Chrna7	G	A	A	A	G	A	A	A	A	A	A	A	A
7	63166513	rs31647641	C/T	I:Chrna7	Chrna7	T	C	C	C	T	C	C	C	C	C	C	C	C
7	63166514	rs31657968	G/T	I:Chrna7	Chrna7	T	G	G	G	T	G	G	G	G	G	G	G	G
7	63166681	rs32457235	A/G	I:Chrna7	Chrna7	G	A	A	A	G	A	A	A	A	A	A	A	A
7	63166974	rs32534079	G/T	I:Chrna7	Chrna7	T	G	G	G	T	G	G	G	G	G	G	G	G
7	63167044	rs31466835	A/C	I:Chrna7	Chrna7	C	A	A	A	C	A	A	A	A	A	A	A	A
7	63167079	rs31893053	A/C	I:Chrna7	Chrna7	A	C	C	C	A	C	C	C	C	C	C	C	C
7	63167086	rs249849202	indel	I:Chrna7	Chrna7	1	0			1
7	63167106	rs31043740	A/C	I:Chrna7	Chrna7	A	C	C	C	A	C	C	C	C	C	C	C	C
7	63167241	rs50881889	C/T	I:Chrna7	Chrna7	C	T	T	T	C	T	T	T	T	T	T	T	T
7	63167311	rs245011045	A/C	I:Chrna7	Chrna7	C	A	A	A	C	A	A	A	A	A	A	A	A
7	63167324	rs214430933	C/T	I:Chrna7	Chrna7	C	T	T	T	C	T	T	T	T	T	T	T	T
7	63167325	rs234756560	A/G	I:Chrna7	Chrna7	A	G	G	G	A	G	G	G	G	G	G	G	G
7	63167335	rs254375052	C/T	I:Chrna7	Chrna7	T	C	C	C	T	C	C	C	C	C	C	C	C
7	63167346	rs218301132	A/T	I:Chrna7	Chrna7	A	T	T	T	A	T	T	T	T	T	T	T	T
7	63167367	rs243307118	A/G	I:Chrna7	Chrna7	G	A	A	A	G	A	A	A	A	A	A	A	A
7	63167405	rs251464276	G/T	I:Chrna7	Chrna7	T	G	G	G	T	G	G	G	G	G	G	G	G
7	63167406	rs221652310	A/G/T	I:Chrna7	Chrna7	G	T	T	T	G	T	T	T	T	T	T	T	T
7	63167467	rs33902633	A/G	I:Chrna7	Chrna7	A	G	G	G	A	G	G	G	G	G	G	G	G
7	63167498	rs33902634	A/G	I:Chrna7	Chrna7	A	G	G	G	A	G	G	G	G	G	G	G	G
7	63167508	rs33902635	A/G	I:Chrna7	Chrna7	G	G	A	A	G	A	A	A	G	A	G	A	A
7	63167599	rs32258883	A/T	I:Chrna7	Chrna7	A	T	T	T	A	T	T	T	T	T	T	T	T
7	63167600	rs864315207	A/C	I:Chrna7	Chrna7	C	A	A	A	C	A	A	A	A	A	A	A	A
7	63167622	rs31686945	G/T	I:Chrna7	Chrna7	T	G	G	G	T	G	G	G	G	G	G	G	G
7	63167648	rs32189419	A/G	I:Chrna7	Chrna7	A	G	G	G	A	G	G	G	G	G	G	G	G
7	63167702	rs32483950	C/T	I:Chrna7	Chrna7	T	C	C	C	T	C	C	C	C	C	C	C	C
7	63167836	rs31419633	A/G	I:Chrna7	Chrna7	A	G	G	G	A	G	G	G	G	G	G	G	G
7	63168252	rs33902640	G/T	I:Chrna7	Chrna7	G	T	T	T	G	T	T	T	T	T	T	T	T
7	63168527	rs32132087	C/G	I:Chrna7	Chrna7	G	C	C	C	G	C	C	C	C	C	C	C	C
7	63168846	rs33902643	A/G	I:Chrna7	Chrna7	G	A	A	A	G	A	A	A	A	A	A	A	A
7	63168909	rs33902644	A/G	I:Chrna7	Chrna7	G	A	A	A	G	A	A	A	A	A	A	A	A
7	63169019	rs33902646	A/G	I:Chrna7	Chrna7	G	A	A	A	G	A	A	A	A	A	A	A	A
7	63169084	rs219667808	indel	I:Chrna7	Chrna7		0			1
7	63169127	rs33902648	A/G	I:Chrna7	Chrna7	G	A	A	A	G	A	A	A	A	A	A	A	A
7	63169148	rs33902649	A/G	I:Chrna7	Chrna7	G	A	A	A	G	A	A	A	A	A	A	A	A
7	63169176	rs33902650	C/G	I:Chrna7	Chrna7	C	G	G	G	C	G	G	G	G	G	G	G	G
7	63169205	rs33902651	C/T	I:Chrna7	Chrna7	C	T	T	T	C	T	T	T	T	T	T	T	T
7	63169218	rs33902652	G/T	I:Chrna7	Chrna7	G	T	T	T	G	T	T	T	T	T	T	T	T
7	63169297	rs33902653	G/T	I:Chrna7	Chrna7	T	G	G	G	T	G	G	G	G	G	G	G	G
7	63169634	rs33902654	C/G	I:Chrna7	Chrna7	C	G	G	G	C	G	G	G	G	G	G	G	G
7	63169693	rs33902655	C/T	I:Chrna7	Chrna7	T	C	C	C	T	C	C	C	C	C	C	C	C
7	63169786	rs52198972	A/G	I:Chrna7	Chrna7	G	A	A	A	G	A	A	A	A	A	A	A	A
7	63169979	rs251037493	indel	I:Chrna7	Chrna7	1	0
7	63170333	rs260172782	A/G	I:Chrna7	Chrna7	A	G	G	G	A	G	G	G	G	G	G	G	G
7	63170480	rs31379776	A/G	I:Chrna7	Chrna7	A	G	G	G	A	G	G	G	G	G	G	G	G
7	63170503	rs32135318	A/G	I:Chrna7	Chrna7	G	A	A	A	G	A	A	A	A	A	A	A	A
7	63170708	rs33902659	C/G	I:Chrna7	Chrna7	C	G	G	G	C	G	G	G	G	G	G	G	G
7	63171062	rs263303816	indel	I:Chrna7	Chrna7		0	1	1		1	1	1		1		1	1
7	63171072	rs259403350	indel	I:Chrna7	Chrna7	1	0			1
7	63171241	rs220866157	A/G	I:Chrna7	Chrna7		A	G	A	G	G	G	G	A	G	A		G
7	63171249	rs31308199	C/T	I:Chrna7	Chrna7		C	C	C	T	C	C	C	C	C
7	63172755	rs33902663	A/G	I:Chrna7	Chrna7	A	G	G	G	A	G	G	G	G	G	G	G	G
7	63172802	rs32357611	A/T	I:Chrna7	Chrna7	T	A	A	A	T	A	A	A	A	A	A	A	A
7	63172957	rs33902666	A/G	I:Chrna7	Chrna7	G	A	A	A	G	A	A	A	A	A	A	A	A
7	63173007	rs249776726	indel	I:Chrna7	Chrna7	1	0			1
7	63173065	rs228779547	indel	I:Chrna7	Chrna7	1	0			1
7	63173261	rs33902668	G/T	I:Chrna7	Chrna7	T	G	G	G	T	G	G	G	G	G	G	G	G
7	63173395	rs33902669	G/T	I:Chrna7	Chrna7	G	T	T	T	G	T	T	T	T	T	T	T	T
7	63173547	rs33902671	A/G	I:Chrna7	Chrna7	A	G	G	G	A	G	G	G	G	G	G	G	G
7	63173620	rs33902672	A/G	I:Chrna7	Chrna7	A	G	G	G	A	G	G	G	G	G	G	G	G
7	63173685	rs51281329	A/G	I:Chrna7	Chrna7	A	G	G	G	A	G	G	G	G	G	G	G	G
7	63173699	rs46857247	C/G	I:Chrna7	Chrna7	G	C	C	C	G	C	C	C	C	C	C	C	C
7	63173749	rs49072989	C/T	I:Chrna7	Chrna7	C	T	T	T	C	T	T	T	T	T	T	T	T
7	63173847	rs50384477	A/G	I:Chrna7	Chrna7	G	A	A	A	G	A	A	A	A	A	A	A	A
7	63174255	rs49333164	A/T	I:Chrna7	Chrna7	A	T	T	T	A	T	T	T	T	T	T	T	T
7	63174355	rs47465212	A/T	I:Chrna7	Chrna7	T	A	A	A	T	A	A	A	A	A	A	A	A
7	63174623	rs31352280	C/T	I:Chrna7	Chrna7	T	C	C	C	T	C	C	C	C	C	C	C	C
7	63175313	rs32255679	A/C	I:Chrna7	Chrna7	A	C	C	C	A	C	C	C	C	C	C	C	C
7	63175387	rs213570168	indel	I:Chrna7	Chrna7	1	0			1
7	63175502	rs32245654	A/T	I:Chrna7	Chrna7	A	T	T	T	A	T	T	T	T	T	T	T	T
7	63175686	rs31736685	A/G	I:Chrna7	Chrna7	A	G	G	G	A	G	G	G	G	G	G	G	G
7	63176040	rs252686106	A/G	I:Chrna7	Chrna7	G	A	A	A	G	A	A	A	A	A	A	A	A
7	63176230	rs50064241	C/T	I:Chrna7	Chrna7	C	T	T	T	C	T	T	T	T	T	T	T	T
7	63176605	rs32148799	A/T	I:Chrna7	Chrna7	A	T	T	T	A	T	T	T	T	T	T	T	T
7	63176800	rs31541117	A/T	I:Chrna7	Chrna7	T	A	A	A	T	A	A	A	A	A	A	A	A
7	63176866	rs32173522	A/C	I:Chrna7	Chrna7	A	C	C	C	A	C	C	C	C	C	C	C	C
7	63177011	rs31866010	A/G	I:Chrna7	Chrna7	G	A	A	A	G	A	A	A	A	A	A	A	A
7	63177019	rs31384549	C/T	I:Chrna7	Chrna7	T	C	C	C	T	C	C	C	C	C	C	C	C
7	63177131	rs31338905	A/G	I:Chrna7	Chrna7	G	A	A	A	G	A	A	A	A	A	A	A	A
7	63177133	rs31894447	A/G	I:Chrna7	Chrna7	G	A	A	A	G	A	A	A	A	A	A	A	A
7	63177173	rs32300198	C/T	I:Chrna7	Chrna7	C	T	T	T	C	T	T	T	T	T	T	T	T
7	63177518	rs32428443	A/C/T	I:Chrna7	Chrna7	C	T	T	T	C	T	T	T	T	T	T	T	T
7	63177548	rs31575974	C/T	I:Chrna7	Chrna7	T	C	C	C	T	C	C	C	C	C	C	C	C
7	63177764	rs31427661	A/C	I:Chrna7	Chrna7	A	C	C	C	A	C	C	C	C	C	C	C	C
7	63177803	rs32407704	A/G	I:Chrna7	Chrna7	G	A	A	A	G	A	A	A	A	A	A	A	A
7	63177974	rs32455801	A/G	I:Chrna7	Chrna7	A	G	G	G	A	G	G	G	G	G	G	G	G
7	63177983	rs31446388	G/T	I:Chrna7	Chrna7	G	T	T	T	G	T	T	T	T	T	T	T	T
7	63178113	rs33902685	C/T	I:Chrna7	Chrna7	C	T	T	T	C	T	T	T	T	T	T	T	T
7	63178141	rs239346765	A/G	I:Chrna7	Chrna7	A	G	G	G	A	G	G	G	G	G	G	G	G
7	63178148	rs251241479	indel	I:Chrna7	Chrna7	1	0			1
7	63178244	rs33902689	C/T	I:Chrna7	Chrna7	T	C	C	C	T	C	C	C	C	C	C	C	C
7	63178325	rs239392696	indel	I:Chrna7	Chrna7	1	0			1
7	63178327	rs224247904	indel	I:Chrna7	Chrna7		0	1
7	63178333	rs246577645	G/T	I:Chrna7	Chrna7		T				T			T		T	G	T
7	63178462	rs31715579	A/G	I:Chrna7	Chrna7	A	G	G	G	A	G	G	G	G	G	G	G	G
7	63178467	rs32121503	C/T	I:Chrna7	Chrna7	T	C	C	C	T	C	C	C	C	C	C	C	C
7	63178583	rs257864913	indel	I:Chrna7	Chrna7	1	0			1
7	63178710	rs31482657	A/T	I:Chrna7	Chrna7	A	T	T	T	A	T	T	T	T	T	T	T	T
7	63178853	rs32030258	C/T	I:Chrna7	Chrna7	T	C	C	C	T	C	C	C	C	C	C	C	C
7	63178858	rs31823588	A/G	I:Chrna7	Chrna7	G	A	A	A	G	A	A	A	A	A	A	A	A
7	63178909	rs32125277	A/G	I:Chrna7	Chrna7	A	G	G	G	A	G	G	G	G	G	G	G	G
7	63178967	rs31303725	C/T	I:Chrna7	Chrna7	C	T	T	T	C	T	T	T	T	T	T	T	T
7	63178985	rs31900569	A/G	I:Chrna7	Chrna7	A	G	G	G	A	G	G	G	G	G	G	G	G
7	63179180	rs32324453	A/G	I:Chrna7	Chrna7	A	G	G	G	A	G	G	G	G	G	G	G	G
7	63179289	rs31429308	C/T	I:Chrna7	Chrna7	C	T	T	T	C	T	T	T	T	T	T	T	T
7	63179420	rs31514762	A/G	I:Chrna7	Chrna7	G	A	A	A	G	A	A	A	A	A	A	A	A
7	63179535	rs31095626	C/T	I:Chrna7	Chrna7	T	C	T	T	T	T	T	T	C	T	C	T	T
7	63179728	rs51297931	A/G	I:Chrna7	Chrna7	G	A	A	A	G	A	A	A	A	A	A	A	A
7	63179735	rs33902691	A/G	I:Chrna7	Chrna7	G	A	A	A	G	A	A	A	A	A	A	A	A
7	63179756	rs250922232	indel	I:Chrna7	Chrna7		0			1
7	63179908	rs31234081	C/T	I:Chrna7	Chrna7	T	C	C	C	T	C	C	C	C	C	C	C	C
7	63180025	rs31407061	C/T	I:Chrna7	Chrna7	T	C	T	T	T	T	T	T	C	T	C	T	T
7	63180083	rs31109050	C/T	I:Chrna7	Chrna7	T	C	C	C	T	C	C	C	C	C	C	C	C
7	63180523	rs33902692	C/T	I:Chrna7	Chrna7	T	C	C	C	T	C	C	C	C	C	C	C	C
7	63180690	rs31429061	A/G	I:Chrna7	Chrna7	G	A	A	A	G	A	A	A	A	A	A	A	A
7	63180787	rs32172554	C/T	I:Chrna7	Chrna7	C	T	T	T	C	T	T	T	T	T	T	T	T
7	63180851	rs240090265	indel	I:Chrna7	Chrna7	1	0			1
7	63180925	rs31562683	A/T	I:Chrna7	Chrna7	A	T	T	T	A	T	T	T	T	T	T	T	T
7	63180929	rs31728366	A/G	I:Chrna7	Chrna7	A	G	G	G	A	G	G	G	G	G	G	G	G
7	63181094		indel		Chrna7	1	0			1
7	63181181	rs31809386	A/G	I:Chrna7	Chrna7	G	A	A	A	G	A	A	A	A	A	A	A	A
7	63181323	rs220672375	A/C	I:Chrna7	Chrna7	A	C	C	C	A	C	C	C	C	C	C	C	C
7	63181341	rs31549599	G/T	I:Chrna7	Chrna7	G	T	T	T	G	T	T	T	T	T	T	T	T
7	63181467	rs48930148	C/T	I:Chrna7	Chrna7	T	C	C	C	T	C	C	C	C	C	C	C	C
7	63181480	rs48300157	A/G	I:Chrna7	Chrna7	A	G	G	G	A	G	G	G	G	G	G	G	G
7	63181658	rs233414689	indel	I:Chrna7	Chrna7	1	0			1
7	63181879	rs51557973	G/T	I:Chrna7	Chrna7	T	G	G	G	T	G	G	G	G	G	G	G	G
7	63181907	rs266179193	indel	I:Chrna7	Chrna7	1	0			1
7	63181973	rs52554486	C/T	I:Chrna7	Chrna7	C	T	T	T	C	T	T	T	T	T	T	T	T
7	63182009	rs243103082	indel	I:Chrna7	Chrna7	1	0			1
7	63182038	rs52128495	C/T	I:Chrna7	Chrna7	T	C	C	C	T	C	C	C	C	C	C	C	C
7	63182057	rs52082063	A/G	I:Chrna7	Chrna7	G	A	A	A	G	A	A	A	A	A	A	A	A
7	63182064	rs52443858	G/T	I:Chrna7	Chrna7	G	T	T	T	G	T	T	T	T	T	T	T	T
7	63182168	rs49712306	G/T	I:Chrna7	Chrna7	G	T	T	T	G	T	T	T	T	T	T	T	T
7	63182283	rs48824677	G/T	I:Chrna7	Chrna7	T	G	G	G	T	G	G	G	G	G	G	G	G
7	63182302	rs49926076	C/T	I:Chrna7	Chrna7	C	T	T	T	C	T	T	T	T	T	T	T	T
7	63182320	rs48902037	C/T	I:Chrna7	Chrna7	C	T	T	T	C	T	T	T	T	T	T	T	T
7	63182325	rs47147710	A/G	I:Chrna7	Chrna7	A	G	G	G	A	G	G	G	G	G	G	G	G
7	63182362	rs47852679	A/T	I:Chrna7	Chrna7	T	A	A	A	T	A	A	A	A	A	A	A	A
7	63182402	rs49314287	C/T	I:Chrna7	Chrna7	T	C	C	C	T	C	C	C	C	C	C	C	C
7	63182449	rs48507789	C/T	I:Chrna7	Chrna7	T	C	C	C	T	C	C	C	C	C	C	C	C
7	63182470	rs50822211	A/G	I:Chrna7	Chrna7	G	A	A	A	G	A	A	A	A	A	A	A	A
7	63182479	rs51336684	A/T	I:Chrna7	Chrna7	A	T	T	T	A	T	T	T	T	T	T	T	T
7	63182549	rs49741630	A/T	I:Chrna7	Chrna7	A	T	T	T	A	T	T	T	T	T	T	T	T
7	63182550	rs48036048	C/T	I:Chrna7	Chrna7	T	C	C	C	T	C	C	C	C	C	C	C	C
7	63182562	rs45663315	C/T	I:Chrna7	Chrna7	T	C	C	C	T	C	C	C	C	C	C	C	C
7	63182604	rs50349899	A/G	I:Chrna7	Chrna7	A	G	G	G	A	G	G	G	G	G	G	G	G
7	63182611	rs47366554	A/G	I:Chrna7	Chrna7	G	A	A	A	G	A	A	A	A	A	A	A	A
7	63182640	rs51527266	A/C	I:Chrna7	Chrna7	C	A	A	A	C	A	A	A	A	A	A	A	A
7	63182643	rs46201279	C/T	I:Chrna7	Chrna7	T	C	C	C	T	C	C	C	C	C	C	C	C
7	63182674	rs47987130	C/T	I:Chrna7	Chrna7	C	T	T	T	C	T	T	T	T	T	T	T	T
7	63182691	rs51732126	C/T	I:Chrna7	Chrna7	C	T	T	T	C	T	T	T	T	T	T	T	T
7	63182692	rs50447897	A/G	I:Chrna7	Chrna7	A	G	G	G	A	G	G	G	G	G	G	G	G
7	63182702	rs47542627	G/T	I:Chrna7	Chrna7	T	G	G	G	T	G	G	G	G	G	G	G	G
7	63182760	rs246625164	indel	I:Chrna7	Chrna7	1	0			1
7	63182887	rs50635966	A/T	I:Chrna7	Chrna7	T	A	A	A	T	A	A	A	A	A	A	A	A
7	63183013	rs258143696	indel	I:Chrna7	Chrna7	1	0	1	1	1	1	1	1		1		1	1
7	63183075	rs50141969	A/C	I:Chrna7	Chrna7	C	A	A	A	C	A	A	A	A	A	A	A	A
7	63183089	rs49205798	A/G	I:Chrna7	Chrna7	G	A	A	A	G	A	A	A	A	A	A	A	A
7	63183111	rs33902696	A/G	I:Chrna7	Chrna7	A	G	G	G	A	G	G	G	G	G	G	G	G
7	63183269	rs50084159	C/T	I:Chrna7	Chrna7	T	C	C	C	T	C	C	C	C	C	C	C	C
7	63183272	rs50502047	C/T	I:Chrna7	Chrna7	T	C	C	C	T	C	C	C	C	C	C	C	C
7	63183313	rs33902697	C/T	I:Chrna7	Chrna7	T	C	C	C	T	C	C	C	C	C	C	C	C
7	63183348	rs51300361	G/T	I:Chrna7	Chrna7	T	G	G	G	T	G	G	G	G	G	G	G	G
7	63183378	rs50627693	A/G	I:Chrna7	Chrna7	A	G	G	G	A	G	G	G	G	G	G	G	G
7	63183404	rs50192231	C/T	I:Chrna7	Chrna7	T	C	C	C	T	C	C	C	C	C	C	C	C
7	63183477	rs233157391	indel	I:Chrna7	Chrna7	1	0	1	1	1	1	1	1		1		1	1
7	63183584	rs51086932	A/C/T	I:Chrna7	Chrna7	A	C	C	C	A	C	C	C	C	C	C	C	C
7	63183621	rs48824379	C/T	I:Chrna7	Chrna7	T	C	C	C	T	C	C	C	C	C	C	C	C
7	63183654	rs48394162	A/G	I:Chrna7	Chrna7	A	G	G	G	A	G	G	G	G	G	G	G	G
7	63183655	rs51288269	C/G	I:Chrna7	Chrna7	C	G	G	G	C	G	G	G	G	G	G	G	G
7	63183719	rs49997654	A/G	I:Chrna7	Chrna7	A	G	G	G	A	G	G	G	G	G	G	G	G
7	63183754	rs51756076	C/T	I:Chrna7	Chrna7	T	C	C	C	T	C	C	C	C	C	C	C	C
7	63183775	rs48957263	C/G	I:Chrna7	Chrna7	C	G	G	G	C	G	G	G	G	G	G	G	G
7	63183779	rs50260985	G/T	I:Chrna7	Chrna7	T	G	G	G	T	G	G	G	G	G	G	G	G
7	63183873	rs45992846	C/T	I:Chrna7	Chrna7	T	C	C	C	T	C	C	C	C	C	C	C	C
7	63183917	rs48720304	A/G	I:Chrna7	Chrna7	G	A	A	A	G	A	A	A	A	A	A	A	A
7	63183920	rs49737641	A/C	I:Chrna7	Chrna7	C	A	A	A	C	A	A	A	A	A	A	A	A
7	63184095	rs230744668	A/G	I:Chrna7	Chrna7	G	G	A	A	G	A	A	A	G	A	G	A	A
7	63184143	rs51766132	G/T	I:Chrna7	Chrna7	T	G	G	G	T	G	G	G	G	G	G	G	G
7	63184332	rs33902698	A/G	I:Chrna7	Chrna7	A	G	G	G	A	G	G	G	G	G	G	G	G
7	63184353	rs33902699	A/C	I:Chrna7	Chrna7	A	C	C	C	A	C	C	C	C	C	C	C	C
7	63184377	rs47798579	A/G	I:Chrna7	Chrna7	A	G	G	G	A	G	G	G	G	G	G	G	G
7	63184425	rs46278332	C/T	I:Chrna7	Chrna7	T	C	C	C	T	C	C	C	C	C	C	C	C
7	63184430	rs50340028	G/T	I:Chrna7	Chrna7	G	T	T	T	G	T	T	T	T	T	T	T	T
7	63184435	rs49572374	A/G	I:Chrna7	Chrna7	G	G	A	A	G	A	A	A	G	A	G	A	A
7	63184563	rs219136579	indel	I:Chrna7	Chrna7	1	0			1
7	63184582	rs31908838	C/T	I:Chrna7	Chrna7	C	T	T	T	C	T	T	T	T	T	T	T	T
7	63184601	rs31472904	A/C	I:Chrna7	Chrna7	C	A	A	A	C	A	A	A	A	A	A	A	A
7	63184706	rs31143016	A/G	I:Chrna7	Chrna7	A	G	G	G	A	G	G	G	G	G	G	G	G
7	63185097	rs31794147	A/G	I:Chrna7	Chrna7	A	G	G	G	A	G	G	G	G	G	G	G	G
7	63185373	rs31648742	A/G	I:Chrna7	Chrna7	A	G	G	G	A	G	G	G	G	G	G	G	G
7	63185593	rs231583607	A/G	I:Chrna7	Chrna7	G	A	A	A	G	A	A	A	A	A	A	A	A
7	63185648	rs32241406	A/G	I:Chrna7	Chrna7	A	G	G	G	A	G	G	G	G	G	G	G	G
7	63185813	rs263101814	indel	I:Chrna7	Chrna7	1	0			1
7	63186057	rs31599832	A/T	I:Chrna7	Chrna7	A	T	T	T	A	T	T	T	T	T	T	T	T
7	63186450	rs32218808	A/G	I:Chrna7	Chrna7	G	A	A	A	G	A	A	A	A	A	A	A	A
7	63186557	rs226566114	C/G	I:Chrna7	Chrna7	C	C	G	C	C	C	C	C	C	C	C	C	C
7	63186667	rs31481239	A/C/G	I:Chrna7	Chrna7	C	G	G	G	C	G	G	G	G	G	G	G	G
7	63186703	rs32476485	A/G	I:Chrna7	Chrna7	G	A	A	A	G	A	A	A	A	A	A	A	A
7	63186917	rs31385261	C/T	I:Chrna7	Chrna7	C	T	T	T	C	T	T	T	T	T	T	T	T
7	63186933	rs31384547	C/T	I:Chrna7	Chrna7	T	C	C	C	T	C	C	C	C	C	C	C	C
7	63187087	rs31658738	A/G	I:Chrna7	Chrna7	A	G	G	G	A	G	G	G	G	G	G	G	G
7	63187187	rs31103593	G/T	I:Chrna7	Chrna7	G	T	T	T	G	T	T	T	T	T	T	T	T
7	63187269	rs250440648	indel	I:Chrna7	Chrna7	1	0			1
7	63187289		indel		Chrna7	1	0			1
7	63187367	rs32384611	A/T	I:Chrna7	Chrna7	T	A	A	A	T	A	A	A	A	A	A	A	A
7	63187688	rs31816256	A/G	I:Chrna7	Chrna7	G	A	A	A	G	A	A	A	A	A	A	A	A
7	63187710	rs31901352	A/G	I:Chrna7	Chrna7	A	G	G	G	A	G	G	G	G	G	G	G	G
7	63187969	rs31090606	C/T	I:Chrna7	Chrna7	C	T	T	T	C	T	T	T	T	T	T	T	T
7	63187973	rs31826346	C/T	I:Chrna7	Chrna7	T	C	C	C	T	C	C	C	C	C	C	C	C
7	63188094	rs32293821	C/T	I:Chrna7	Chrna7	T	C	C	C	T	C	C	C	C	C	C	C	C
7	63188109	rs32097266	A/G	I:Chrna7	Chrna7	A	G	G	G	A	G	G	G	G	G	G	G	G
7	63188219	rs32234518	C/T	I:Chrna7	Chrna7	T	C	C	C	T	C	C	C	C	C	C	C	C
7	63188221	rs218233365	indel	I:Chrna7	Chrna7	1	0			1
7	63188234	rs31753829	C/T	I:Chrna7	Chrna7	T	C	C	C	T	C	C	C	C	C	C	C	C
7	63188299	rs31273318	C/G	I:Chrna7	Chrna7	G	C	C	C	G	C	C	C	C	C	C	C	C
7	63188402	rs32046765	G/T	I:Chrna7	Chrna7	T	G	G	G	T	G	G	G	G	G	G	G	G
7	63188441	rs31514295	C/G	I:Chrna7	Chrna7	G	C	C	C	G	C	C	C	C	C	C	C	C
7	63188620	rs32396233	A/C	I:Chrna7	Chrna7	C	A	A	A	C	A	A	A	A	A	A	A	A
7	63188843	rs31523485	A/G	I:Chrna7	Chrna7	A	G	G	G	A	G	G	G	G	G	G	G	G
7	63188928	rs32330070	C/T	I:Chrna7	Chrna7	T	C	C	C	T	C	C	C	C	C	C	C	C
7	63188934	rs31097721	C/T	I:Chrna7	Chrna7	T	C	C	C	T	C	C	C	C	C	C	C	C
7	63188982	rs31655172	A/G	I:Chrna7	Chrna7	G	A	A	A	G	A	A	A	A	A	A	A	A
7	63188994	rs31928977	A/G	I:Chrna7	Chrna7	G	A	A	A	G	A	A	A	A	A	A	A	A
7	63189109	rs33902708	C/T	I:Chrna7	Chrna7	T	T	C	T	T	C	C	C	T	C	T	C	C
7	63189145	rs32522328	A/G	I:Chrna7	Chrna7	G	A	G	G	G	G	G	G	A	G	A	G	G
7	63189162	rs231147432	A/G	I:Chrna7	Chrna7	G	G	A	A	G	A	A	A	G	A	G	A	A
7	63189293	rs31854571	A/T	I:Chrna7	Chrna7	T	A	A	A	T	A	A	A	A	A	A	A	A
7	63189303	rs31433410	C/T	I:Chrna7	Chrna7	T	C	C	C	T	C	C	C	C	C	C	C	C
7	63189387	rs33902709	C/G	I:Chrna7	Chrna7	G	C	C	C	G	C	C	C	C	C	C	C	C
7	63189424	rs32404659	A/G	I:Chrna7	Chrna7	A	G	G	G	A	G	G	G	G	G	G	G	G
7	63189425	rs31349655	A/T	I:Chrna7	Chrna7	A	T	T	T	A	T	T	T	T	T	T	T	T
7	63189427	rs33902710	C/G	I:Chrna7	Chrna7	G	C	C	C	G	C	C	C	C	C	C	C	C
7	63189657	rs32516233	C/G	I:Chrna7	Chrna7	G	C	C	C	G	C	C	C	C	C	C	C	C
7	63189733	rs32326488	A/G	I:Chrna7	Chrna7	G	A	A	A	G	A	A	A	A	A	A	A	A
7	63190336	rs255626082	indel	I:Chrna7	Chrna7	1	0			1
7	63190496	rs49896699	A/G	I:Chrna7	Chrna7	G	A	A	A	G	A	A	A	A	A	A	A	A
7	63190553	rs33902713	A/G	I:Chrna7	Chrna7	A	G	G	G	A	G	G	G	G	G	G	G	G
7	63190611	rs45810192	A/G	I:Chrna7	Chrna7	A	G	G	G	A	G	G	G	G	G	G	G	G
7	63190657	rs50615260	C/T	I:Chrna7	Chrna7	C	T	T	T	C	T	T	T	T	T	T	T	T
7	63190663	rs50344357	A/T	I:Chrna7	Chrna7	A	T	T	T	A	T	T	T	T	T	T	T	T
7	63190664	rs46069101	C/T	I:Chrna7	Chrna7	T	C	C	C	T	C	C	C	C	C	C	C	C
7	63190794	rs248902386	indel	I:Chrna7	Chrna7	1	0			1
7	63190823	rs49428551	C/G	I:Chrna7	Chrna7	C	G	G	G	C	G	G	G	G	G	G	G	G
7	63190872	rs51113890	A/C	I:Chrna7	Chrna7	A	C	C	C	A	C	C	C	C	C	C	C	C
7	63190886	rs51603909	C/T	I:Chrna7	Chrna7	C	T	T	T	C	T	T	T	T	T	T	T	T
7	63190892	rs47477672	A/C	I:Chrna7	Chrna7	C	A	A	A	C	A	A	A	A	A	A	A	A
7	63190895	rs50278656	C/T	I:Chrna7	Chrna7	C	T	T	T	C	T	T	T	T	T	T	T	T
7	63190915	rs46300636	C/T	I:Chrna7	Chrna7	T	C	C	C	T	C	C	C	C	C	C	C	C
7	63190943	rs50677900	A/G	I:Chrna7	Chrna7	A	G	G	G	A	G	G	G	G	G	G	G	G
7	63190953	rs49818340	G/T	I:Chrna7	Chrna7	T	G	G	G	T	G	G	G	G	G	G	G	G
7	63190955	rs50177950	C/T	I:Chrna7	Chrna7	C	T	T	T	C	T	T	T	T	T	T	T	T
7	63191018	rs46074510	C/T	I:Chrna7	Chrna7	C	T	T	T	C	T	T	T	T	T	T	T	T
7	63191025	rs46716835	A/C	I:Chrna7	Chrna7	C	A	A	A	C	A	A	A	A	A	A	A	A
7	63191026	rs51172038	A/G	I:Chrna7	Chrna7	A	G	G	G	A	G	G	G	G	G	G	G	G
7	63191063	rs263815724	A/G	I:Chrna7	Chrna7	G	A	A	A	G	A	A	A	A	A	A	A	A
7	63191071	rs226916063	C/T	I:Chrna7	Chrna7	C	T	T	T	C	T	T	T	T	T	T	T	T
7	63191079	rs253825778	A/T	I:Chrna7	Chrna7	A	T	T	T	A	T	T	T	T	T	T	T	T
7	63191163	rs48798692	A/C	I:Chrna7	Chrna7	C	A	A	A	C	A	A	A	A	A	A	A	A
7	63191251	rs47371704	A/G	I:Chrna7	Chrna7	A	G	G	G	A	G	G	G	G	G	G	G	G
7	63191512	rs33902716	C/T	I:Chrna7	Chrna7	C	T	T	T	C	T	T	T	T	T	T	T	T
7	63191518	rs51030906	C/T	I:Chrna7	Chrna7	T	C	C	C	T	C	C	C	C	C	C	C	C
7	63191611	rs31905395	A/C	I:Chrna7	Chrna7	C	A	A	A	C	A	A	A	A	A	A	A	A
7	63191661	rs211925150	indel	I:Chrna7	Chrna7	1	0			1
7	63191706	rs31244294	A/C	I:Chrna7	Chrna7	C	A	A	A	C	A	A	A	A	A	A	A	A
7	63191707	rs52122321	A/G	I:Chrna7	Chrna7	A	G	G	G	A	G	G	G	G	G	G	G	G
7	63191880	rs33902721	C/T	I:Chrna7	Chrna7	C	T	T	T	C	T	T	T	T	T	T	T	T
7	63191887	rs249939832	C/T	I:Chrna7	Chrna7	T	C	C	C	T	C	C	C	C	C	C	C	C
7	63191933	rs33902722	C/T	I:Chrna7	Chrna7	C	T	T	T	C	T	T	T	T	T	T	T	T
7	63191954	rs33902723	A/G	I:Chrna7	Chrna7	G	A	A	A	G	A	A	A	A	A	A	A	A
7	63191972	rs33902724	A/G	I:Chrna7	Chrna7	G	A	A	A	G	A	A	A	A	A	A	A	A
7	63192025	rs33902725	A/G	I:Chrna7	Chrna7	A	G	G	G	A	G	G	G	G	G	G	G	G
7	63192044		indel		Chrna7	3	0
7	63192046	rs253060132	C/T	I:Chrna7	Chrna7	C	T	T	T	C	T	T	T	T	T	T	T	T
7	63192054	rs214904425	indel	I:Chrna7	Chrna7		0				1
7	63192105	rs233418904	indel	I:Chrna7	Chrna7	1	0			1
7	63192176	rs48476445	C/T	I:Chrna7	Chrna7	T	C	C	C	T	C	C	C	C	C	C	C	C
7	63192249	rs33902727	A/G	I:Chrna7	Chrna7	A	G	G	G	A	G	G	G	G	G	G	G	G
7	63192359	rs225607044	indel	I:Chrna7	Chrna7	1	0			1
7	63192427	rs33902728	A/G	I:Chrna7	Chrna7	G	A	A	A	G	A	A	A	A	A	A	A	A
7	63192435	rs33902729	C/T	I:Chrna7	Chrna7	C	T	T	T	C	T	T	T	T	T	T	T	T
7	63192476	rs33902730	C/G	I:Chrna7	Chrna7	C	G	G	G	C	G	G	G	G	G	G	G	G
7	63192536	rs33902732	A/T	I:Chrna7	Chrna7	T	A	A	A	T	A	A	A	A	A	A	A	A
7	63192543	rs48067382	C/G	I:Chrna7	Chrna7	G	C	C	C	G	C	C	C	C	C	C	C	C
7	63192582	rs218183252	indel	I:Chrna7	Chrna7	1	0			1
7	63192635	rs33902734	C/T	I:Chrna7	Chrna7	C	T	T	T	C	T	T	T	T	T	T	T	T
7	63192915	rs33902735	A/G	I:Chrna7	Chrna7	G	A	A	A	G	A	A	A	A	A	A	A	A
7	63192923	rs255558671	indel	I:Chrna7	Chrna7	1	0			1
7	63193066	rs266128665	A/G	I:Chrna7	Chrna7	G	A	A	A	G	A	A	A	A	A	A	A	A
7	63193103	rs227350163	A/G	I:Chrna7	Chrna7	A	G	G	G	A	G	G	G	G	G	G	G	G
7	63193237	rs247305696	C/T	I:Chrna7	Chrna7	C	T	T	T	C	T	T	T	T	T	T	T	T
7	63193266	rs257617473	C/T	I:Chrna7	Chrna7	C	T	T	T	C	T	T	T	T	T	T	T	T
7	63193271	rs226685664	A/G	I:Chrna7	Chrna7	G	A	A	A	G	A	A	A	A	A	A	A	A
7	63193288	rs213082736	A/C	I:Chrna7	Chrna7	C	A	A	A	C	A	A	A	A	A	A	A	A
7	63193307	rs242385334	A/G	I:Chrna7	Chrna7	G	A	A	A	G	A	A	A	A	A	A	A	A
7	63193315	rs33902736	C/G	I:Chrna7	Chrna7	C	G	G	G	C	G	G	G	G	G	G	G	G
7	63193473	rs247845702	indel	I:Chrna7	Chrna7	1	0			1
7	63193592	rs243722381	A/G	I:Chrna7	Chrna7	G	A	A	A	G	A	A	A	A	A	A	A	A
7	63193675	rs33902738	A/G	I:Chrna7	Chrna7	A	G	G	G	A	G	G	G	G	G	G	G	G
7	63193684	rs33902739	G/T	I:Chrna7	Chrna7	T	G	G	G	T	G	G	G	G	G	G	G	G
7	63193697	rs33902740	C/T	I:Chrna7	Chrna7	C	T	T	T	C	T	T	T	T	T	T	T	T
7	63193703	rs241245427	A/C	I:Chrna7	Chrna7	A	C	C	C	A	C	C	C	C	C	C	C	C
7	63193816	rs33902743	A/G	I:Chrna7	Chrna7	A	G	G	G	A	G	G	G	G	G	G	G	G
7	63193843	rs49400296	A/T	I:Chrna7	Chrna7	T	A	A	A	T	A	A	A	A	A	A	A	A
7	63193876	rs33902745	A/G	I:Chrna7	Chrna7	G	A	A	A	G	A	A	A	A	A	A	A	A
7	63194178	rs31905977	A/G	I:Chrna7	Chrna7	A	G	G	G	A	G	G	G	G	G	G	G	G
7	63194342	rs33902746	C/G	I:Chrna7	Chrna7	G	C	C	C	G	C	C	C	C	C	C	C	C
7	63194535	rs254688121	indel	I:Chrna7	Chrna7	1	0			1
7	63194578	rs232035537	indel	I:Chrna7	Chrna7	1	0			1
7	63194653	rs250999216	indel	I:Chrna7	Chrna7	1	0			1
7	63194738	rs33902752	A/C	I:Chrna7	Chrna7	A	C	C	C	A	C	C	C	C	C	C	C	C
7	63194858	rs33902753	A/G	I:Chrna7	Chrna7	G	A	A	A	G	A	A	A	A	A	A	A	A
7	63194980	rs244119452	A/C/T	I:Chrna7	Chrna7	A	C	C	C	A	C	C	C	C	C	C	C	C
7	63195076	rs33902754	G/T	I:Chrna7	Chrna7	T	G	G	G	T	G	G	G	G	G	G	G	G
7	63195130	rs33902755	A/G	I:Chrna7	Chrna7	A	G	G	G	A	G	G	G	G	G	G	G	G
7	63195174	rs33902756	A/T	I:Chrna7	Chrna7	A	T	T	T	A	T	T	T	T	T	T	T	T
7	63195186	rs32022045	A/G	I:Chrna7	Chrna7	A	G	G	G	A	G	G	G	G	G	G	G	G
7	63195251	rs32231742	A/G	I:Chrna7	Chrna7	G	A	A	A	G	A	A	A	A	A	A	A	A
7	63195364	rs31088744	A/C	I:Chrna7	Chrna7	A	C	C	C	A	C	C	C	C	C	C	C	C
7	63195421	rs31837166	A/G	I:Chrna7	Chrna7	A	G	G	G	A	G	G	G	G	G	G	G	G
7	63195547	rs31249284	A/G	I:Chrna7	Chrna7	G	A	A	A	G	A	A	A	A	A	A	A	A
7	63196068	rs33902759	A/C	I:Chrna7	Chrna7	A	C	C	C	A	C	C	C	C	C	C	C	C
7	63196086	rs49450327	C/T	I:Chrna7	Chrna7	C	T	T	T	C	T	T	T	T	T	T	T	T
7	63196281	rs33902762	A/G	I:Chrna7	Chrna7	G	A	A	A	G	A	A	A	A	A	A	A	A
7	63196336	rs33902763	A/G	I:Chrna7	Chrna7	A	G	G	G	A	G	G	G	G	G	G	G	G
7	63196373	rs33902764	C/T	I:Chrna7	Chrna7	C	T	T	T	C	T	T	T	T	T	T	T	T
7	63196563	rs51304663	A/G	I:Chrna7	Chrna7	A	G	G	G	A	G	G	G	G	G	G	G	G
7	63196571	rs258008250	indel	I:Chrna7	Chrna7	1	0			1
7	63196585		indel		Chrna7	1	0			1
7	63196650	rs33902766	C/T	I:Chrna7	Chrna7	C	T	T	T	C	T	T	T	T	T	T	T	T
7	63196744	rs33902767	A/G	I:Chrna7	Chrna7	G	A	A	A	G	A	A	A	A	A	A	A	A
7	63196838	rs33902768	A/G	I:Chrna7	Chrna7	A	G	G	G	A	G	G	G	G	G	G	G	G
7	63196920	rs50687548	A/C	I:Chrna7	Chrna7	C	A	A	A	C	A	A	A	A	A	A	A	A
7	63196921	rs48630457	C/G	I:Chrna7	Chrna7	C	G	G	G	C	G	G	G	G	G	G	G	G
7	63196966	rs33902769	C/T	I:Chrna7	Chrna7	C	T	T	T	C	T	T	T	T	T	T	T	T
7	63197009	rs33902770	A/G	I:Chrna7	Chrna7	G	A	A	A	G	A	A	A	A	A	A	A	A
7	63197091	rs51999951	A/G	I:Chrna7	Chrna7	A	G	G	G	A	G	G	G	G	G	G	G	G
7	63197092	rs33902771	A/G	I:Chrna7	Chrna7	A	G	G	G	A	G	G	G	G	G	G	G	G
7	63197115	rs242699197	indel	I:Chrna7	Chrna7	1	0			1
7	63197290	rs107694419	C/T	I:Chrna7	Chrna7	T	C	C	C	T	C	C	C	C	C	C	C	C
7	63197371	rs47478381	A/G	I:Chrna7	Chrna7	G	A	A	A	G	A	A	A	A	A	A	A	A
7	63197380	rs33902772	A/G	I:Chrna7	Chrna7	G	A	A	A	G	A	A	A	A	A	A	A	A
7	63197446	rs33902774	C/T	I:Chrna7	Chrna7	T	C	C	C	T	C	C	C	C	C	C	C	C
7	63197476	rs33902775	A/C	I:Chrna7	Chrna7	A	C	C	C	A	C	C	C	C	C	C	C	C
7	63197607	rs33902776	C/T	I:Chrna7	Chrna7	C	T	T	T	C	T	T	T	T	T	T	T	T
7	63197617	rs262662548	C/T	I:Chrna7	Chrna7	C	T	T	T	C	T	T	T	T	T	T	T	T
7	63197637	rs212474045	indel	I:Chrna7	Chrna7	1	0			1
7	63197676	rs33902777	C/T	I:Chrna7	Chrna7	C	T	T	T	C	T	T	T	T	T	T	T	T
7	63197700	rs33902778	A/G	I:Chrna7	Chrna7	A	G	G	G	A	G	G	G	G	G	G	G	G
7	63197738	rs33902780	C/G	I:Chrna7	Chrna7	G	C	C	C	G	C	C	C	C	C	C	C	C
7	63197809	rs52157050	C/T	I:Chrna7	Chrna7	T	C	C	C	T	C	C	C	C	C	C	C	C
7	63197835	rs249982239	indel	I:Chrna7	Chrna7	1	0			1
7	63197855	rs52175154	A/T	I:Chrna7	Chrna7	T	A	A	A	T	A	A	A	A	A	A	A	A
7	63197928	rs240812898	A/T	I:Chrna7	Chrna7	A	T	T	T	A	T	T	T	T	T	T	T	T
7	63198001	rs245477755	indel	I:Chrna7	Chrna7	1	0			1
7	63198011	rs33902782	A/G	I:Chrna7	Chrna7	G	A	A	A	G	A	A	A	A	A	A	A	A
7	63198049	rs52360817	C/T	I:Chrna7	Chrna7	T	C	C	C	T	C	C	C	C	C	C	C	C
7	63198104	rs33902783	C/T	I:Chrna7	Chrna7	C	T	T	T	C	T	T	T	T	T	T	T	T
7	63198297	rs33902786	A/G	I:Chrna7	Chrna7	G	A	A	A	G	A	A	A	A	A	A	A	A
7	63198395	rs33902787	A/G	I:Chrna7	Chrna7	G	A	A	A	G	A	A	A	A	A	A	A	A
7	63198487	rs225804006	indel	I:Chrna7	Chrna7	1	0			1
7	63198508	rs33902788	C/T	I:Chrna7	Chrna7	C	T	T	T	C	T	T	T	T	T	T	T	T
7	63198526	rs51283861	A/G	I:Chrna7	Chrna7	G	A	A	A	G	A	A	A	A	A	A	A	A
7	63198559	rs49912140	A/G	I:Chrna7	Chrna7	A	G	G	G	A	G	G	G	G	G	G	G	G
7	63198567				Chrna7		C	C	C	T	C	C	C	C	C	C	C	C
7	63198569		indel		Chrna7	1	0
7	63198596	rs45986238	C/T	I:Chrna7	Chrna7	T	C	C	C	T	C	C	C	C	C	C	C	C
7	63198635	rs50607861	A/G	I:Chrna7	Chrna7	A	G	G	G	A	G	G	G	G	G	G	G	G
7	63198639	rs47303253	C/T	I:Chrna7	Chrna7	T	C	C	C	T	C	C	C	C	C	C	C	C
7	63198710	rs51036353	A/G	I:Chrna7	Chrna7	G	A	A	A	G	A	A	A	A	A	A	A	A
7	63198755	rs46447880	C/T	I:Chrna7	Chrna7	T	C	C	C	T	C	C	C	C	C	C	C	C
7	63198762	rs51331075	A/G	I:Chrna7	Chrna7	A	G	G	G	A	G	G	G	G	G	G	G	G
7	63198832	rs49731873	A/C	I:Chrna7	Chrna7	C	A	A	A	C	A	A	A	A	A	A	A	A
7	63198847	rs217588294	A/G	I:Chrna7	Chrna7	G	A	A	A	G	A	A	A	A	A	A	A	A
7	63198866	rs49965484	A/G	I:Chrna7	Chrna7	A	G	G	G	A	G	G	G	G	G	G	G	G
7	63198918	rs48772599	C/T	I:Chrna7	Chrna7	T	C	C	C	T	C	C	C	C	C	C	C	C
7	63198966	rs48196146	A/G	I:Chrna7	Chrna7	G	A	A	A	G	A	A	A	A	A	A	A	A
7	63199006		indel		Chrna7	1	0
7	63199159	rs45957418	A/C	I:Chrna7	Chrna7	C	A	A	A	C	A	A	A	A	A	A	A	A
7	63199167	rs221932436	G/T	I:Chrna7	Chrna7	T	G	G	G	T	G	G	G	G	G	G	G	G
7	63199175	rs51654399	G/T	I:Chrna7	Chrna7	T	G	G	G	T	G	G	G	G	G	G	G	G
7	63199461	rs239877778	C/G	I:Chrna7	Chrna7	G	C	C	C	G	C	C	C	C	C	C	C	C
7	63199528	rs238681311	indel	I:Chrna7	Chrna7	1	0			1
7	63199536		indel		Chrna7		0				1		1					1
7	63199691	rs33902789	A/T	I:Chrna7	Chrna7	T	A	A	A	T	A	A	A	A	A	A	A	A
7	63199885	rs49539738	C/T	I:Chrna7	Chrna7	T	C	C	C	T	C	C	C	C	C	C	C	C
7	63199888	rs51833331	C/T	I:Chrna7	Chrna7	C	T	T	T	C	T	T	T	T	T	T	T	T
7	63199962	rs50267228	C/T	I:Chrna7	Chrna7	T	C	C	C	T	C	C	C	C	C	C	C	C
7	63200001	rs108271222	A/T	I:Chrna7	Chrna7	A	T	T	T	A	T	T	T	T	T	T	T	T
7	63200039	rs108623737	A/G	I:Chrna7	Chrna7	A	G	G	G	A	G	G	G	G	G	G	G	G
7	63200051	rs108813103	A/G	I:Chrna7	Chrna7	G	A	A	A	G	A	A	A	A	A	A	A	A
7	63200099	rs107806715	A/G	I:Chrna7	Chrna7	G	A	A	A	G	A	A	A	A	A	A	A	A
7	63200109	rs108617219	C/T	I:Chrna7	Chrna7	T	C	C	C	T	C	C	C	C	C	C	C	C
7	63200213	rs47857041	A/C	I:Chrna7	Chrna7	C	A	A	A	C	A	A	A	A	A	A	A	A
7	63200223	rs51845986	C/T	I:Chrna7	Chrna7	C	T	T	T	C	T	T	T	T	T	T	T	T
7	63200236	rs50439882	A/C	I:Chrna7	Chrna7	A	C	C	C	A	C	C	C	C	C	C	C	C
7	63200261	rs45682687	A/G	I:Chrna7	Chrna7	G	A	A	A	G	A	A	A	A	A	A	A	A
7	63200273	rs50303265	C/T	I:Chrna7	Chrna7	C	T	T	T	C	T	T	T	T	T	T	T	T
7	63200392	rs232028076	indel	I:Chrna7	Chrna7	1	0			1
7	63200403	rs213394704	C/T	I:Chrna7	Chrna7	T	C	C	C	T	C	C	C	C	C	C	C	C
7	63200412	rs46834049	A/G	I:Chrna7	Chrna7	G	A	A	A	G	A	A	A	A	A	A	A	A
7	63200433	rs107753641	C/T	I:Chrna7	Chrna7	T	C	C	C	T	C	C	C	C	C	C	C	C
7	63200477	rs108728063	A/G	I:Chrna7	Chrna7	G	A	A	A	G	A	A	A	A	A	A	A	A
7	63200545	rs51768858	C/T	I:Chrna7	Chrna7	C	T	T	T	C	T	T	T	T	T	T	T	T
7	63200562	rs48178514	A/G	I:Chrna7	Chrna7	G	A	A	A	G	A	A	A	A	A	A	A	A
7	63200586	rs50178600	C/T	I:Chrna7	Chrna7	T	C	C	C	T	C	C	C	C	C	C	C	C
7	63200595	rs46864192	A/G	I:Chrna7	Chrna7	A	G	G	G	A	G	G	G	G	G	G	G	G
7	63200654	rs45735016	A/G	I:Chrna7	Chrna7	G	A	A	A	G	A	A	A	A	A	A	A	A
7	63200659	rs51262551	C/T	I:Chrna7	Chrna7	C	T	T	T	C	T	T	T	T	T	T	T	T
7	63200736	rs45672455	A/G	I:Chrna7	Chrna7	A	G	G	G	A	G	G	G	G	G	G	G	G
7	63200737	rs49018535	A/G	I:Chrna7	Chrna7	A	G	G	G	A	G	G	G	G	G	G	G	G
7	63200799	rs48568155	A/G	I:Chrna7	Chrna7	G	A	A	A	G	A	A	A	A	A	A	A	A
7	63200977	rs51708309	G/T	I:Chrna7	Chrna7	G	T	T	T	G	T	T	T	T	T	T	T	T
7	63201140	rs50495389	A/C	I:Chrna7	Chrna7	C	A	A	A	C	A	A	A	A	A	A	A	A
7	63201281	rs50397687	C/T	I:Chrna7	Chrna7	T	C	C	C	T	C	C	C	C	C	C	C	C
7	63201325	rs46237138	A/C	I:Chrna7	Chrna7	C	A	A	A	C	A	A	A	A	A	A	A	A
7	63201363	rs52048828	A/C	I:Chrna7	Chrna7	C	A	A	A	C	A	A	A	A	A	A	A	A
7	63201367	rs47998115	C/T	I:Chrna7	Chrna7	T	C	C	C	T	C	C	C	C	C	C	C	C
7	63201386	rs47675932	C/T	I:Chrna7	Chrna7	T	C	C	C	T	C	C	C	C	C	C	C	C
7	63201687	rs31268361	A/G	I:Chrna7	Chrna7	A	G	G	G	A	G	G	G	G	G	G	G	G
7	63201770	rs32102382	C/G	I:Chrna7	Chrna7	G	C	C	C	G	C	C	C	C	C	C	C	C
7	63201790	rs31852181	A/G	I:Chrna7	Chrna7	G	A	A	A	G	A	A	A	A	A	A	A	A
7	63201828	rs31830612	A/G	I:Chrna7	Chrna7	A	G	G	G	A	G	G	G	G	G	G	G	G
7	63201890	rs31085928	A/G	I:Chrna7	Chrna7	G	A	A	A	G	A	A	A	A	A	A	A	A
7	63201904	rs217866821	indel	I:Chrna7	Chrna7	1	0			1
7	63202029	rs31650327	C/T	I:Chrna7	Chrna7	T	C	C	C	T	C	C	C	C	C	C	C	C
7	63202255	rs32468456	A/G	I:Chrna7	Chrna7	A	G	G	G	A	G	G	G	G	G	G	G	G
7	63202531	rs32232927	A/G	I:Chrna7	Chrna7	A	G	G	G	A	G	G	G	G	G	G	G	G
7	63202538	rs32176138	A/G	I:Chrna7	Chrna7	A	G	G	G	A	G	G	G	G	G	G	G	G
7	63202766	rs51935687	G/T	I:Chrna7	Chrna7	T	G	G	G	T	G	G	G	G	G	G	G	G
7	63202794	rs31579504	A/G	I:Chrna7	Chrna7	G	A	A	A	G	A	A	A	A	A	A	A	A
7	63202822	rs49849859	A/G	I:Chrna7	Chrna7	A	G	G	G	A	G	G	G	G	G	G	G	G
7	63202982		indel		Chrna7	1	0			1
7	63202987	rs52279885	A/G	I:Chrna7	Chrna7	A	G	G	G	A	G	G	G	G	G	G	G	G
7	63202997	rs52114090	A/G	I:Chrna7	Chrna7	G	A	A	A	A	A	A	A	A	A	A	A	A
7	63203022	rs237068418	indel	I:Chrna7	Chrna7		0	1			1		1
7	63203027	rs217848516	indel	I:Chrna7	Chrna7		0			1
7	63203084	rs231053058	indel	I:Chrna7	Chrna7	1	0			1
7	63203277	rs235251908	A/G	I:Chrna7	Chrna7	G	A	A	A	G	A	A	A	A	A	A	A	A
7	63203278	rs251349927	A/G	I:Chrna7	Chrna7	A	G	G	G	A	G	G	G	G	G	G	G	G
7	63203370	rs216857393	C/T	I:Chrna7	Chrna7	T	C	C	C	T	C	C	C	C	C	C	C	C
7	63203386	rs238317540	A/G	I:Chrna7	Chrna7	G	A	A	A	G	A	A	A	A	A	A	A	A
7	63203522	rs214671257	indel	I:Chrna7	Chrna7	1	0			1
7	63203531	rs583825326	C/T	I:Chrna7	Chrna7	T	C	C	C	T	C	C	C	C	C	C	C	C
7	63203567	rs52500067	C/T	I:Chrna7	Chrna7	T	C	C	C	T	C	C	C	C	C	C	C	C
7	63203602	rs46192951	C/T	I:Chrna7	Chrna7	T	C	C	C	T	C	C	C	C	C	C	C	C
7	63203621	rs52119108	A/G/T	I:Chrna7	Chrna7	A	G	G	G	A	G	G	G	G	G	G	G	G
7	63203686	rs52210054	A/G	I:Chrna7	Chrna7	G	A	A	A	G	A	A	A	A	A	A	A	A
7	63203756	rs52501685	G/T	I:Chrna7	Chrna7	T	G	G	G	T	G	G	G	G	G	G	G	G
7	63203814	rs215347626	C/T	I:Chrna7	Chrna7	C	T	T	T	C	T	T	T	T	T	T	T	T
7	63203894	rs48747868	A/G	I:Chrna7	Chrna7	A	G	G	G	A	G	G	G	G	G	G	G	G
7	63203976		indel		Chrna7	1	0			1
7	63204007	rs49730630	C/T	I:Chrna7	Chrna7	T	C	C	C	T	C	C	C	C	C	C	C	C
7	63204045		indel		Chrna7	1	0			1
7	63204190		indel		Chrna7	1	0			1
7	63204244	rs248383456	indel	I:Chrna7	Chrna7	1	0			1
7	63204333	rs49617249	A/G	I:Chrna7	Chrna7	G	A	A	A	G	A	A	A	A	A	A	A	A
7	63204337	rs51414395	A/G	I:Chrna7	Chrna7	A	G	G	G	A	G	G	G	G	G	G	G	G
7	63204487	rs241171073	A/G	I:Chrna7	Chrna7	G	A	A	A	G	A	A	A	A	A	A	A	A
7	63204628	rs257113237	A/T	I:Chrna7	Chrna7	A	T	T	T	A	T	T	T	T	T	T	T	T
7	63204672	rs48477093	A/T	I:Chrna7	Chrna7	A	T	T	T	A	T	T	T	T	T	T	T	T
7	63204750	rs52123339	C/T	I:Chrna7	Chrna7	T	C	C	C	T	C	C	C	C	C	C	C	C
7	63204755		indel		Chrna7	1	0			1
7	63204761	rs582339102	A/G	I:Chrna7	Chrna7		A	A	A	G	A	A	A	A	A	A	A	A
7	63204803		indel		Chrna7		0				1	2						2
7	63204833	rs246968684	indel	I:Chrna7	Chrna7	1	0			1
7	63204946	rs31701601	C/T	I:Chrna7	Chrna7	C	T	T	T	C	T	T	T	T	T	T	T	T
7	63205020	rs31830831	C/T	I:Chrna7	Chrna7	C	T	T	T	C	T	T	T	T	T	T	T	T
7	63205039	rs31034953	C/T	I:Chrna7	Chrna7	T	C	C	C	T	C	C	C	C	C	C	C	C
7	63205308	rs31503950	A/G	I:Chrna7	Chrna7	G	A	A	A	G	A	A	A	A	A	A	A	A
7	63205669	rs220910102	indel	I:Chrna7	Chrna7	1	0			1
7	63205744	rs108017869	A/G	I:Chrna7	Chrna7	G	A	A	A	G	A	A	A	A	A	A	A	A
7	63205758	rs241967443	indel	I:Chrna7	Chrna7	1	0			1
7	63205881	rs108897796	C/G	I:Chrna7	Chrna7	C	G	G	G	C	G	G	G	G	G	G	G	G
7	63205938	rs108883398	A/G	I:Chrna7	Chrna7	G	A	A	A	G	A	A	A	A	A	A	A	A
7	63205947	rs108168375	C/T	I:Chrna7	Chrna7	T	C	C	C	T	C	C	C	C	C	C	C	C
7	63205962	rs107819468	C/T	I:Chrna7	Chrna7	C	T	T	T	C	T	T	T	T	T	T	T	T
7	63206039	rs108169054	A/G	I:Chrna7	Chrna7	A	G	G	G	A	G	G	G	G	G	G	G	G
7	63206046	rs108129315	A/G	I:Chrna7	Chrna7	G	A	A	A	G	A	A	A	A	A	A	A	A
7	63206048	rs47482246	A/T	I:Chrna7	Chrna7	A	T	T	T	A	T	T	T	T	T	T	T	T
7	63206182	rs51613402	A/C	I:Chrna7	Chrna7	A	C	C	C	A	C	C	C	C	C	C	C	C
7	63206216	rs46087353	G/T	I:Chrna7	Chrna7	G	T	T	T	G	T	T	T	T	T	T	T	T
7	63206250	rs49476818	G/T	I:Chrna7	Chrna7	G	T	T	T	G	T	T	T	T	T	T	T	T
7	63206339		indel		Chrna7	1	0			1
7	63206367	rs51817643	A/T	I:Chrna7	Chrna7	T	A	A	A	T	A	A	A	A	A	A	A	A
7	63206527	rs52413164	C/T	I:Chrna7	Chrna7	T	C	C	C	T	C	C	C	C	C	C	C	C
7	63206534	rs52159595	A/C	I:Chrna7	Chrna7	A	C	C	C	A	C	C	C	C	C	C	C	C
7	63206561	rs47248944	C/T	I:Chrna7	Chrna7	C	T	T	T	C	T	T	T	T	T	T	T	T
7	63206584	rs46069950	C/T	I:Chrna7	Chrna7	T	C	C	C	T	C	C	C	C	C	C	C	C
7	63207114	rs226788067	indel	I:Chrna7	Chrna7	1	0			1
7	63207282	rs32251518	A/G	I:Chrna7	Chrna7	A	G	G	G	A	G	G	G	G	G	G	G	G
7	63207290	rs31051462	C/T	I:Chrna7	Chrna7	T	C	C	C	T	C	C	C	C	C	C	C	C
7	63207302	rs258639013	indel	I:Chrna7	Chrna7	1	0			1
7	63207665	rs31514425	C/T	I:Chrna7	Chrna7	T	C	C	C	T	C	C	C	C	C	C	C	C
7	63207699	rs263702437	indel	I:Chrna7	Chrna7	1	0			1
7	63207773	rs232520454	C/T	I:Chrna7	Chrna7	C	T	T	T	C	T	T	T	T	T	T	T	T
7	63208240	rs45904544	A/G	I:Chrna7	Chrna7	G	A	A	A	G	A	A	A	A	A	A	A	A
7	63208477	rs222173052	C/T	I:Chrna7	Chrna7	T	C	C	C	T	C	C	C	C	C	C	C	C
7	63208871	rs218909970	indel	I:Chrna7	Chrna7	1	0			1
7	63208876				Chrna7	C	G	G	G	C	G	G	G	G	G	G	G	G
7	63209076	rs48770839	C/T	I:Chrna7	Chrna7	C	T	T	T	C	T	T	T	T	T	T	T	T
7	63209205	rs241026882	A/T	I:Chrna7	Chrna7	A	T	T	T	A	T	T	T	T	T	T	T	T
7	63209225	rs257121066	C/T	I:Chrna7	Chrna7	C	T	T	T	C	T	T	T	T	T	T	T	T
7	63209374	rs248580904	A/G	I:Chrna7	Chrna7	A	G	G	G	A	G	G	G	G	G	G	G	G
7	63209466	rs6229707	A/G	I:Chrna7	Chrna7	A	G	G	G	A	G	G	G	G	G	G	G	G
7	63209550	rs6230232	C/T	I:Chrna7	Chrna7	C	T	T	T	C	T	T	T	T	T	T	T	T
7	63209635	rs6230405	C/T	I:Chrna7	Chrna7	T	C	C	C	T	C	C	C	C	C	C	C	C
7	63209647	rs6230862	C/G/T	I:Chrna7	Chrna7	T	C	C	C	T	C	C	C	C	C	C	C	C
7	63209648	rs6230863	C/T	I:Chrna7	Chrna7	C	T	T	T	C	T	T	T	T	T	T	T	T
7	63209681	rs6230914	C/T	I:Chrna7	Chrna7	C	T	T	T	C	T	T	T	T	T	T	T	T
7	63209706	rs6230957	C/T	I:Chrna7	Chrna7		C	C	C	T	C	C	C	C	C	C	C	C
7	63209846	rs6244400	C/T	I:Chrna7	Chrna7	T	C	C	C	T	C	C	C	C	C	C	C	C
7	63210100	rs6245624	C/T	I:Chrna7	Chrna7	T	C	C	C	T	C	C	C	C	C	C	C	C
7	63210248	rs47426734	C/T	I:Chrna7	Chrna7	C	T	T	T	C	T	T	T	T	T	T	T	T
7	63210253	rs51353437	A/G	I:Chrna7	Chrna7	G	A	A	A	G	A	A	A	A	A	A	A	A
7	63210278	rs50813661	C/G	I:Chrna7	Chrna7	C	G	G	G	C	G	G	G	G	G	G	G	G
7	63210293	rs49731270	A/C	I:Chrna7	Chrna7	C	A	A	A	C	A	A	A	A	A	A	A	A
7	63210337	rs251994216	indel	I:Chrna7	Chrna7	1	0			1
7	63210391	rs236824030	C/T	I:Chrna7	Chrna7	T	C	C	C	T	C	C	C	C	C	C	C	C
7	63210396	rs246176768	indel	I:Chrna7	Chrna7	1	0			1
7	63210697	rs107784947	G/T	I:Chrna7	Chrna7	T	G	G	G	T	G	G	G	G	G	G	G	G
7	63210718	rs249329446	C/T	I:Chrna7	Chrna7	C	T	T	T	C	T	T	T	T	T	T	T	T
7	63210804	rs234330266	indel	I:Chrna7	Chrna7	1	0			1
7	63210979	rs264659921	indel	I:Chrna7	Chrna7	1	0			1
7	63211210	rs264518522	indel	I:Chrna7	Chrna7		0				1		1
7	63211434	rs50441182	C/T	I:Chrna7	Chrna7	C	T	T	T	C	T	T	T	T	T	T	T	T
7	63211461	rs47579638	C/T	I:Chrna7	Chrna7	C	T	T	T	C	T	T	T	T	T	T	T	T
7	63211480	rs46075970	A/C	I:Chrna7	Chrna7	C	A	A	A	C	A	A	A	A	A	A	A	A
7	63211547	rs47139957	A/G	I:Chrna7	Chrna7	G	A	A	A	G	A	A	A	A	A	A	A	A
7	63211567	rs49795945	A/G	I:Chrna7	Chrna7	G	A	A	A	G	A	A	A	A	A	A	A	A
7	63211606	rs232586904	indel	I:Chrna7	Chrna7	1	0			1
7	63211634		indel		Chrna7	1	0
7	63211658	rs51621474	A/G	I:Chrna7	Chrna7	G	A	A	A	G	A	A	A	A	A	A	A	A
7	63211701	rs51733608	A/C	I:Chrna7	Chrna7	A	C	C	C	A	C	C	C	C	C	C	C	C
7	63211702	rs50611985	A/G	I:Chrna7	Chrna7	G	A	A	A	G	A	A	A	A	A	A	A	A
7	63211711	rs45823046	C/G	I:Chrna7	Chrna7	C	G	G	G	C	G	G	G	G	G	G	G	G
7	63211740	rs231031727	C/T	I:Chrna7	Chrna7	T	C	C	C	T	C	C	C	C	C	C	C	C
7	63211817	rs45914234	C/T	I:Chrna7	Chrna7	T	C	C	C	T	C	C	C	C	C	C	C	C
7	63212296	rs217839216	G/T	I:Chrna7	Chrna7	T	G	G	G	T	G	G	G	G	G	G	G	G
7	63212351	rs265917494	C/T	I:Chrna7	Chrna7	T	C	C	C	T	C	C	C	C	C	C	C	C
7	63212488	rs233853656	A/C	U5:Chrna7	Chrna7		A	A	A	C	A	A	A	A	A	A	A	A
7	63212496	rs52389090	C/T	U5:Chrna7	Chrna7		T	T	T	C	T	T	T	T	T	T	T	T

## Sheet: Chrna3
chr	bp38	rs	observed	dbsnp142annot	requested	DBA/1J	C57BL/6J	LP/J	BALB/cJ	DBA/2J	129S1/SvImJ	CBA/J	C3H/HeJ	A/J	AKR/J	FVB/NJ	BTBR T<+> Itpr3<tf>/J	NZB/BlNJ
9	55010453	rs33673155	C/T		Chrna3	T	C	T	C	T	T	T	C	C	C	C	T	C
9	55010729	rs30038867	A/C		Chrna3	C	A	C	A	C	C	C	A	A	A	A	C	A
9	55011580	rs33749942	C/T	U3:Chrna3	Chrna3	T	C	T	C	T	T	T	C	C	C	C	T	C
9	55011582	rs248357926	indel	Xi:Chrna3	Chrna3	1	0	1		1	1	1					1
9	55012018	rs30334703	A/T	U3:Chrna3	Chrna3	A	T	A	T	A	A	A	T	T	T	T	A	T
9	55012371	rs30078343	A/G	U3:Chrna3	Chrna3	A	G	A	G	A	A	A	G	G	G	G	A	G
9	55012527	rs30139373	A/C/T	U3:Chrna3	Chrna3	C	T	C	T	C	C	C	T	T	T	T	C	T
9	55012647	rs29939651	C/T	U3:Chrna3	Chrna3	T	C	T	C	T	T	T	C	C	C	C	T	C
9	55012652	rs237729042	indel	U3:Chrna3	Chrna3	1	0	1		1	1	1					1
9	55013227	rs239659094	indel	I:Chrna3	Chrna3	1	0	1		1	1	1					1
9	55013289	rs29831809	A/G	I:Chrna3	Chrna3	G	A	G	A	G	G	G	A	A	A	A	G	A
9	55013337	rs33639246	A/G	I:Chrna3	Chrna3	A	G	A	G	A	A	A	G	G	G	G	A	G
9	55013612	rs29994420	A/G	I:Chrna3	Chrna3	G	A	G	A	G	G	G	A	A	A	A	G	A
9	55013638	rs29930939	C/T	I:Chrna3	Chrna3	T	C	T	C	T	T	T	C	C	C	C	T	C
9	55013639	rs30241096	A/G	I:Chrna3	Chrna3	A	G	A	G	A	A	A	G	G	G	G	A	G
9	55014282	rs29930864	C/T	I:Chrna3	Chrna3	C	T	C	T	C	C	C	T	T	T	T	C	T
9	55015064	rs6183812	A/C	I:Chrna3	Chrna3	C	A	C	A	C	C	C	A	A	A	A	C	A
9	55016218	rs227851988	indel	I:Chrna3	Chrna3	1	0	1		1	1	1					1
9	55016663	rs46711845	C/T	I:Chrna3	Chrna3	C	T	C	T	C	C	C	T	T	T	T	C	T
9	55016759	rs248292588	A/C	I:Chrna3	Chrna3	A	A	A	A	C	A	T	A	A	A	A	T	A
9	55016760	rs230304877	indel	I:Chrna3	Chrna3		0					1					1
9	55016810	rs30128449	C/T	I:Chrna3	Chrna3	T	C	T	C	T	T	T	C	C	C	C	T	C
9	55016818	rs257373045	indel	I:Chrna3	Chrna3	1	0	1		1	1	1					1
9	55016941	rs48384741	A/T	I:Chrna3	Chrna3	T	A	T	A	T	T	T	A	A	A	A	T	A
9	55017111	rs224302099	C/T	I:Chrna3	Chrna3	C	T	C	T	C	C	C	T	T	T	T	C	T
9	55017130	rs244583737	C/T	I:Chrna3	Chrna3	C	T	C	T	C	C	C	T	T	T	T	C	T
9	55017158	rs259162909	C/T	I:Chrna3	Chrna3	T	C	T	C	T	T	C	C	C	C	C	C	C
9	55017563	rs264450481	indel	I:Chrna3	Chrna3	1	0	1		1	1	1					1
9	55017644		indel		Chrna3		0					1					1
9	55017648	rs253226492	C/T	I:Chrna3	Chrna3	C	T	C	T	C	C		T	T	T	T		T
9	55017668		indel		Chrna3	1	0	1			1	1
9	55017674	rs258961991	indel	I:Chrna3	Chrna3		0			1
9	55017686	rs386921279	C/T	I:Chrna3	Chrna3	T	T	T	T	T	T	T	T	T	T	C	T	T
9	55017708	rs581441123	C/T	I:Chrna3	Chrna3	C	C	T	C			T	C	C	C	C		C
9	55017743	rs266090396	indel	I:Chrna3	Chrna3	1	0	1		1	1	1					1
9	55017748	rs217175759	C/G	I:Chrna3	Chrna3	C	G	C	G	C	C	C	G	G	G	G	C	G
9	55017871	rs266024265	A/G	I:Chrna3	Chrna3	G	A	G	A	G	G	G	A	A	A	A	G	A
9	55017896	rs234271791	C/T	I:Chrna3	Chrna3	C	T	C	T	C	C	C	T	T	T	T	C	T
9	55018005	rs29993174	A/G	I:Chrna3	Chrna3	A	G	A	G	A	A	A	G	G	G	G	A	G
9	55018017	rs30179604	A/G	I:Chrna3	Chrna3	A	G	A	G	A	A	A	G	G	G	G	A	G
9	55018064	rs237745665	C/T	I:Chrna3	Chrna3	C	T	C	T	C	C	C	T	T	T	T	C	T
9	55018068	rs244381352	A/G	I:Chrna3	Chrna3	G	A	G	A	G	G	G	A	A	A	A	G	A
9	55018658	rs237696820	C/T	I:Chrna3	Chrna3	C	T	C	T	C	C	C	T	T	T	T	C	T
9	55018923	rs259077468	A/G	I:Chrna3	Chrna3	G	A	G	A		G	G	A	A	A	A		A
9	55019038	rs223727143	A/G	I:Chrna3	Chrna3	G	A	G	A	G	G	G	A	A	A	A		A
9	55019155	rs52194092	G/T	I:Chrna3	Chrna3	T	G	T	G	T	T	T	G	G	G	G	T	G
9	55019474	rs30282132	A/T	I:Chrna3	Chrna3	A	T	A	T	A	A	A	T	T	T	T	A	T
9	55019493	rs29642170	C/T	I:Chrna3	Chrna3	C	T	C	T	C	C	C	T	T	T	T	C	T
9	55019495	rs30091570	A/G	I:Chrna3	Chrna3	A	G	A	G	A	A	A	G	G	G	G	A	G
9	55019497	rs33699147	A/G	I:Chrna3	Chrna3	G	A	G	A	G	G	G	A	A	A	A	G	A
9	55019704	rs33619413	A/G	I:Chrna3	Chrna3	G	A	G	A	G	G	G	A	A	A	A	G	A
9	55020137	rs217045591	indel	I:Chrna3	Chrna3		0					2				2	2
9	55020402	rs33664032	C/T	I:Chrna3	Chrna3	C	T	C	T	C	C	C	T	T	T	C	C	T
9	55020738	rs29791534	A/G	I:Chrna3	Chrna3	A	G	A	G	A	A	G	G	G	G	G	G	G
9	55021221	rs6181150	C/T	I:Chrna3	Chrna3	C	T	C	T	C	C	C	T	T	T	T	C	T
9	55021720	rs30221416	A/C/T	I:Chrna3	Chrna3	A	T	A	T	A	A	A	T	T	T	T	A	T
9	55022336	rs231767656	indel	I:Chrna3	Chrna3	1	0	1		1	1	1					1
9	55022943	rs30333055	C/T	I:Chrna3	Chrna3	C	T	C	T	C	C	C	T	T	T	T	C	T
9	55023052	rs240375204	indel	I:Chrna3	Chrna3	1	0	1		1	1
9	55023267	rs30237194	A/C	I:Chrna3	Chrna3	A	C	A	C	A	A	A	C	C	C	C	A	C
9	55023753	rs239038171	G/T	I:Chrna3	Chrna3	G	T	G	T	G	G	G	T	T	T	T	G	T
9	55023779	rs263958154	indel	I:Chrna3	Chrna3	1	0	1		1	1	1
9	55023780	rs258511682	G/T	I:Chrna3	Chrna3		T	G	T			G	T	T	T	T	G	T
9	55023946	rs29994251	A/C	I:Chrna3	Chrna3	C	A	C	A	C	C	C	A	A	A	A	C	A
9	55023988	rs29937462	C/T	I:Chrna3	Chrna3	T	C	T	C	T	T	T	C	C	C	C	T	C
9	55025042	rs30475973	A/G	I:Chrna3	Chrna3	G	A	G	A	G	G	G	A	A	A	A	G	A
9	55025161	rs251116143	indel	I:Chrna3	Chrna3	1	0	1		1	1	1					1
9	55025650	rs30520458	C/T	I:Chrna3	Chrna3	C	T	C	T	C	C	C	T	T	T	T	C	T
9	55026123	rs108843075	C/G	I:Chrna3	Chrna3	C	G	C	G	C	C	G	G	G	G	G	G	G
9	55026134	rs30143283	A/G	I:Chrna3	Chrna3	A	G	A	G	A	A	G	G	G	G	G	G	G
9	55026503	rs30234574	A/G	U5:Chrna3	Chrna3	A	G	A	G	A	A	A	G	G	G	G	A	G

## Sheet: Chrna4
chr	bp38	rs	observed	dbsnp142annot	requested	DBA/1J	C57BL/6J	LP/J	BALB/cJ	DBA/2J	129S1/SvImJ	CBA/J	C3H/HeJ	A/J	AKR/J	FVB/NJ	BTBR T<+> Itpr3<tf>/J	NZB/BlNJ
2	181022391	rs29579134	A/G	U3:Chrna4	Chrna4	G	A	A	A	G	A	A	G	G	G	A	A	A
2	181022487	rs27680412	A/G	U3:Chrna4	Chrna4	G	G	G	A	G	G	G	G	G	G	G	G	G
2	181022622	rs27680411	C/T	U3:Chrna4	Chrna4	T	C	C	C	T	C	C	T	T	T	C	C	C
2	181022632	rs51195546	C/T	U3:Chrna4	Chrna4	T	C	C	C	T	C	C	T	T	T	C	C	C
2	181022633	rs253131236	A/G	U3:Chrna4	Chrna4	G	A	A	A	G	A	A	G	G	G	A	A	A
2	181022638	rs27680410	C/T	U3:Chrna4	Chrna4	C	T	T	C	C	T	T	C	C	C	T	T	T
2	181022658	rs27680409	C/T	U3:Chrna4	Chrna4	C	C	C	T	C	C	C	C	C	C	C	C	C
2	181022740	rs27680408	C/T	U3:Chrna4	Chrna4	C	C	C	T	C	C	C	C	C	C	C	C	C
2	181022741	rs32993796	A/G	U3:Chrna4	Chrna4	A	G	G	G	A	G	G	A	A	A	G	G	G
2	181022778	rs264610452	indel	U3:Chrna4	Chrna4	1	0			1			1	1	1
2	181022779	rs46349539	C/T	U3:Chrna4	Chrna4		T	T	C		T	T				T	T	T
2	181023127	rs27680406	A/T	U3:Chrna4	Chrna4	A	T	T	T	A	T	T	A	A	A	T	T	T
2	181023408	rs27680405	A/G	U3:Chrna4	Chrna4	A	G	G	G	A	G	G	A	A	A	G	G	G
2	181023439	rs246700461	indel	Xi:Chrna4	Chrna4	1	0			1			1	1	1
2	181023664	rs33521364	C/T	U3:Chrna4	Chrna4	T	C	C	C	T	C	C	T	T	T	C	C	C
2	181023683	rs27680404	G/T	U3:Chrna4	Chrna4	T	G	G	T	T	G	G	T	T	T	G	G	G
2	181023905	rs27680403	C/T	U3:Chrna4	Chrna4	C	T	T	T	C	T	T	C	C	C	T	T	T
2	181023933	rs27680402	C/T	U3:Chrna4	Chrna4	T	C	C	C	T	C	C	T	T	T	C	C	C
2	181024745	rs27680399	C/T	U3:Chrna4	Chrna4	T	C	C	C	T	C	C	T	T	T	C	C	C
2	181024835	rs27680398	G/T	Cs:Chrna4:I:603	Chrna4	T	G	G	G	T	G	G	T	T	T	G	G	G
2	181024904	rs27680397	C/T	I:Chrna4	Chrna4	T	C	C	T	T	C	C	T	T	T	C	C	C
2	181025467	rs29624242	C/T	I:Chrna4	Chrna4	C	T	T	C	C	T	T	C	C	C	T	T	T
2	181025651	rs27680391	C/G/T	I:Chrna4	Chrna4	C	T	T	C	C	T	T	C	C	C	T	T	T
2	181025718	rs29674369	C/G	I:Chrna4	Chrna4	G	C	C	C	G	C	C	G	G	G	C	C	C
2	181025727	rs33398038	A/C	I:Chrna4	Chrna4	A	C	C	C	A	C	C	A	A	A	C	C	C
2	181026186	rs27680385	C/T	I:Chrna4	Chrna4	T	C	C	C	T	C	C	T	T	T	C	C	C
2	181026239	rs237308886	indel	I:Chrna4	Chrna4	1	0			1			1	1	1
2	181026419	rs27680384	A/C	I:Chrna4	Chrna4	C	A	A	A	C	A	A	C	C	C	A	A	A
2	181026446	rs27680383	A/G	I:Chrna4	Chrna4	G	A	A	A	G	A	A	G	G	G	A	A	A
2	181026477	rs27680382	A/C	I:Chrna4	Chrna4	A	C	C	C	A	C	C	A	A	A	C	C	C
2	181026785	rs27680380	A/G	I:Chrna4	Chrna4	G	A	A	A	G	A	A	G	G	G	A	A	A
2	181026880	rs29675190	C/T	I:Chrna4	Chrna4	T	C	C	C	T	C	C	T	T	T	C	C	C
2	181026881	rs27680379	A/G	I:Chrna4	Chrna4	G	A	A	A	G	A	A	G	G	G	A	A	A
2	181027049	rs257910300	indel	I:Chrna4	Chrna4	1	0		1	1			1	1	1
2	181027093	rs29672505	A/C	I:Chrna4	Chrna4	A	C	C	C	A	C	C	A	A	A	C	C	C
2	181027219	rs27680377	C/T	I:Chrna4	Chrna4	C	T	T	T	C	T	T	C	C	C	T	T	T
2	181027249	rs27680376	A/C	I:Chrna4	Chrna4	C	A	A	A	C	A	A	C	C	C	A	A	A
2	181027254	rs246631268	indel	I:Chrna4	Chrna4	1	0			1			1	1	1
2	181027413	rs27680373	A/G	I:Chrna4	Chrna4	A	G	G	G	A	G	G	A	A	A	G	G	G
2	181027553	rs27680371	A/G	I:Chrna4	Chrna4	A	G	G	G	A	G	G	A	A	A	G	G	G
2	181027664	rs235393290	indel	I:Chrna4	Chrna4		0			1			1	1	1
2	181027759	rs27680369	C/T	I:Chrna4	Chrna4	C	T	T	T	C	T	T	C	C	C	T	T	T
2	181027928	rs27680367	A/G	I:Chrna4	Chrna4	A	G	G	G	A	G	G	A	A	A	G	G	G
2	181028171	rs212096914	indel	I:Chrna4	Chrna4	1	0			1			1	1	1
2	181028377	rs27680364	C/T	Cn:Chrna4:TA:529	Chrna4	C	T	T	T	C	T	T	C	C	C	T	T	T
2	181028414	rs27680363	C/T	Cs:Chrna4:L:516	Chrna4	T	C	C	C	T	C	C	T	T	T	C	C	C
2	181028609	rs3682046	A/G	Cs:Chrna4:S:451	Chrna4	G	A	A	A	G	A	A	G	G	G	A	A	A
2	181029566	rs27680358	A/G	Cs:Chrna4:D:132	Chrna4	G	G	G	A	G	G	G	G	G	G	G	G	G
2	181029630	rs235113386	A/G	I:Chrna4	Chrna4	G	G	G	A	G	G	G	G	G	G	G	G	G
2	181029846	rs29624485	C/T	I:Chrna4	Chrna4	T	C	C	T	T	C	C	T	T	T	C	C	C
2	181030738	rs253878814	C/G	I:Chrna4	Chrna4	G	G	G	C	G	G	G	G	G	G	G	G	G
2	181030853	rs212276480	C/T	I:Chrna4	Chrna4	T	T	T	C	T	T	T	T	T	T	T	T	T
2	181031551	rs263984986	A/G	I:Chrna4	Chrna4	G	G	G	A	G	G	G	G	G	G	G	G	G
2	181032699	rs234397876	A/G	I:Chrna4	Chrna4	A	A	A	G	A	A	A	A	A	A	A	A	A
2	181033858	rs33644919	A/G	I:Chrna4	Chrna4	A	G	G	G	A	G	G	A	A	A	G	G	G
2	181034093	rs259102424	indel	I:Chrna4	Chrna4		0	1	1		1	1				1		1
2	181034916	rs249537809	A/G	I:Chrna4	Chrna4	G	G	G	A	G	G	G	G	G	G	G	G	G
2	181035599	rs247487000	G/T	I:Chrna4	Chrna4	T	T	T	G	T	T	T	T	T	T	T	T	T
2	181035925	rs252537687	C/T	I:Chrna4	Chrna4	C	C	C	T	C	C	C	C	C	C	C	C	C
2	181036109	rs223768194	A/T	I:Chrna4	Chrna4	A	A	A	T	A	A	A	A	A	A	A	A	A
2	181036183	rs262162678	A/T	I:Chrna4	Chrna4	T	T	T	A	T	T	T	T	T	T	T	T	T
2	181036202	rs222244599	A/G	I:Chrna4	Chrna4	G	G	G	A	G	G	G	G	G	G	G	G	G
2	181036240	rs214857859	indel	I:Chrna4	Chrna4		0		1
2	181036275	rs257346616	A/G	I:Chrna4	Chrna4	A	A	A	G	A	A	A	A	A	A	A	A	A
2	181036531	rs250922418	C/T	I:Chrna4	Chrna4	C	C	C	T	C	C	C	C	C	C	C	C	C
2	181036699	rs33335937	G/T	I:Chrna4	Chrna4	T	G	G	G	T	G	G	T	T	T	G	G	G
2	181036733	rs215636718	G/T	I:Chrna4	Chrna4	G	G	G	T	G	G	G	G	G	G	G	G	G
2	181036760	rs29575879	C/T	I:Chrna4	Chrna4	C	T	T	C	C	T	T	C	C	C	T	T	T
2	181036788	rs234965861	G/T	I:Chrna4	Chrna4	G	G	G	T	G	G	G	G	G	G	G	G	G
2	181037253	rs256137728	indel	I:Chrna4	Chrna4		0		1
2	181037403	rs215839459	C/G	I:Chrna4	Chrna4	G	G	G	C	G	G	G	G	G	G	G	G	G
2	181037708	rs227430956	indel	I:Chrna4	Chrna4		0		1
2	181037769	rs260036350	C/T	I:Chrna4	Chrna4	C	C	C	T	C	C	C	C	C	C	C	C	C
2	181037846	rs253250757	indel	I:Chrna4	Chrna4		0		1
2	181037956	rs221668366	A/G	I:Chrna4	Chrna4	G	G	G	A	G	G	G	G	G	G	G	G	G
2	181037990	rs243253529	G/T	I:Chrna4	Chrna4	T	T	T	G	T	T	T	T	T	T	T	T	T
2	181038024	rs262504763	A/T	I:Chrna4	Chrna4	A	A	A	T	A	A	A	A	A	A	A	A	A
2	181038032	rs220504588	A/G	I:Chrna4	Chrna4	G	G	G	A	G	G	G	G	G	G	G	G	G
2	181038088	rs245278849	G/T	I:Chrna4	Chrna4	G	G	G	T	G	G	G	G	G	G	G	G	G
2	181038103	rs260741937	C/T	I:Chrna4	Chrna4	T	T	T	C	T	T	T	T	T	T	T	T	T
2	181038107	rs229118920	C/G	I:Chrna4	Chrna4	C	C	C	G	C	C	C	C	C	C	C	C	C
2	181038118	rs240370417	A/G	I:Chrna4	Chrna4	G	G	G	A	G	G	G	G	G	G	G	G	G
2	181038152	rs259914078	A/T	I:Chrna4	Chrna4	T	T	T	A	T	T	T	T	T	T	T	T	T
2	181038364	rs32953015	C/T	I:Chrna4	Chrna4	C	T	T	C	C	T	T	C	C	C	T	T	T
2	181038394	rs225275683	indel	I:Chrna4	Chrna4		0										1
2	181038395	rs33379971	C/T	I:Chrna4	Chrna4	T	C	C	C	T	C	C	T	T	T	C	C	C
2	181038448	rs29965623	C/T	I:Chrna4	Chrna4	T	C	C		T	C	C	T	T	T	C	C	C
2	181039058	rs245774393	A/G	Cn:Chrna4:SP:6 I:Chrna4	Chrna4	A	A	A	G	A	A	A	A	A	A	A	A	A
2	181039197	rs387288307	A/T	I:Chrna4	Chrna4	A	A	A	A	A	A	A	A	A	A	T	A	A
2	181039335	rs3704286	A/C	I:Chrna4	Chrna4	A	C	C	C	A	C	C	A	A	A	C	C	C
2	181039540	rs264565081	A/C	I:Chrna4	Chrna4	C	C	A	C	C	A	A	C	C	C	C	C	A
2	181040059	rs242581520	indel	I:Chrna4	Chrna4		0			1				0	1
2	181040059	rs264651447	C/G	I:Chrna4	Chrna4		C	C	G	C	C	C	C	C	C	C	C
2	181040420	rs212571280	A/C	I:Chrna4	Chrna4	C	C	C	A	C	C	C	C	C	C	C	C	C
2	181040468	rs248373924	C/T	I:Chrna4	Chrna4	T	T	T	C	T	T	T	T	T	T	T	T	T
2	181040469	rs217525248	G/T	I:Chrna4	Chrna4	G	G	G	T	G	G	G	G	G	G	G	G	G
2	181040572	rs222715755	A/G	I:Chrna4	Chrna4	A	A	A	G	A	A	A	A	A	A	A	A	A
2	181040654	rs238927194	A/G	I:Chrna4	Chrna4	G	G	G	A	G	G	G	G	G	G	G	G	G
2	181040768	rs240848248	C/T	I:Chrna4	Chrna4	T	T	T	C	T	T	T	T	T	T	T	T	T
2	181040769	rs259795781	G/T	I:Chrna4	Chrna4	G	G	G	T	G	G	G	G	G	G	G	G	G
2	181040838	rs220459365	C/T	I:Chrna4	Chrna4	C	C	C	T	C	C	C	C	C	C	C	C	C
2	181040955	rs234439461	indel	I:Chrna4	Chrna4		0		1
2	181040980	rs239670940	C/T	I:Chrna4	Chrna4	C	C	C	T	C	C	C	C	C	C	C	C	C
2	181041045	rs230719401	C/T	I:Chrna4	Chrna4	C	C	C	T	C	C	C	C	C	C	C	C	C
2	181041071	rs252167599	C/T	I:Chrna4	Chrna4	T	T	T	C	T	T	T	T	T	T	T	T	T
2	181041319	rs217735782	A/T	I:Chrna4	Chrna4	A	A	A	T	A	A	A	A	A	A	A	A	A
2	181041387	rs253208662	A/G	I:Chrna4	Chrna4	G	G	G	A	G	G	G	G	G	G	G	G	G
2	181042326	rs27680349	A/C	I:Chrna4	Chrna4	C	A	A	A	C	A	A	C	C	C	A	A	A
2	181042549	rs27680347	A/G	I:Chrna4	Chrna4	G	A	A	A	G	A	A	G	G	G	A	A	A
2	181042712	rs260044894	indel	I:Chrna4	Chrna4	1	0			1			1	1	1
2	181042736	rs27680345	A/G	I:Chrna4	Chrna4	A	G	G	G	A	G	G	A	A	A	G	G	G
2	181042909	rs27680344	A/G	I:Chrna4	Chrna4	G	A	A	A	G	A	A	G	G	G	A	A	A
2	181042955	rs27680343	G/T	I:Chrna4	Chrna4	G	T	T	T	G	T	T	G	G	G	T	T	T
2	181043025	rs27680342	C/T	I:Chrna4	Chrna4	C	T	T	T	C	T	T	C	C	C	T	T	T
2	181043219	rs387594754	C/G	I:Chrna4	Chrna4	C	C	C	C	C	C	C	C	C	C	G	C	C
2	181043300	rs27680338	C/T	I:Chrna4	Chrna4	C	T	T	T	C	T	T	C	C	C	T	T	T
2	181043579	rs27680335	C/G	U5:Chrna4	Chrna4	G	C	C	C	G	C	C	G	G	G	C	C	C

## Sheet: Chrnb2
chr	bp38	rs	observed	dbsnp142annot	requested	DBA/1J	C57BL/6J	LP/J	BALB/cJ	DBA/2J	129S1/SvImJ	CBA/J	C3H/HeJ	A/J	AKR/J	FVB/NJ	BTBR T<+> Itpr3<tf>/J	NZB/BlNJ
3	89753936	rs13469417	A/T	I:Adar U3:Chrnb2	Chrnb2	A	T	T	A	A	T	T	T	T	T	T	T	A

## Sheet: Chrna1
chr	bp38	rs	observed	dbsnp142annot	requested	DBA/1J	C57BL/6J	LP/J	BALB/cJ	DBA/2J	129S1/SvImJ	CBA/J	C3H/HeJ	A/J	AKR/J	FVB/NJ	BTBR T<+> Itpr3<tf>/J	NZB/BlNJ
2	73563329	rs233002592	A/G	U3:Chrna1 I:Gm30940	Chrna1	A	A	A	A	A	A	A	A	A	A	A	A	G
2	73563330	rs255653000	G/T	U3:Chrna1 I:Gm30940	Chrna1	T	T	T	T	T	T	T	T	T	T	T	T	G
2	73563437	rs221064227	C/T	U3:Chrna1 I:Gm30940	Chrna1	C	C	C	C	C	C	C	C	C	C	C	C	T
2	73563454	rs240396480	A/G	U3:Chrna1 I:Gm30940	Chrna1	G	G	G	G	G	G	G	G	G	G	G	G	A
2	73563477	rs225797547	A/G	U3:Chrna1 I:Gm30940	Chrna1	G	G	G	G	G	G	G	G	G	G	G	G	A
2	73563481	rs243624324	C/T	U3:Chrna1 I:Gm30940	Chrna1	T	T	T	T	T	T	T	T	T	T	T	T	C
2	73563482	rs261804014	C/G	U3:Chrna1 I:Gm30940	Chrna1	G	G	G	G	G	G	G	G	G	G	G	G	C
2	73563498	rs233822491	C/T	U3:Chrna1 I:Gm30940	Chrna1	C	C	C	C	C	C	C	C	C	C	C	C	T
2	73563518	rs215045425	C/T	U3:Chrna1 I:Gm30940	Chrna1	C	C	C	C	C	C	C	C	C	C	C	C	T
2	73563536	rs582729222	C/T	U3:Chrna1 I:Gm30940	Chrna1	T	T	T	T	T	T	T	T	T	T	T	T	C
2	73563544	rs242217730	indel	U3:Chrna1 I:Gm30940	Chrna1		0											1
2	73563585	rs244978945	A/C	U3:Chrna1 I:Gm30940	Chrna1	C	C	C	C	C	C	C	C	C	C	C	C	A
2	73563681	rs260956109	A/G	U3:Chrna1 I:Gm30940	Chrna1	G	G	G	G	G	G	G	G	G	G	G	G	A
2	73563697	rs212980930	A/T	U3:Chrna1 I:Gm30940	Chrna1	T	T	T	T	T	T	T	T	T	T	T	T	A
2	73563704	rs261050113	A/G	U3:Chrna1 I:Gm30940	Chrna1	G	G	G	G	G	G	G	G	G	G	G	G	A
2	73563756	rs240348913	A/G	U3:Chrna1 I:Gm30940	Chrna1	A	A	A	A	A	A	A	A	A	A	A	A	G
2	73563820	rs221541044	A/G	U3:Chrna1 I:Gm30940	Chrna1	A	A	A	A	A	A	A	A	A	A	A	A	G
2	73563858	rs241824673	C/T	U3:Chrna1 I:Gm30940	Chrna1	T	T	T	T	T	T	T	T	T	T	T	T	C
2	73563905	rs232849684	C/T	U3:Chrna1 I:Gm30940	Chrna1	C	C	C	C	C	C	C	C	C	C	C	C	T
2	73563937	rs27954005	A/C	U3:Chrna1 I:Gm30940	Chrna1	A	A	A	A	A	A	A	A	A	A	A	A	C
2	73563981	rs227992331	C/T	U3:Chrna1 I:Gm30940	Chrna1	C	C	C	C	C	C	C	C	C	C	C	C	T
2	73564038	rs214329830	A/C	U3:Chrna1 I:Gm30940	Chrna1	C	C	C	C	C	C	C	C	C	C	C	C	A
2	73564130	rs249162058	C/G	U3:Chrna1 I:Gm30940	Chrna1	C	C	C	C	C	C	C	C	C	C	C	C	G
2	73564230	rs253344854	C/T	U3:Chrna1 I:Gm30940	Chrna1	C	C	C	C	C	C	C	C	C	C	C	C	T
2	73564241	rs215366164	A/C	U3:Chrna1 I:Gm30940	Chrna1	C	C	C	C	C	C	C	C	C	C	C	C	A
2	73564248	rs233774615	A/G	U3:Chrna1 I:Gm30940	Chrna1	A	A	A	A	A	A	A	A	A	A	A	A	G
2	73564282	rs220332748	A/G	U3:Chrna1 I:Gm30940	Chrna1	G	G	G	G	G	G	G	G	G	G	G	G	A
2	73564312	rs578944393	A/T	U3:Chrna1 I:Gm30940	Chrna1	A	A	A	A	A	A	A	A	A	A	A	A	T
2	73564553	rs256696215	C/T	U3:Chrna1 I:Gm30940	Chrna1	T	T	T	T	T	T	T	T	T	T	T	T	C
2	73564648	rs219667572	A/G	U3:Chrna1 I:Gm30940	Chrna1	A	A	A	A	A	A	A	A	A	A	A	A	G
2	73564749	rs580043592	A/C	U3:Chrna1 I:Gm30940	Chrna1	A	A	A	A	A	A	A	A	A	A	A	A	C
2	73564753	rs246107147	indel	U3:Chrna1 I:Gm30940	Chrna1		0											2
2	73564920	rs227543989	A/G	U3:Chrna1 I:Gm30940	Chrna1	G	G	G	G	G	G	G	G	G	G	G	G	A
2	73564965	rs264033522	A/G	U3:Chrna1 I:Gm30940	Chrna1	G	G	G	G	G	G	G	G	G	G	G	G	A
2	73564983	rs234117881	A/G	U3:Chrna1 I:Gm30940	Chrna1	A	A	A	A	A	A	A	A	A	A	A	A	G
2	73565026	rs247518186	C/T	U3:Chrna1 I:Gm30940	Chrna1	T	T	T	T	T	T	T	T	T	T	T	T	C
2	73565038	rs215328320	C/G	U3:Chrna1 I:Gm30940	Chrna1	G	G	G	G	G	G	G	G	G	G	G	G	C
2	73565217	rs244027491	A/G	U3:Chrna1 NC:Gm30940	Chrna1	A	A	A	A	A	A	A	A	A	A	A	A	G
2	73565227	rs215466984	A/G	U3:Chrna1 NC:Gm30940	Chrna1	A	A	A	A	A	A	A	A	A	A	A	A	G
2	73565269	rs234993800	A/G	U3:Chrna1 NC:Gm30940	Chrna1	A	A	A	A	A	A	A	A	A	A	A	A	G
2	73565279	rs261762466	A/G	U3:Chrna1 NC:Gm30940	Chrna1	A	A	A	A	A	A	A	A	A	A	A	A	G
2	73565404	rs236007559	C/T	U3:Chrna1	Chrna1	T	T	T	T	T	T	T	T	T	T	T	T	C
2	73565408	rs218833060	indel	U3:Chrna1	Chrna1		0											1
2	73565414	rs255115750	indel	U3:Chrna1	Chrna1		0								1
2	73565452	rs258954930	indel	U3:Chrna1	Chrna1		0		1									2
2	73565515		indel		Chrna1		0											1
2	73565538	rs221550489	A/T	U3:Chrna1	Chrna1	A	A	A	A	A	A	A	A	A	A	A	A	T
2	73565615	rs258151522	A/C/G	U3:Chrna1	Chrna1	C	C	C	C	C	C	C	C	C	C	C	C	G
2	73565684	rs242093627	C/T	U3:Chrna1	Chrna1	T	T	T	T	T	T	T	T	T	T	T	T	C
2	73565927	rs257293920	A/G	U3:Chrna1	Chrna1	G	G	G	G	G	G	G	G	G	G	G	G	A
2	73565955	rs215002433	A/G	U3:Chrna1	Chrna1	G	G	G	G	G	G	G	G	G	G	G	G	A
2	73565968	rs236543797	A/G	U3:Chrna1	Chrna1	G	G	G	G	G	G	G	G	G	G	G	G	A
2	73565973	rs250165719	C/T	U3:Chrna1	Chrna1	T	T	T	T	T	T	T	T	T	T	T	T	C
2	73566269	rs27954004	A/G	Cs:Chrna1:D:427	Chrna1	A	A	A	A	A	A	A	A	A	A	A	A	G
2	73566580	rs27954001	A/G	I:Chrna1	Chrna1	G	G	G	G	G	G	G	G	G	G	G	G	A
2	73566591	rs258124069	C/T	I:Chrna1	Chrna1	T	T	T	T	T	T	T	T	T	T	T	T	C
2	73566652	rs226096782	indel	I:Chrna1	Chrna1		0											1
2	73566702	rs27954000	A/G	Cs:Chrna1:N:414	Chrna1	G	G	G	G	G	G	G	G	G	G	G	G	A
2	73567207	rs27953996	G/T	I:Chrna1	Chrna1	G	G	G	G	G	G	G	G	G	G	G	G	T
2	73567453	rs27953990	A/G	I:Chrna1	Chrna1	A	A	A	A	A	A	A	A	A	A	A	A	G
2	73567683	rs231726701	indel	I:Chrna1	Chrna1		0											1
2	73567751	rs265983907	A/G	I:Chrna1	Chrna1	A	A	A	A	A	A	A	A	A	A	A	A	G
2	73567755	rs27953989	C/T	I:Chrna1	Chrna1	T	T	T	T	T	T	T	T	T	T	T	T	C
2	73567771	rs245288593	indel	I:Chrna1	Chrna1		0								1
2	73567787	rs246783438	C/G	I:Chrna1	Chrna1	G	G	G	G	G	G	G	G	G	G	G	G	C
2	73567789	rs216260365	C/T	I:Chrna1	Chrna1	T	T	T	T	T	T	T	T	T	T	T	T	C
2	73567933	rs27953988	A/G	I:Chrna1	Chrna1	A	A	A	A	A	A	A	A	A	A	A	A	G
2	73567970	rs27953986	A/G	I:Chrna1	Chrna1	G	G	G	G	G	G	G	G	G	G	G	G	A
2	73568212	rs27953985	A/G	Cs:Chrna1:I:294	Chrna1	G	G	G	G	G	G	G	G	G	G	G	G	A
2	73568242	rs236956694	A/G	Cs:Chrna1:I:284	Chrna1	G	G	G	G	G	G	G	G	G	G	G	G	A
2	73568245	rs27953984	C/T	Cs:Chrna1:L:283	Chrna1	T	T	T	T	T	T	T	T	T	T	T	T	C
2	73568361	rs245158177	A/G	I:Chrna1	Chrna1	A	A	A	A	A	A	A	A	A	A	A	A	G
2	73568585	rs240753122	C/T	I:Chrna1	Chrna1	C	C	C	C	C	C	C	C	C	C	C	C	T
2	73568630	rs27953983	A/G	I:Chrna1	Chrna1	G	G	G	G	G	G	G	G	G	G	G	G	A
2	73568718	rs239490530	indel	I:Chrna1	Chrna1		0											1
2	73568997		indel		Chrna1		0											1
2	73569001		indel		Chrna1		0											1
2	73569125	rs255462432	C/T	I:Chrna1	Chrna1	T	T	T	T	T	T	T	T	T	T	T	T	C
2	73569186	rs27953979	C/T	I:Chrna1	Chrna1	C	C	C	C	C	C	C	C	C	C	C	C	T
2	73569243	rs223548213	A/C	I:Chrna1	Chrna1	C	C	C	C	C	C	C	C	C	C	C	C	A
2	73569244	rs240669280	A/G	I:Chrna1	Chrna1	A	A	A	A	A	A	A	A	A	A	A	A	G
2	73569255	rs27953978	C/T	I:Chrna1	Chrna1	T	T	T	T	T	T	T	T	T	T	T	T	C
2	73569274	rs27953977	A/G	I:Chrna1	Chrna1	G	G	G	G	G	G	G	G	G	G	G	G	A
2	73569453	rs261706474	G/T	I:Chrna1	Chrna1	G	G	G	G	G	G	G	G	G	G	G	G	T
2	73569465	rs246374646	C/G	I:Chrna1	Chrna1	G	G	G	G	G	G	G	G	G	G	G	G	C
2	73569680	rs27953975	A/G	I:Chrna1	Chrna1	G	G	G	G	G	G	G	G	G	G	G	G	A
2	73569702	rs27953974	A/G	I:Chrna1	Chrna1	G	G	G	G	G	G	G	G	G	G	G	G	A
2	73569714	rs246002021	indel	I:Chrna1	Chrna1		0											2
2	73569976	rs242034005	A/G	I:Chrna1	Chrna1	A	A	A	A	A	A	A	A	A	A	A	A	G
2	73569991	rs255270886	C/T	I:Chrna1	Chrna1	T	T	T	T	T	T	T	T	T	T	T	T	C
2	73570065	rs217486084	C/T	I:Chrna1	Chrna1	C	C	C	C	C	C	C	C	C	C	C	C	T
2	73570086	rs234063203	C/T	I:Chrna1	Chrna1	C	C	C	C	C	C	C	C	C	C	C	C	T
2	73570120	rs253734467	C/T	I:Chrna1	Chrna1	T	T	T	T	T	T	T	T	T	T	T	T	C
2	73570121	rs222333457	A/G	I:Chrna1	Chrna1	G	G	G	G	G	G	G	G	G	G	G	G	A
2	73570249	rs222033364	C/G	I:Chrna1	Chrna1	G	G	G	G	G	G	G	G	G	G	G	G	C
2	73570251	rs241147414	C/T	I:Chrna1	Chrna1	T	T	T	T	T	T	T	T	T	T	T	T	C
2	73570252	rs260295167	C/T	I:Chrna1	Chrna1	T	T	T	T	T	T	T	T	T	T	T	T	C
2	73570311	rs226525332	C/T	I:Chrna1	Chrna1	T	T	T	T	T	T	T	T	T	T	T	T	C
2	73570318	rs239712126	A/G	I:Chrna1	Chrna1	G	G	G	G	G	G	G	G	G	G	G	G	A
2	73570328	rs262232733	A/G	I:Chrna1	Chrna1	A	A	A	A	A	A	A	A	A	A	A	A	G
2	73570570	rs27953971	C/T	Cs:Chrna1:K:205	Chrna1	C	C	C	C	C	C	C	C	C	C	C	C	T
2	73570633	rs27953970	C/T	Cs:Chrna1:Q:184	Chrna1	C	C	C	C	C	C	C	C	C	C	C	C	T
2	73570662	rs27953969	A/G	I:Chrna1	Chrna1	G	G	G	G	G	G	G	G	G	G	G	G	A
2	73570688	rs27953967	C/T	I:Chrna1	Chrna1	C	C	C	C	C	C	C	C	C	C	C	C	T
2	73570711	rs245648947	indel	I:Chrna1	Chrna1		0											1
2	73570777	rs213937789	A/G	I:Chrna1	Chrna1	A	A	A	A	A	A	A	A	A	A	A	A	G
2	73570816	rs213997980	A/G	I:Chrna1	Chrna1	G	G	G	G	G	G	G	G	G	G	G	G	A
2	73570817	rs221416646	A/G	I:Chrna1	Chrna1	G	G	G	G	G	G	G	G	G	G	G	G	A
2	73570935	rs264990261	C/T	I:Chrna1	Chrna1	T	T	T	T	T	T	T	T	T	T	T	T	C
2	73571162		indel		Chrna1		0											1
2	73571221	rs249772357	indel	I:Chrna1	Chrna1		0											2
2	73571248	rs245704977	indel	I:Chrna1	Chrna1		0											1
2	73571293	rs27953963	C/T	I:Chrna1	Chrna1	C	C	C	C	C	C	C	C	C	C	C	C	T
2	73571419	rs27953961	A/G	Cs:Chrna1:I:178	Chrna1	A	A	A	A	A	A	A	A	A	A	A	A	G
2	73571608	rs27953960	A/G	Cs:Chrna1:N:115	Chrna1	G	G	G	G	G	G	G	G	G	G	G	G	A
2	73571740	rs257489427	A/G	I:Chrna1	Chrna1	A	A	A	A	A	A	A	A	A	A	A	A	G
2	73571752	rs222728826	C/G	I:Chrna1	Chrna1	G	G	G	G	G	G	G	G	G	G	G	G	C
2	73572204	rs239003630	A/G	I:Chrna1	Chrna1	G	G	G	G	G	G	G	G	G	G	G	G	A
2	73572213	rs233338648	G/T	I:Chrna1	Chrna1	G	G	G	G	G	G	G	G	G	G	G	G	T
2	73572214	rs223817658	C/G	I:Chrna1	Chrna1	G	G	G	G	G	G	G	G	G	G	G	G	C
2	73572215	rs235825279	A/G	I:Chrna1	Chrna1	G	G	G	G	G	G	G	G	G	G	G	G	A
2	73572216	rs579030939	C/G	I:Chrna1	Chrna1	G	G	G	G	G	G	G	G	G	G	G	G	C
2	73572217	rs255963613	A/G	I:Chrna1	Chrna1	G	G	G	G	G	G	G	G	G	G	G	G	A
2	73572400	rs246737488	A/C	I:Chrna1	Chrna1	A	A	A	A	A	A	A	A	A	A	A	A	C
2	73572688	rs27953951	G/T	I:Chrna1	Chrna1	G	G	G	G	G	G	G	G	G	G	G	G	T
2	73572959	rs255094852	indel	I:Chrna1	Chrna1		0											1
2	73573022	rs27953949	C/T	I:Chrna1	Chrna1	T	T	T	T	T	T	T	T	T	T	T	T	C
2	73573250	rs215722205	indel	I:Chrna1	Chrna1		0											1
2	73573402	rs579579989	C/T	I:Chrna1	Chrna1	T	T	T	T	T	T	T	T	T	T	T	T	C
2	73573418	rs221252964	indel	I:Chrna1	Chrna1		0											1
2	73573437	rs232561837	A/G	I:Chrna1	Chrna1	A	A	A	A	A	A	A	A	A	A	A	A	G
2	73573587	rs228676587	C/T	I:Chrna1	Chrna1	C	C	C	C	C	C	C	C	C	C	C	C	T
2	73573625	rs244610989	A/G	I:Chrna1	Chrna1	G	G	G	G	G	G	G	G	G	G	G	G	A
2	73573640	rs217023089	A/G	I:Chrna1	Chrna1	G	G	G	G	G	G	G	G	G	G	G	G	A
2	73573671	rs239800431	A/G	I:Chrna1	Chrna1	G	G	G	G	G	G	G	G	G	G	G	G	A
2	73573703	rs216863467	A/C/G	I:Chrna1	Chrna1	G	G	G	G	G	G	G	G	G	G	G	G	A
2	73573889	rs236576134	A/G	I:Chrna1	Chrna1	G	G	G	G	G	G	G	G	G	G	G	G	A
2	73573904	rs252582635	C/T	I:Chrna1	Chrna1	C	C	C	C	C	C	C	C	C	C	C	C	T
2	73573954				Chrna1	G	G	G	G	G	G	G	G	G	G	G	G	A
2	73574004	rs585168234	A/G	I:Chrna1	Chrna1	G	G	G	G	G	G	G	G	G	G	G	G	A
2	73574005	rs222682384	A/T	I:Chrna1	Chrna1	A	A	A	A	A	A	A	A	A	A	A	A	T
2	73574010	rs241596204	A/T	I:Chrna1	Chrna1	A	A	A	A	A	A	A	A	A	A	A	A	T
2	73574013	rs257295798	A/G	I:Chrna1	Chrna1	A	A	A	A	A	A	A	A	A	A	A	A	G
2	73574014	rs225337554	A/T	I:Chrna1	Chrna1	A	A	A	A	A	A	A	A	A	A	A	A	T
2	73574043	rs243338967	A/G	I:Chrna1	Chrna1	A	A	A	A	A	A	A	A	A	A	A	A	G
2	73574044	rs264080549	C/G	I:Chrna1	Chrna1	G	G	G	G	G	G	G	G	G	G	G	G	C
2	73574055	rs227965664	A/G	I:Chrna1	Chrna1	A	A	A	A	A	A	A	A	A	A	A	A	G
2	73574084	rs227986627	indel	I:Chrna1	Chrna1		0											1
2	73574117		indel		Chrna1		0											1
2	73574294	rs246893300	A/G	I:Chrna1	Chrna1	G	G	G	G	G	G	G	G	G	G	G	G	A
2	73574307	rs237701379	A/C	I:Chrna1	Chrna1	C	C	C	C	C	C	C	C	C	C	C	C	A
2	73574308	rs251249745	A/C	I:Chrna1	Chrna1	A	A	A	A	A	A	A	A	A	A	A	A	C
2	73574336	rs211937188	A/G	Cs:Chrna1:N:73	Chrna1	A	A	A	A	A	A	A	A	A	A	A	A	G
2	73574368	rs230570725	A/G	I:Chrna1	Chrna1	A	A	A	A	A	A	A	A	A	A	A	A	G
2	73574525	rs252562683	C/T	Cs:Chrna1:Q:50	Chrna1	T	T	T	T	T	T	T	T	T	T	T	T	C
2	73574634	rs222583577	A/G	I:Chrna1	Chrna1	G	G	G	G	G	G	G	G	G	G	G	G	A
2	73574961	rs583816585	A/G	I:Chrna1	Chrna1	G	G	G	G	G	G	G	G	G	G	G	G	A
2	73574970	rs235610736	indel	I:Chrna1	Chrna1		0											1
2	73575003	rs263365403	C/T	I:Chrna1	Chrna1	C	C	C	C	C	C	C	C	C	C	C	C	T
2	73575005	rs219991176	G/T	I:Chrna1	Chrna1	G	G	G	G	G	G	G	G	G	G	G	G	T
2	73575067	rs246044667	A/G	I:Chrna1	Chrna1	G	G	G	G	G	G	G	G	G	G	G	G	A
2	73575071	rs262841438	C/T	I:Chrna1	Chrna1	C	C	C	C	C	C	C	C	C	C	C	C	T
2	73575101	rs238311353	G/T	I:Chrna1	Chrna1	T	T	T	T	T	T	T	T	T	T	T	T	G
2	73575151	rs265813440	A/T	I:Chrna1	Chrna1	A	A	A	A	A	A	A	A	A	A	A	A	T
2	73575155	rs229390748	A/G	I:Chrna1	Chrna1	G	G	G	G	G	G	G	G	G	G	G	G	A
2	73575178	rs255897822	A/T	I:Chrna1	Chrna1	T	T	T	T	T	T	T	T	T	T	T	T	A
2	73575197	rs211814805	G/T	I:Chrna1	Chrna1	T	T	T	T	T	T	T	T	T	T	T	T	G
2	73575251	rs246526767	A/G	I:Chrna1	Chrna1	G	G	G	G	G	G	G	G	G	G	G	G	A
2	73575263	rs232785083	A/G	I:Chrna1	Chrna1	A	A	A	A	A	A	A	A	A	A	A	A	G
2	73575363	rs236251442	A/T	I:Chrna1	Chrna1	A	A	A	A	A	A	A	A	A	A	A	A	T
2	73575529	rs238679226	indel	I:Chrna1	Chrna1		0											1
2	73575635	rs223706211	C/G/T	I:Chrna1	Chrna1	C	C	C	C	C	C	C	C	C	C	C	C	T
2	73575795	rs230697050	C/T	I:Chrna1	Chrna1	C	C	C	C	C	C	C	C	C	C	C	C	T
2	73575809	rs253596749	C/T	I:Chrna1	Chrna1	C	C	C	C	C	C	C	C	C	C	C	C	T
2	73575885	rs224024331	C/T	I:Chrna1	Chrna1	C	C	C	C	C	C	C	C	C	C	C	C	T
2	73575899	rs246498125	C/T	I:Chrna1	Chrna1	T	T	T	T	T	T	T	T	T	T	T	T	C
2	73575902	rs217167511	C/T	I:Chrna1	Chrna1	C	C	C	C	C	C	C	C	C	C	C	C	T
2	73575947	rs213697840	G/T	I:Chrna1	Chrna1	G	G	G	G	G	G	G	G	G	G	G	G	T
2	73576007	rs238963007	A/G	I:Chrna1	Chrna1	A	A	A	A	A	A	A	A	A	A	A	A	G
2	73576012	rs255498797	C/T	I:Chrna1	Chrna1	C	C	C	C	C	C	C	C	C	C	C	C	T
2	73576038	rs583448369	C/T	I:Chrna1	Chrna1	C	C	C	C	C	C	C	C	C	C	C	C	T
2	73576062	rs254565449	A/G	I:Chrna1	Chrna1	A	A	A	A	A	A	A	A	A	A	A	A	G
2	73576089	rs245604288	A/G	I:Chrna1	Chrna1	G	G	G	G	G	G	G	G	G	G	G	G	A
2	73576171	rs251821192	C/G	I:Chrna1	Chrna1	C	C	C	C	C	C	C	C	C	C	C	C	G
2	73576184	rs223928757	C/T	I:Chrna1	Chrna1	T	T	T	T	T	T	T	T	T	T	T	T	C
2	73576567	rs217516399	A/T	I:Chrna1	Chrna1	T	T	T	T	T	T	T	T	T	T	T	T	A
2	73576788	rs50164496	A/G	I:Chrna1	Chrna1	A	A	A	A	A	A	A	A	A	A	A	A	G
2	73577297	rs27953941	G/T	I:Chrna1	Chrna1	G	G	G	G	G	G	G	G	G	G	G	G	T
2	73577780	rs223161341	A/G	I:Chrna1	Chrna1	A	A	A	A	A	A	A	A	A	A	A	A	G
2	73577880	rs228500545	A/C	I:Chrna1	Chrna1	C	C	C	C	C	C	C	C	C	C	C	C	A
2	73578035		indel		Chrna1		0											1
2	73578651	rs27953931	C/T	I:Chrna1	Chrna1	C	C	C	C	C	C	C	C	C	C	C	C	T
2	73578789	rs257439543	indel	I:Chrna1	Chrna1		0											1
2	73578808	rs27953926	C/T	I:Chrna1	Chrna1	T	T	T	T	T	T	T	T	T	T	T	T	C
2	73578895	rs262235307	A/C	I:Chrna1	Chrna1	A	A	A	A	A	A	A	A	A	A	A	A	C
2	73578935	rs214089364	A/G	I:Chrna1	Chrna1	A	A	A	A	A	A	A	A	A	A	A	A	G
2	73579045	rs246839464	A/T	I:Chrna1	Chrna1	T	T	T	T	T	T	T	T	T	T	T	T	A
2	73579050	rs579396763	A/T	I:Chrna1	Chrna1	A	A	A	A	A	A	A	A	A	A	A	A	T
2	73579051	rs582910705	A/T	I:Chrna1	Chrna1	A	A	A	A	A	A	A	A	A		A	A	T
2	73579605	rs216410449	C/T	I:Chrna1	Chrna1	C	C	C	C	C	C	C	C	C	C	C	C	T
2	73579758		indel		Chrna1		0											1
2	73579761				Chrna1	C	C	C	C	C	C	C	C	C	C	C	C	A
2	73579765	rs237903700	C/T	I:Chrna1	Chrna1	C	C	C	C	C	C	C	C	C	C	C	C	T
2	73579898	rs222045501	A/C	I:Chrna1	Chrna1	C	C	C	C	C	C	C	C	C	C	C	C	A
2	73580095	rs242719712	A/C	I:Chrna1	Chrna1	C	C	C	C	C	C	C	C	C	C	C	C	A
2	73580199	rs27953923	C/T	I:Chrna1	Chrna1	T	T	T	T	T	T	T	T	T	T	T	T	C

[truncated: 15 more sheets: Chrna5, Chrnb1, Chrnb3, Chrnb4, Chrna2, Chrnd, Chrna6, Chrna9, Chrne, Chrng, Chrm1, Chrm2, Chrm4, Chrm5, Chrna10]
